# Supplementary material for: The complete functional characterisation of the terpene synthase family in tomato
Source: PubMed Central journal article supplement (PMC7422722; doi:10.1111/nph.16431), 2020-02-19
Supplement: NPH-226-1341-s001.pdf [file NPH-226-1341-s001.pdf]

***New Phytologist* Supporting Information Figs S1-S18, Methods S1 and Tables S1-S7**

Article title: The complete functional characterization of the terpene synthase family in tomato

Authors: Fei Zhou and Eran Pichersky

Article acceptance date: 5 January 2020

The following Supporting Information is available for this article:

**Fig. S1** Annotated sequences of *TPS51* and *TPS52*.

**Fig. S2** SDS-PAGE analysis of the purified recombinant His-tagged TPS proteins.

**Fig. S3** Mass spectra of identified terpenes from Figs 3-5 and 10.

**Fig. S4** GC-MS analysis of elemol and (+)-hedycaryol.

**Fig. S5** GC-MS analysis of the products formed in planta by transiently co-expressing TPS with CPT genes in *Nicotiana benthamiana* leaves.

**Fig. S6** Analysis of tomato terpene synthases with isoprene synthases from other plants.

**Fig. S7** Sequence alignment of the proteins encoded by the functional tomato TPS-c genes and CPS genes from other plants.

**Fig. S8** Predictions of subcellular localization for TPS and prenyltransferase proteins made by TargetP 1.1 (a) and ChloroP 1.1 (b).

**Fig. S9** Phylogenetic analysis of tomato TPT homologs and TPTs identified in other plants.

**Fig. S10** GC-MS analysis of the products formed in planta by transiently co-expressing TPS with TPT genes in *Nicotiana benthamiana* leaves.

**Fig. S11** Sequence alignment of five Arabidopsis sesterterpene synthases and tomato TPSs from TPS-a, TPS-b and TPS-g clades.

**Fig. S12** Sequence alignment of the proteins encoded by the functional tomato TPS-a genes.

**Fig. S13** Sequence alignment of the proteins encoded by the functional tomato TPS-b and TPS-g genes.

**Fig. S14** Sequence alignment of the proteins encoded by the functional tomato TPS-e/f

genes.

**Fig. S15** Sequence analysis of TPT homologs from tomato and other plants.

**Fig. S16** GC-MS analysis of terpenes extracted from tomato leaves.

**Fig. S17** Correlation analysis of terpene biosynthesis genes and volatile terpenes from tomato.

**Fig. S18** Terpene biosynthesis gene clusters identified from tomato genome by plantiSMASH.

**Table S1** Primers used in this study.

**Table S2** A list of terpene compounds identified from Figs 3-5 and 10.

**Table S3** A list of tomato terpene synthase genes, their characteristics, and the enzymes they encode.

**Table S4** A list of tomato terpene synthase pseudogenes.

**Table S5** A list of the *trans*-prenyltransferase genes in tomato.

**Table S6** A list of terpene compounds produced by all the functional tomato terpene synthases.

**Table S7** A list of Arabidopsis terpene synthase genes, their characteristics, and the enzymes they encode.

**Methods S1** Details on experimental procedures.

**Fig. S1 Annotated sequences of *TPS51* and *TPS52*.** Exons are shading in yellow, gaps in the reference genome ([https://solgenomics.net/organism/Solanum\\_lycopersicum/genome](https://solgenomics.net/organism/Solanum_lycopersicum/genome); the 2017 release of version SL3.0) are underlined and filled by sequencing the cloned genomic DNA. Stop codons are shown in red. The obtained genomic sequences of *TPS51* and *TPS52* have been deposited to GenBank under accession numbers MN366354 and MN366355, respectively. The genomic sequences of other genes studied in this work can be found in the tomato genome database under loci listed in Tables S3-S5.

>TPS51 genomic sequence

```
AATTATTTATTTTTATGAAAAGTATTTTCTTAACGAATCTTTTCAGAGTTGAATTTTGACCATTATAAGTT
GGTCAGTTGAGCTCGTTGAATATCCAACCTAACATCTATTTAATCAAATGTTGGTTCTTTTCTTTACCTA
AATGAACAAGAAAAATGGATGGATTTGGTGATGAGGCAGAGATTATACGTCGGTGTGCCAATCATCATCCT
TCTGTTTGGGGAGACCATTTTCTTGCTTATGCTAATCTCTTGGTAAATTTGGATTTAATTAATTACTTTAT
GTTATATATATTCTTTATGTATTATTATACGTATATACATACCATAAATTTCGAAATTTACTCTTGCACGT
AGGGAGCCAATGAATGTGAAAAGAAGAAACATGAAGACCTAAAAAAGAAGCGAGGAAAATGCTAGTGCTT
TCTCCTTCCAAATCTTTGCAAAAACCTTGAACCTATAAACACAATCCAATTGCTTGGAGTGTACATACCATT
TGAACATGAGATTGAGGAATCATTGAGTGAATCTATAATGGTTATGAAGAATGGATTGGTGAAGTCATG
ACCTTCATGATGTTGCTCTAAGCTTTCGATTACTCAGGCAACAAGGTTATTACGTCTCATCAGGTGAGTAC
CCCCAACACCAACTAGAGATTATGTGATGAGTTAAATTTGTTGGTAAAAGTTTTTTAACTTTCTTACTACT
AACGGTACAAGTATGGTTATTTTTTAAGCAGATGTTTTTAGGAAGTTCCTGATGAGAGAGGAAATTACAA
GGAAACTTTGGCCAGCGACGTACAAGGATTATTGAGCTTGTATGAGGCAGCGCAACTCAGAGTAGATGATG
AAGAAATCTGGATGAAGCAATTAATTTACCCTACTCACTTGAAGCTACTTTTGCCTAATTTGAGTGAT
CCCCTTGCGACTCAAGTTAGTAACGCGCTGAAATTTCCAATCAACAATATTATAGTGAGGGTAGCAACTAG
AAAATACATTTTCAATTTACCAAGAAGATAAATCACACAATGAAATGTTACTACATTTTGCTAAATGGACT
TCAACATTTTACAAAGGCTGCACAAAAGGGAGCTATGTGATATCACAAGGTAATTGACAAGTTAAACATTT
ACTAATCGATTTAACTTATATAATTCCTGAAATTATAATTTGTCTCTACAAATTTTAGGTGGTGGAAAGA
CTCGGAAATCGCGCAGGCACTACCTTTTGCTAGAGATAGAGTGGTTGAATTATATTTTTGGAGTTGGGTG
TCTATTTTGAGCCTCACTATAGTGTTGCAAGGAAAATACTAACCAGGTTGTTATGTTTCTGTTCTATTATG
GATGATACTTACGATACCTATGGCACACTGGATGAACTTACTCTCCTCACAACGGCCATTGAAAGGTTTAA
GTTCTTTTCTCACATCAAGATTTTTATGTTTCTAACACTAAAAATGAATTATCACCGTAAAATATAAGAAA
TTTTGAGAATGTGATATATGTATCGTAGTTGGGACATTGATGCTTCGGAACAATTACCGCCCTATATGAAG
CTCTCCTACCGTGCTCTTGTACAAGTTTACTGAAGCAGAGAGAGAATTGGAAAATCTTGAAAATAAGAT
GACATTTAGAGTCAAATATTCCATCAATGAGGTAATCAAAGAATTATTACTGAATGATGAAAATATAGTCA
AAATTA AAAAGCTTGTTACTTTTTTTCAGATGAAAAGTTGTTGAGGGCTTACTTCCAAGAGGCCAAATGG
TATCATGAGAAAGTTGTGCCAACAATGGAACAATATATAAAGAATGGAATTCATCCAGCACTTACCTATT
GCTTGCTACTACTTCTTGGTTAGGCATGGGAGATGTAGCAACTAAGGATGCGTTTGATTGGATATCGAATG
AACCTACAATCTTGTAGCTTTGTCTATCATTGCAAGATTACTCAATGATCTCGTAACACATGAGGTATTA
TATTGTACGTGTAATAATAACTCAAGGATAAATAGGAAGTGCTACATATACAAATTTGAATATGAGGTACT
ATTTTTGCTAGTCTTTAACTTGTGTTGCTGATTATATTATGGATACAGATAGAAGTGGAAAGAGGAGATG
TAGCATCGGGTATTGAATGTTACATGAACGAGTATGGTGCCACAAAAGAAGAAGCTTACATGGAGACAAGG
AAAATAATAGAGAATAATTGGAAGGTTTTGAATAGAGGATGCCTAAAGCCTACAACAGTACCAAGAGTTTT
```

ACTCATGCCAGTGCTCAACCTTACGAGGGTGGCAGAGTTCTTTTATAAAGATGATGATGCTTATACTTTTT  
CCACAAATAACTTGAAAGACATCATCTCTTTGGTGCTAATTGATCCTATTACAACA TAA GAGA AACTTTACA  
ATGAAACTACTAGTACTTCATAAACATCTAACATTTTTTTGATGTTGCTTATTTCTGTGCTAAGTTCTAGCT  
TAGCTAAAATTGCCTATGTTTTATTTATGTACTTTGTTATGGTTGTCAATTGATATATGGACTGCTTTGAT  
ACAGTTAATACAAACTACAATATATATAAAATCACCTAGCATTATATATAGATTAGTCTTTTCGAC

>TPS52 genomic sequence

GAGCTCAAATAACACCCATTTGTTCAATACTGTTTTTCTCTTCACTATATATATAGTAACTTTAAAGAA  
GAAGAAAAATGGTCGTTGGATTTGGTGGTGAAGCGGAGATTACACGTCGATGTGCCAATCATCATCCTTCT  
GTTTGGGGAGACCATTTTCTTACCTATGCTAATCTCTTGGTAATTAAGTGCTTGATTTATGTTGTGAATAT  
TATTCATGATTTTTTAACAAATCATATTATAAACAAATTATGAAATTTATTTGTGTAGGGAGCCAATGAATG  
GGAAGAGAAGGAACATGAAGACCAAAAAGGAGGAGTGAGAAAAATGCTAGTGCTTTCTCCTTCCAAATCTT  
TGCAAAAACCTGAACTTATAAACACAATCCAATTGCTTGGAGTGTACATACCATTTTGAACATGAGATTGAG  
GAATCATTGAGTGAATCTATAATGGTTATGAAGAATGGATTGGTGAAGTCATGACCTTCATGATGTTGC  
TCTAAGCTTTTCGATTACTCAGGCAACAAGGTTATTACGTCTCATCAGGTGAGTACCCCAACACCAACTAG  
AGATTATGTGATGAGTTAAATTTGTTGGTAAAAGTTTTTTTAACTTTCTATACTAACGGTACAAGTATGG  
TTATTTTTTAAAGCAGATGTTTTTAGGAAGTTCCTGATGAGAGAGGAAATTACAAGGAACTTTGGCCAGC  
GACGTACAAGGATTATTGAGCTTGTATGAGGCAGCGCAACTCAGAGTAGATGATGAAGAAATTCTGGATGA  
AGCAATTAATTTACCCTACTCACTTGAAGCTACTTTTGCCTAATTTGAGTGATCCCCTTGCCTACTCAAG  
TTAGTAACCGCTGAAATTTCCAATCAACAATATTATAGTGAGGGTAGCAACTAGAAAATACATTTTCAATTT  
TACCAAGAAGATAAATCACACAATGAAATGTTACTACATTTTGTCTAAATTGGACTTCAACATTTTACAAAG  
GCTGCACAAAAGGGAGCTATGTGATATCACAAGGTAATTGACAAGTTAAACATTTACTAATCGATTTAACT  
TATATAATTCCTGAAATTATAATTTTGTCTCTACAAATTTTAGGTGGTGGAAAGACTCGGAAATCGCGCAG  
GCCTACTCTTTTGTAGAGATAGAGTGGTTGAATTATTTTTTGGAGTTGGGTGTCTATTTTTGAGCCTCA  
CTATAGTGTTGCAAGGAAAATACTAACCAAGTGTATGTTTCTGTTCTATTATGGATGATACTTACGATA  
CCTATGGCACACTGGATGAACTTACTCTCCTCACAACGGCCATTGAAAGGTTTAAAGTTCTTTTCTCACATC  
AAGATTTTTATGTTTCTAACACTAAAAATGAATTATCACCGTAAAATATAAGAAATTTTGAAGATGTGATA  
TATGTATCGTAGGTGGGACATTGATGCTTCGGAACAATTACCTTCATATATGAAGCTCTCCTACCGTGCTC  
TTGTACAAGTTTACAATGAAACGGAGAAAGAATTGGAAAATCTTGGAAATAAGATGACATATAGAGTCAA  
TATTCCATCAATGAGGTAATCAAGAATTATTACTGAATGATGAAAATATAGTCAAGATTAAGGCTTGTTA  
CTTTTTTTCAGATGAAAAAGTTGTTGAGGGCTTACTTCCAAGAGGCCAAATGGTATCATGGGAAGGATGTG  
CCAACAATGGAACAATATATAAAGAATGGAATTCATCAAGTACTTATCTATTGCTTGCCTACTTCTTG  
GTTAGGCATGGGAGACGTAGCAACTAAGGATGCGTTTTGATTGGATATCGAATGAACCTACAATTCTTGATG  
CTTCGTCTATCATTGCAAGATTACTCAATGATCTCGTAACACATGAGGTATTATATTGTACGCGCAAATAT  
TAATTATGAGGGTATAATTTCTTTATATTTTCACTTGTTCCTAATTATATTATGGATACAGATAGAAGT  
GGAAAGAGGAGATGTAGCATCGGGTATTGAATGTTACATGAACGAGTATGGTGCCACAAAAGAAGAAGCTT  
ACATGGAGATAAGGAAAATAATAGAGAATAATTGGAAGGATTTGAATAGAGGATGCCTAAAGCCTACAACA  
GTACCAAGAGTTTTACTCATGCCAGTGCTCAACCTTACGAGGGTGGCAGAGTTTTTTTTATAAAGACGAAGA  
TGCTTATACTTTTTCGAAAAATAACTTGAAAGACGTCATCTCTATGGTGCTAATTGATCCTATAAAGCAT  
GAGAGAATTTCACTATGAAGGGAAAATAATAAATAAAAGTAGTAGTCATGAACAACATCTGATGTTGCTT  
CTTTATGGAGGTTGTGGCTTGTTTTTACTATTTTGTATCTTGATGTTGTTTTATCTTTGTGTCAGCTGTTG

**Fig. S2 SDS-PAGE analysis of the purified recombinant His-tagged TPS proteins.** T, total protein after IPTG induction; S, soluble fraction; P, purified fraction with Ni-NTA agarose as described in Methods S1.

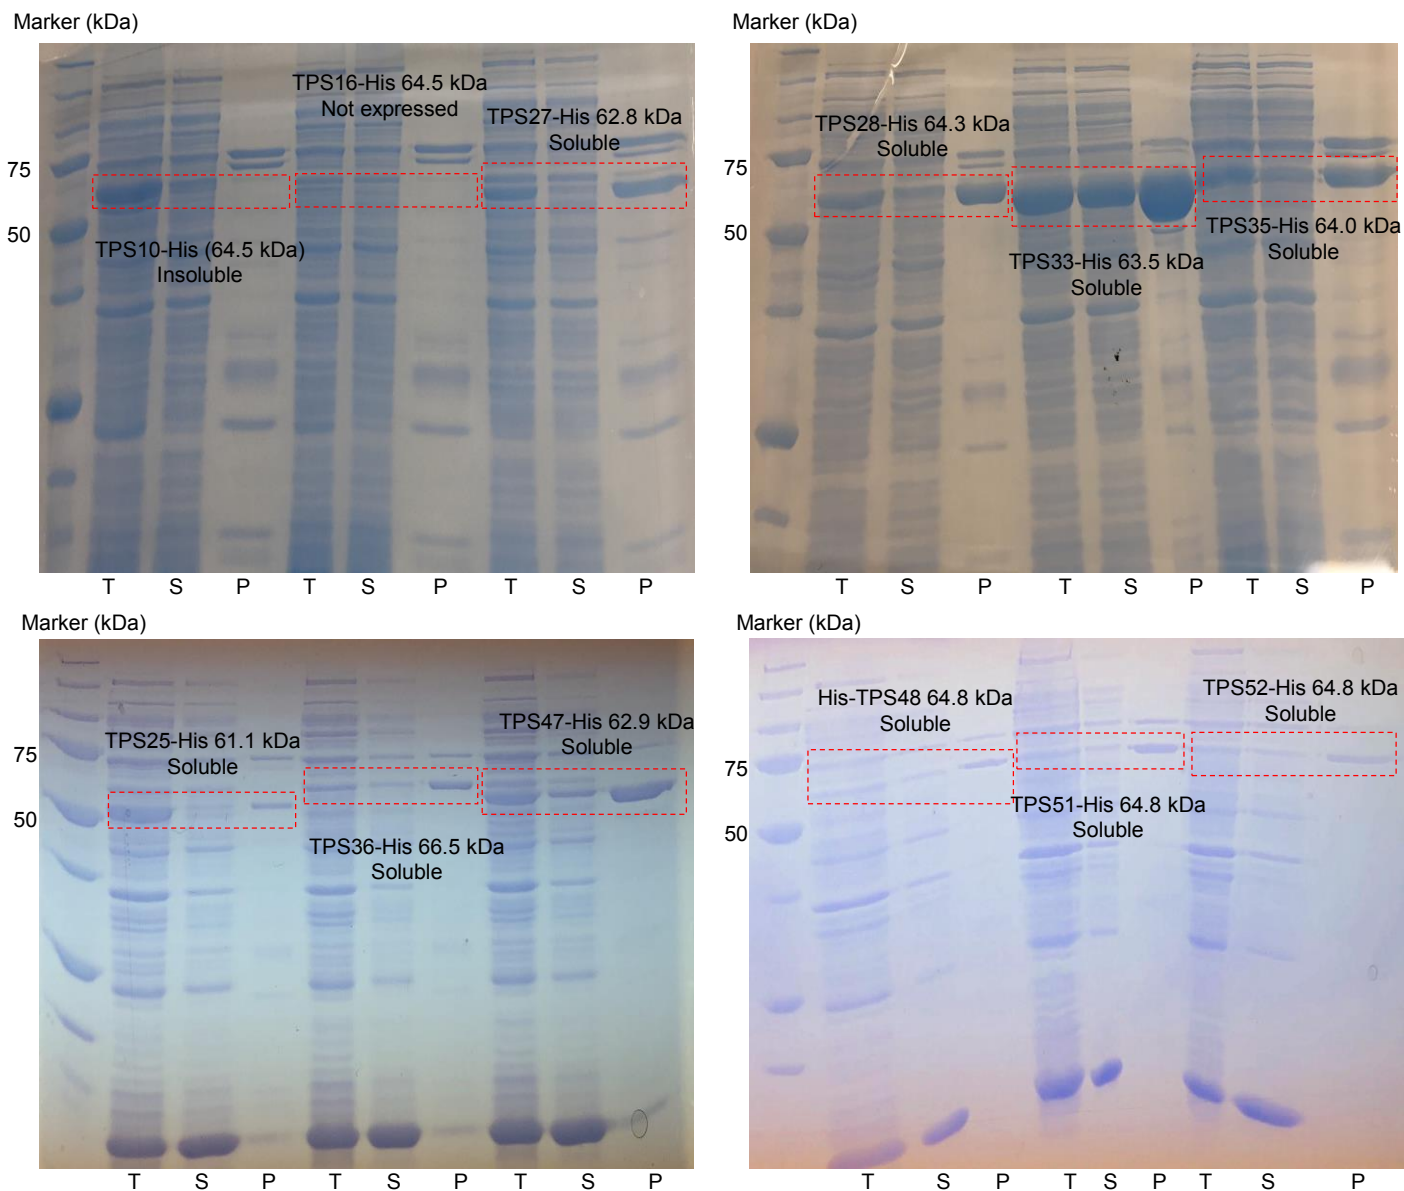

**Fig. S3 Mass spectra of identified terpenes from Figs 3-5 and 10.** The mass spectra of identified terpenes from NIST library are shown on the right. Compounds listed in order of elution from the Rxi-5Si1 MS column, the enzymatic products are shown in bold. Detailed information can be found in Table S2.

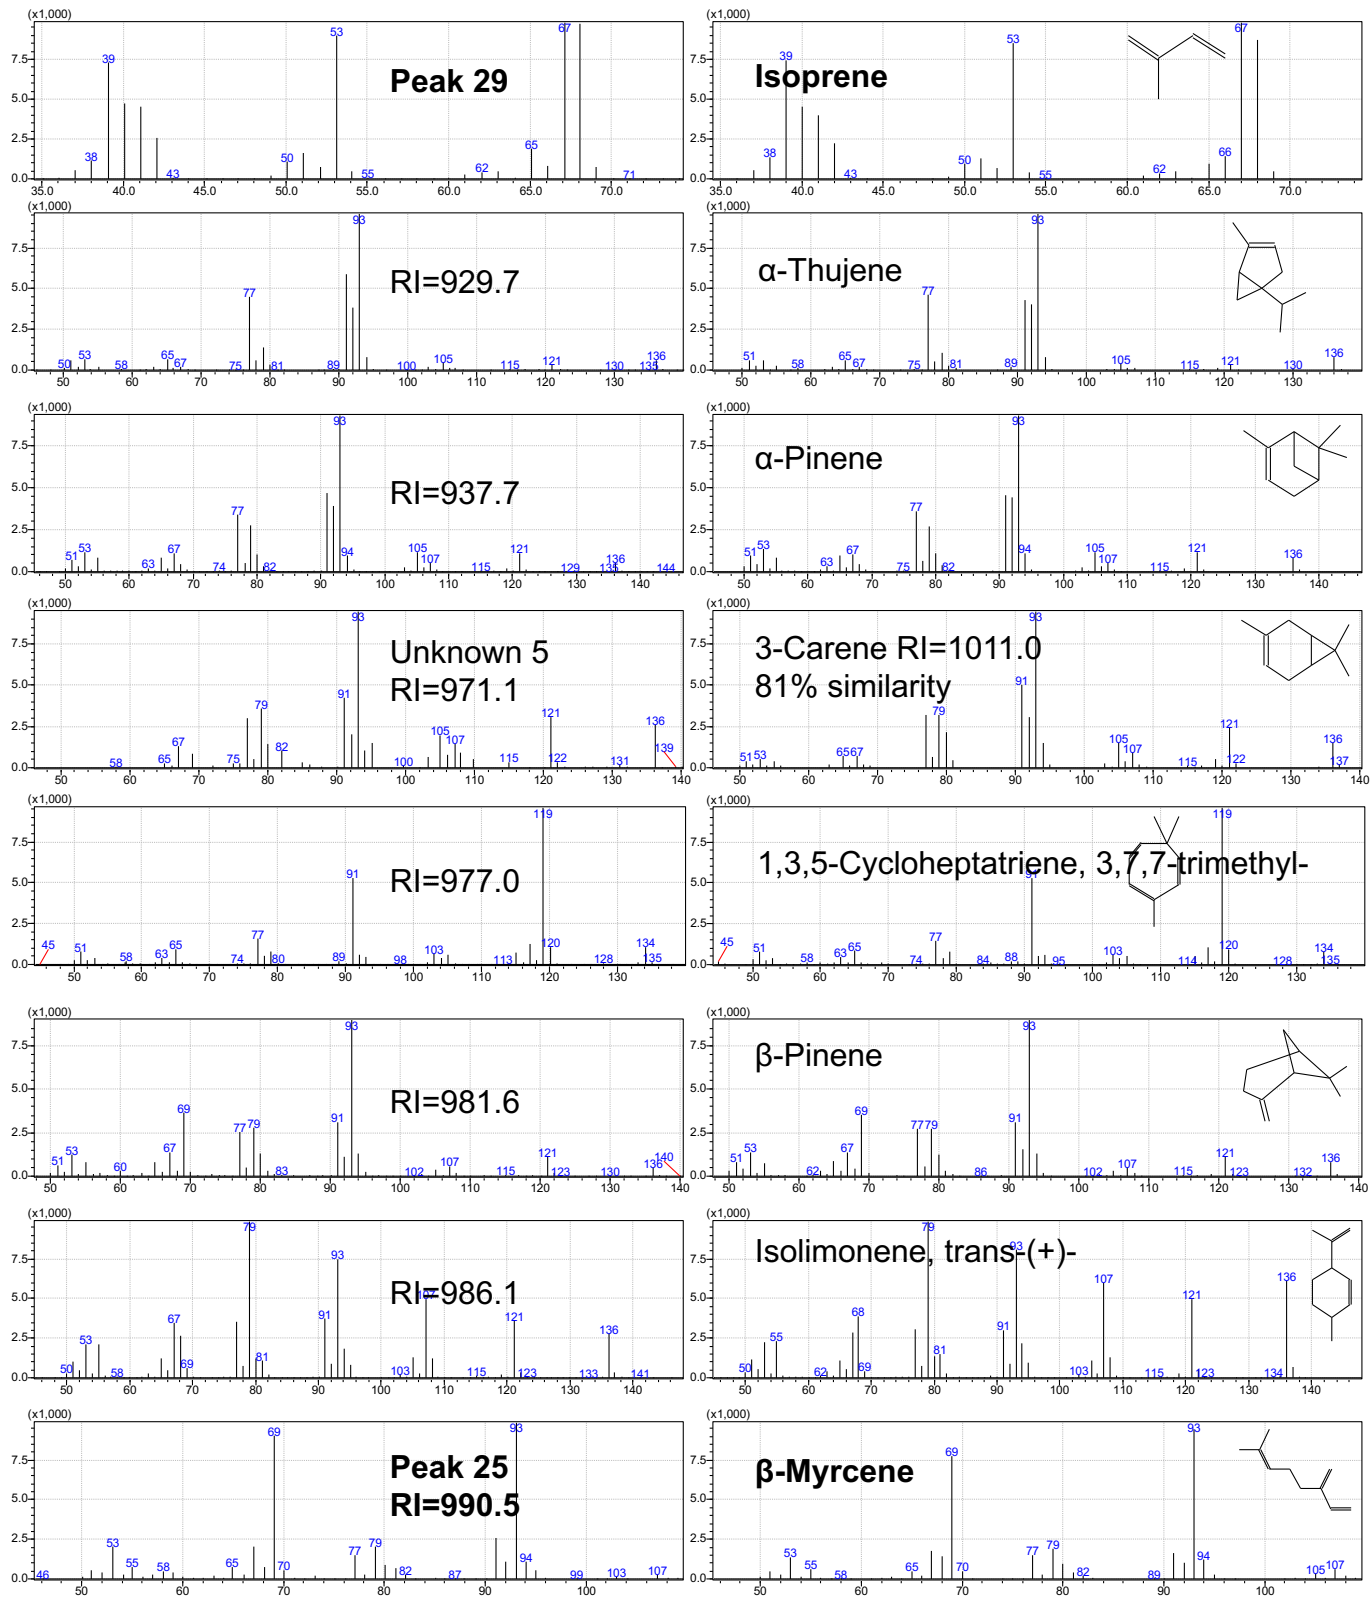

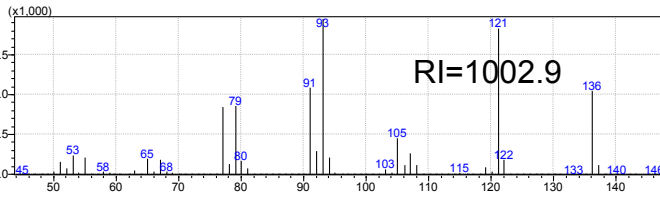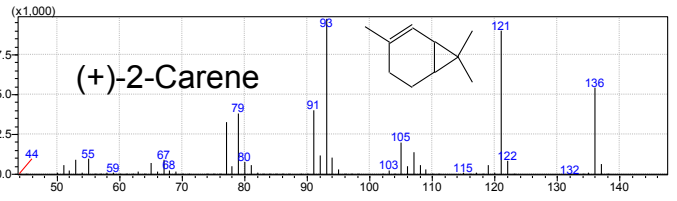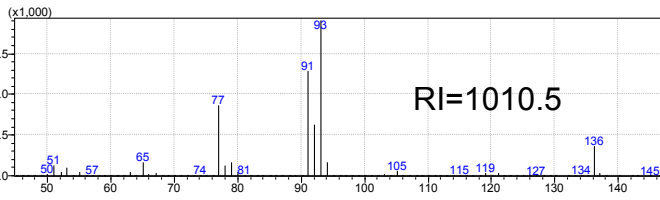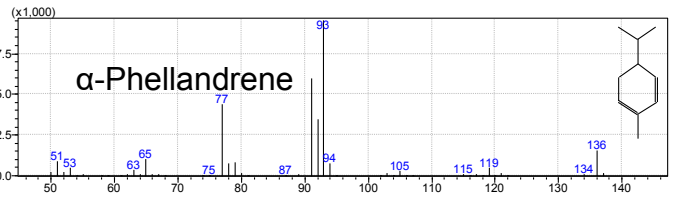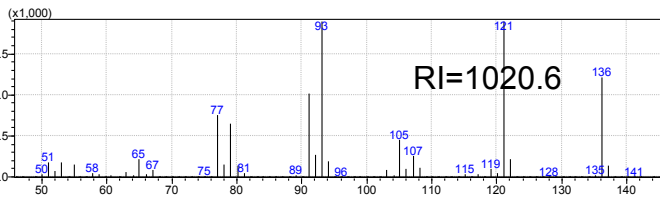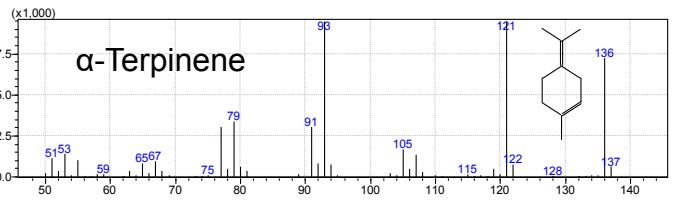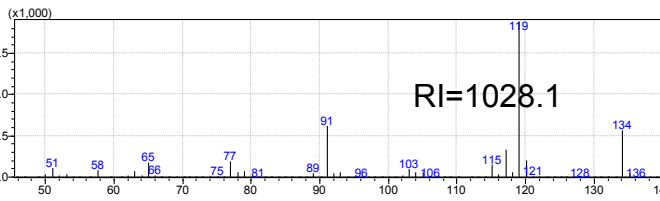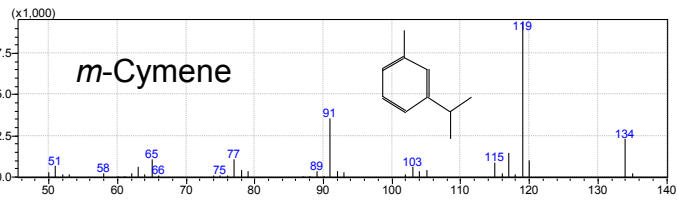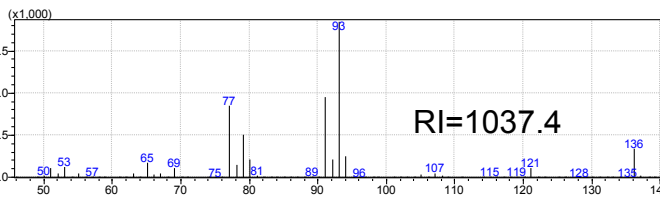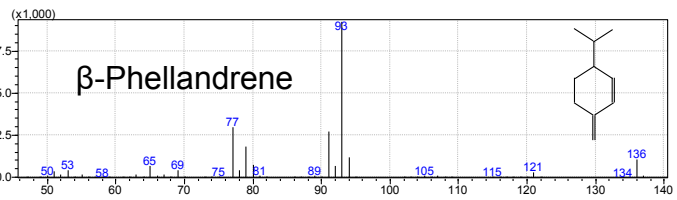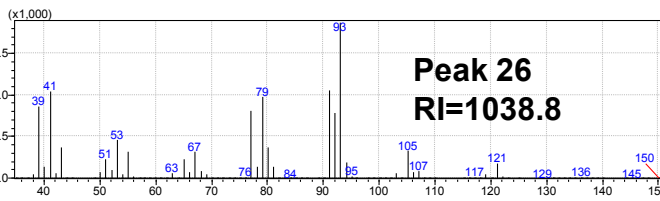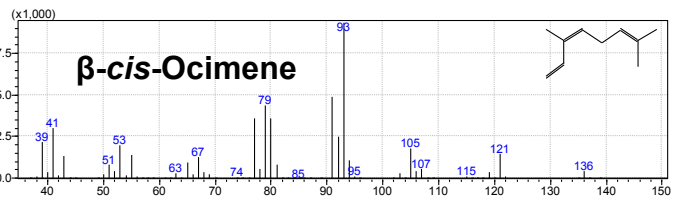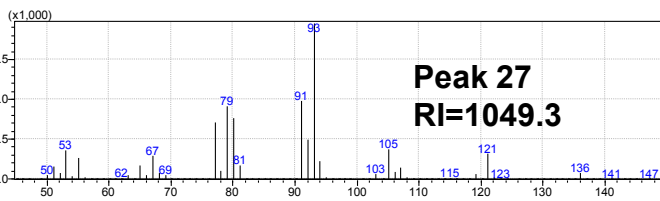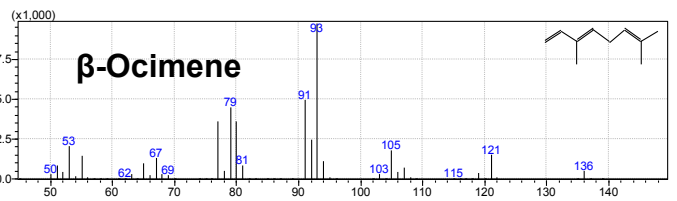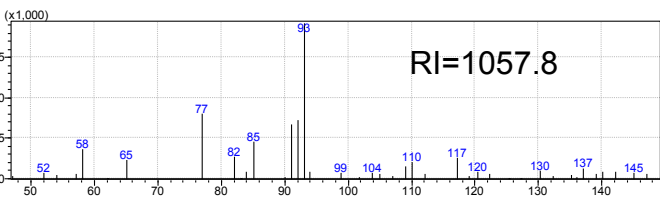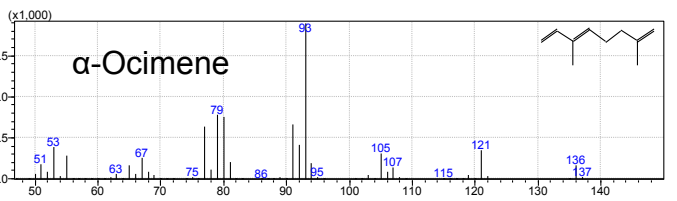

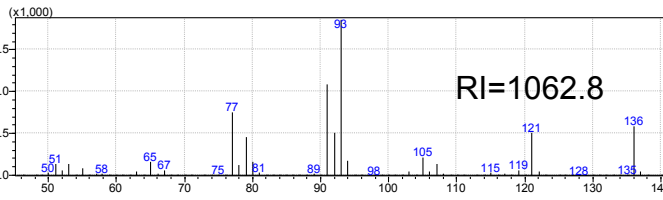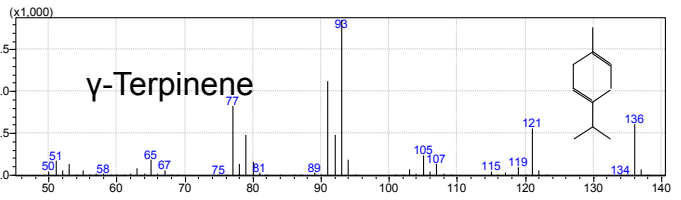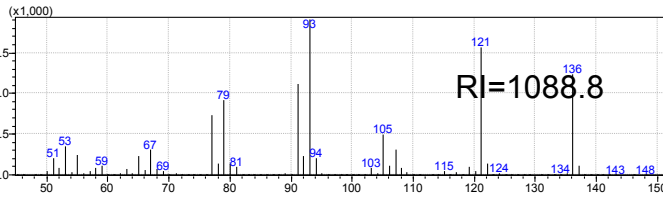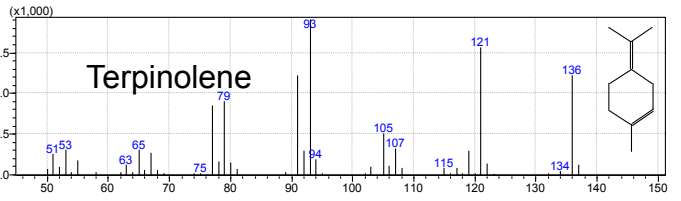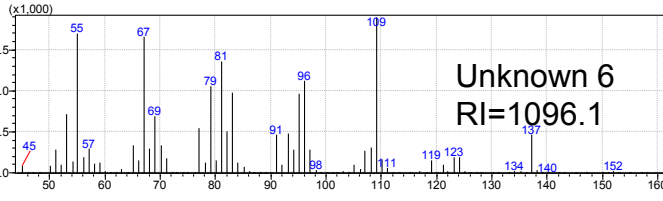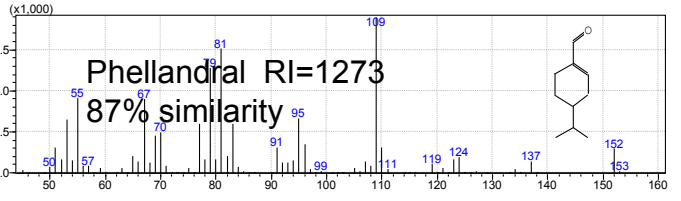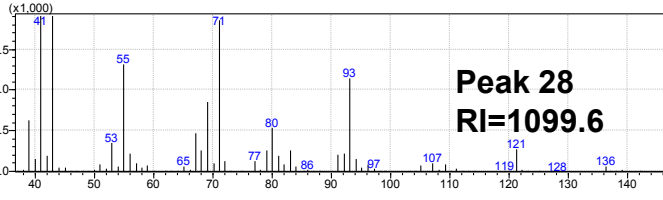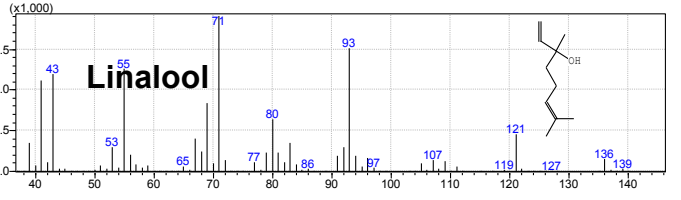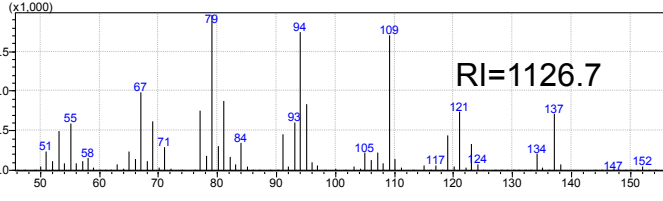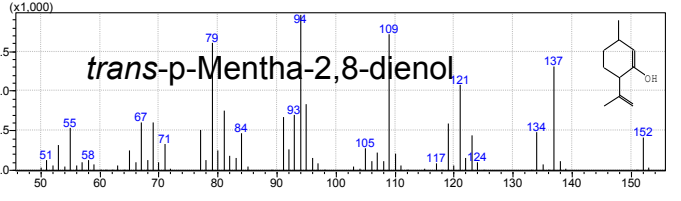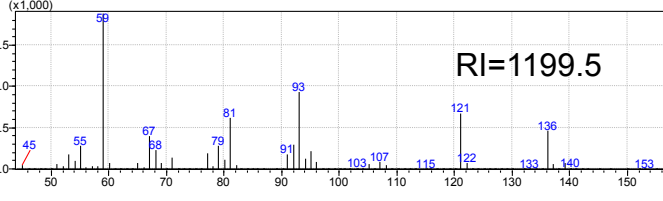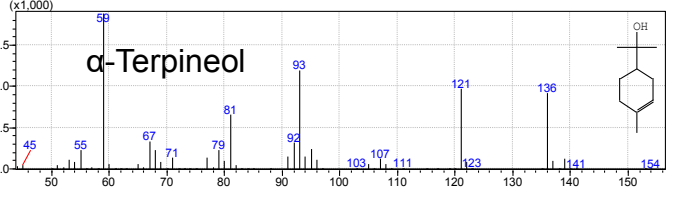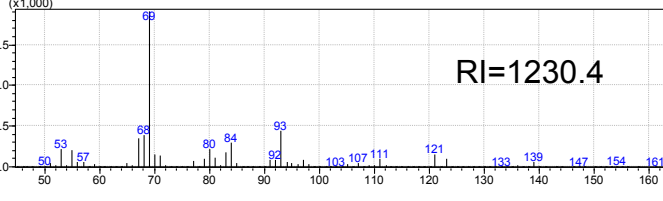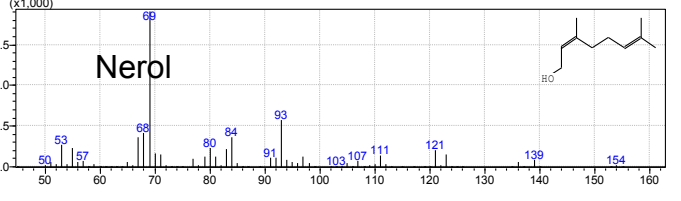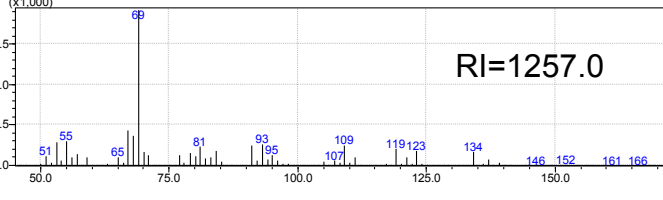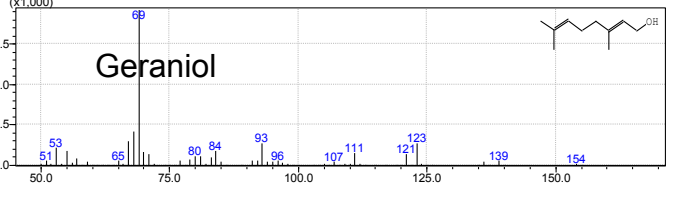



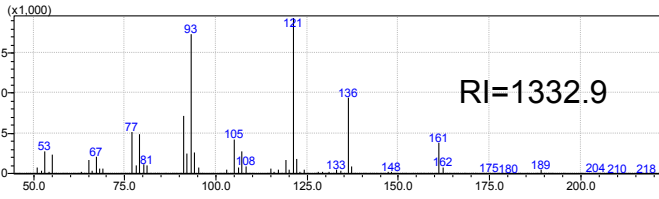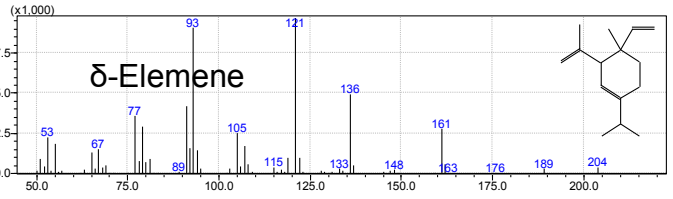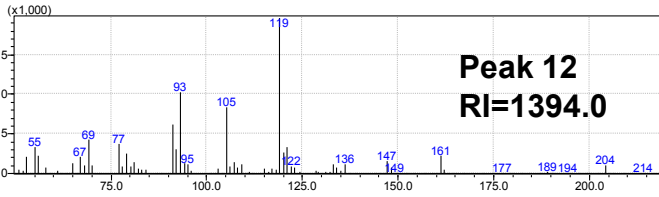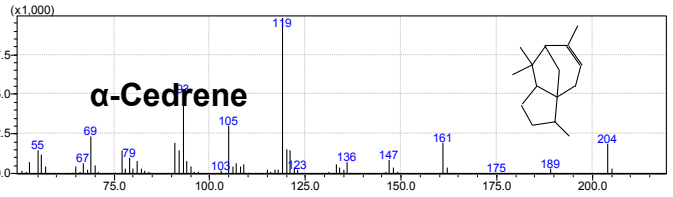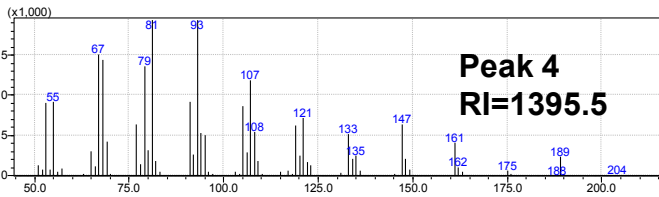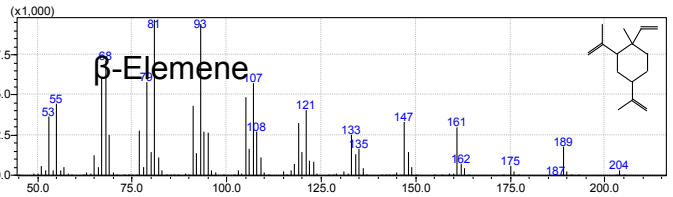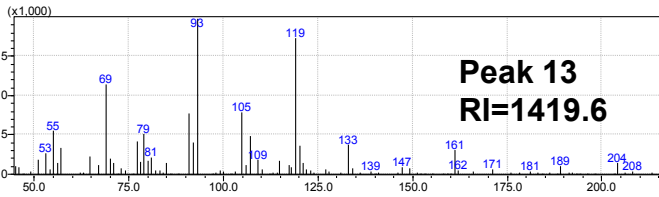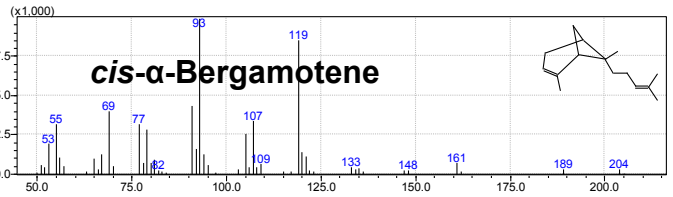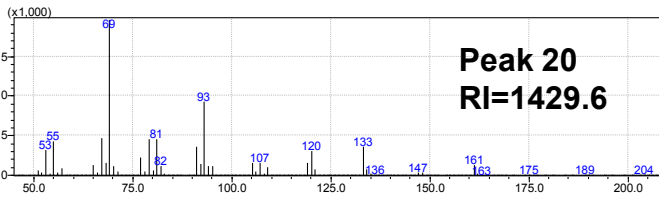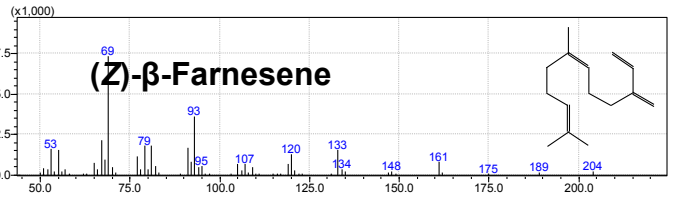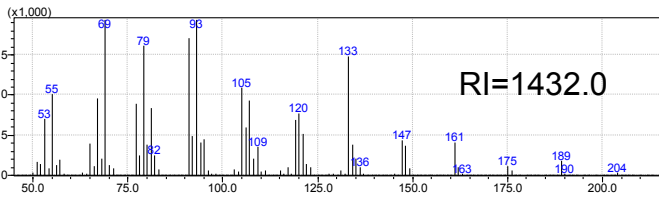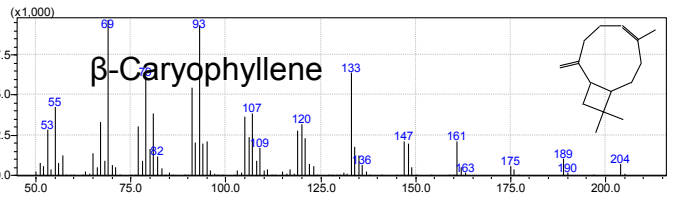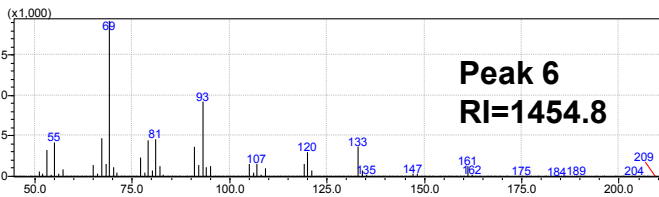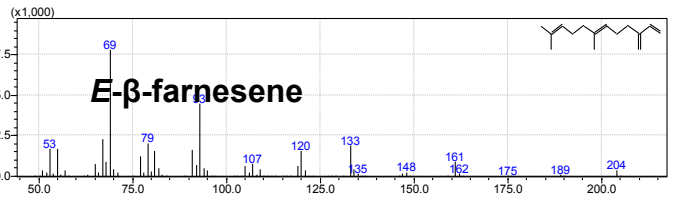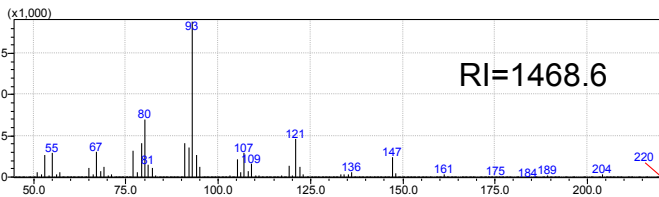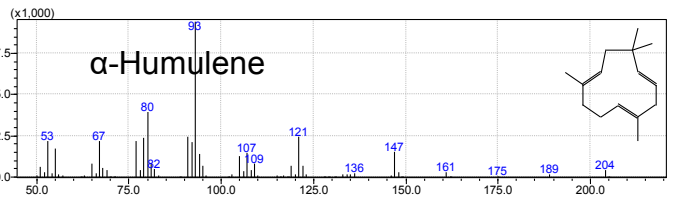

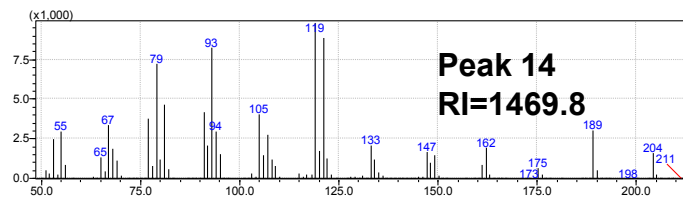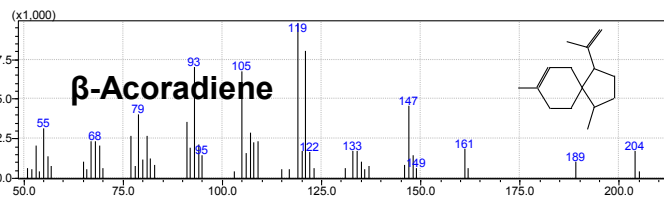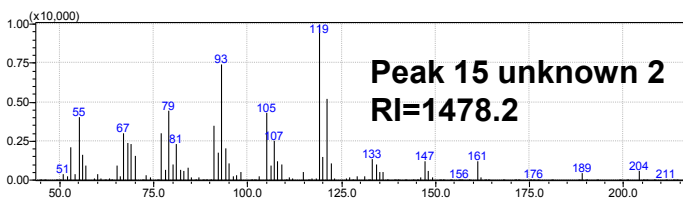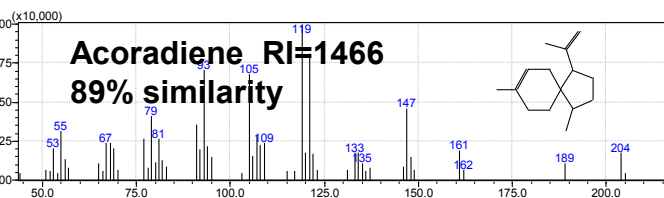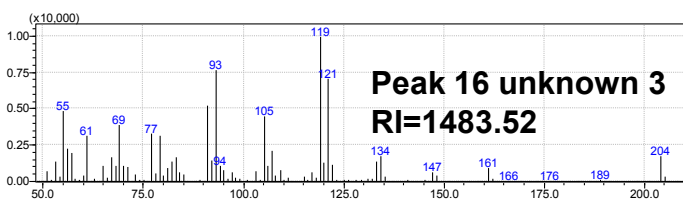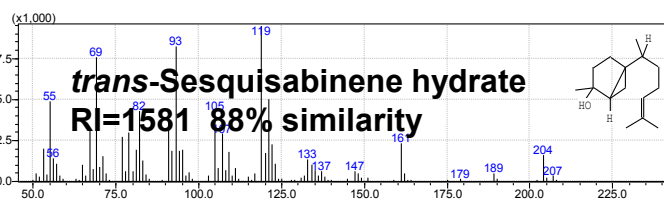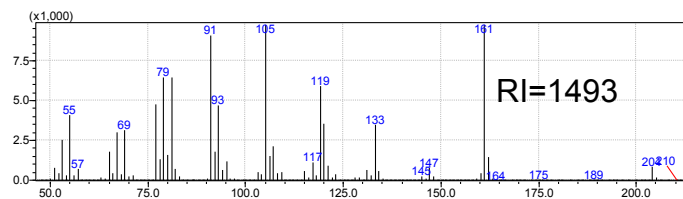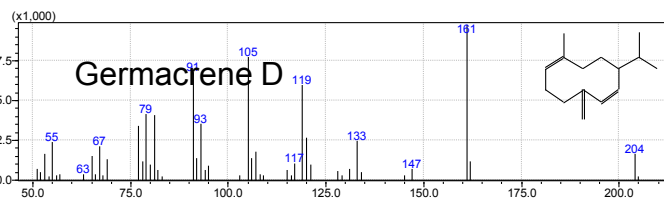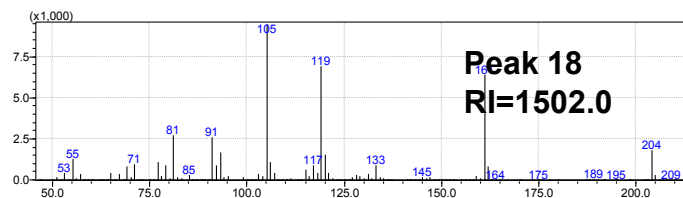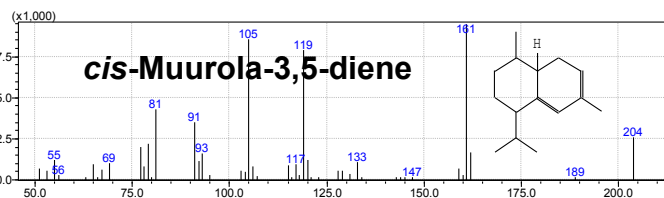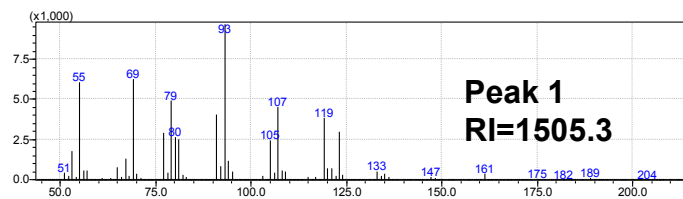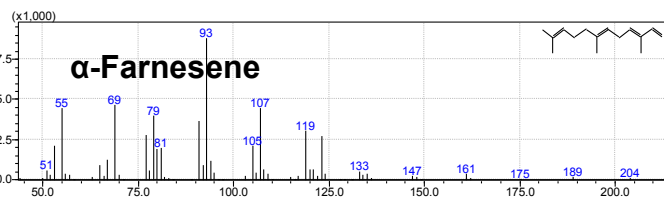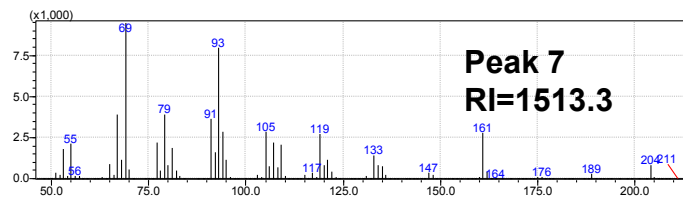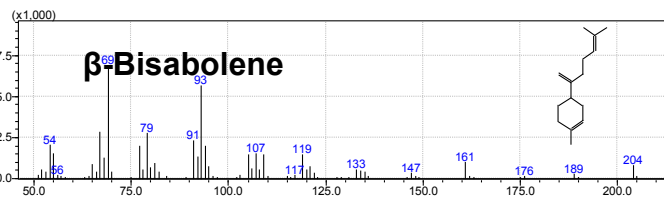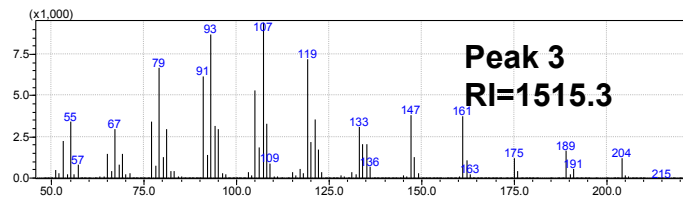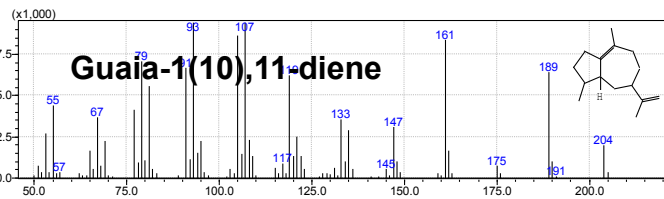

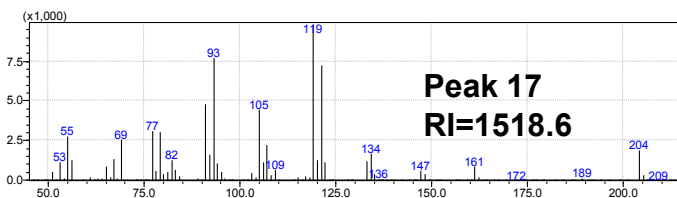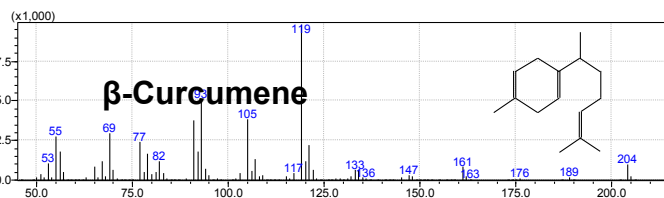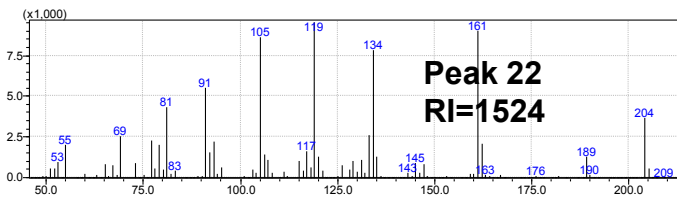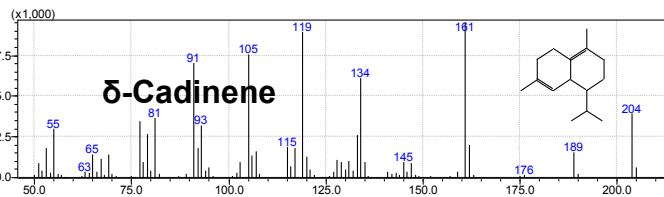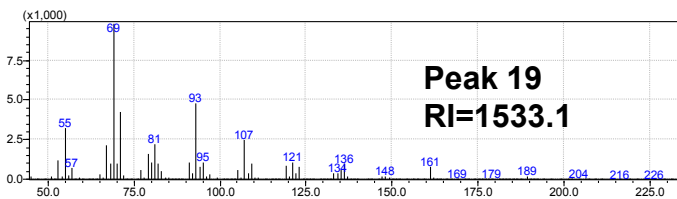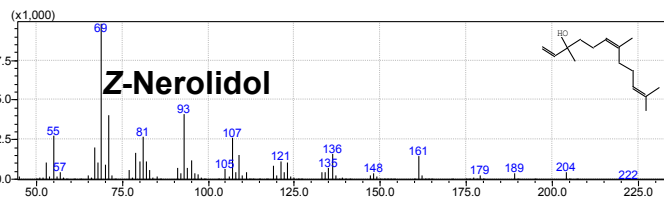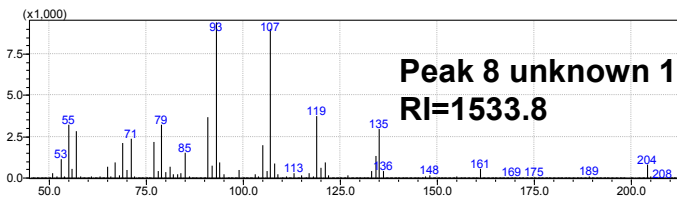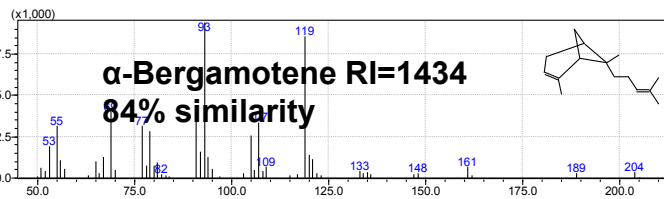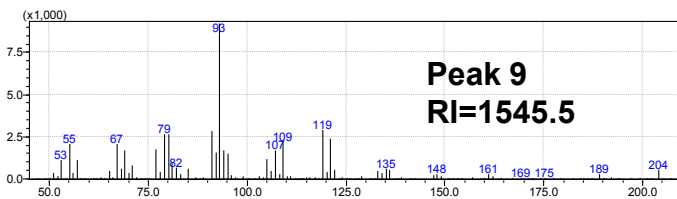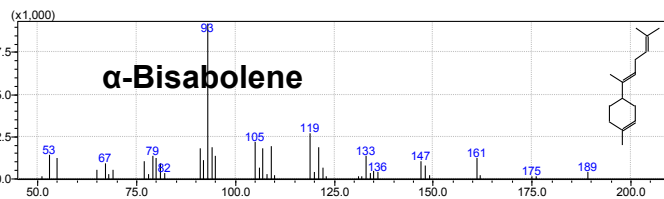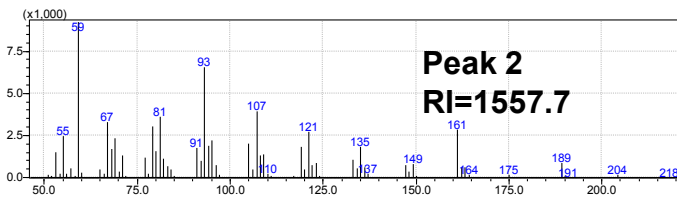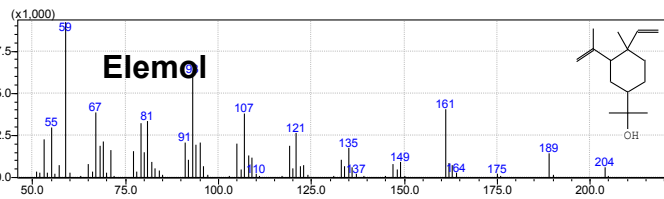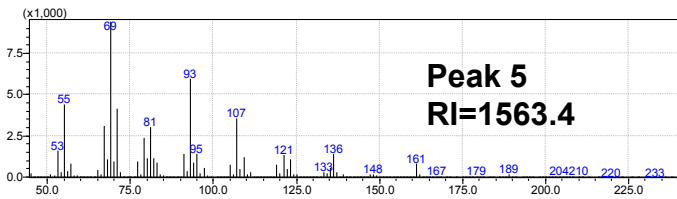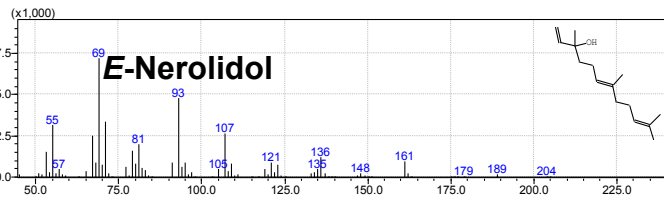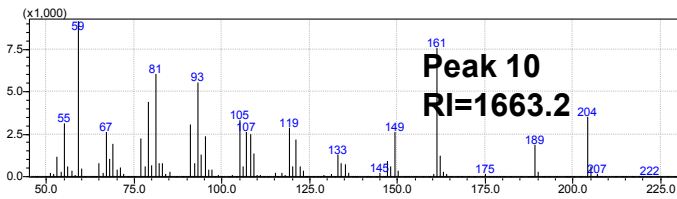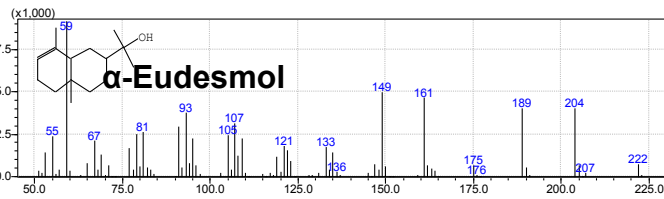

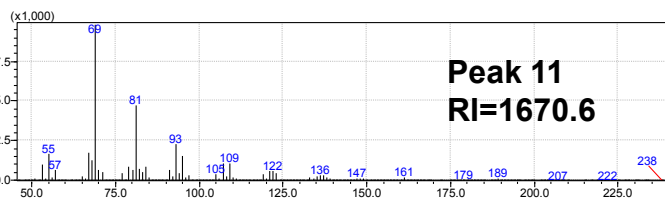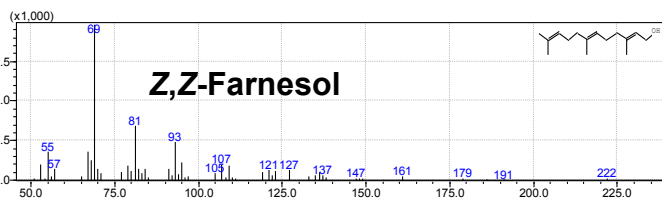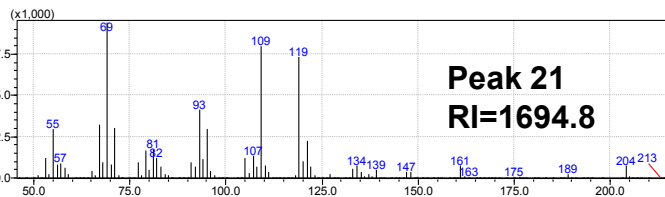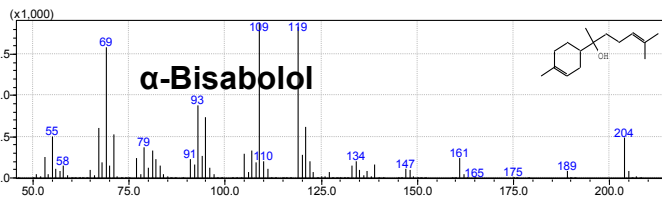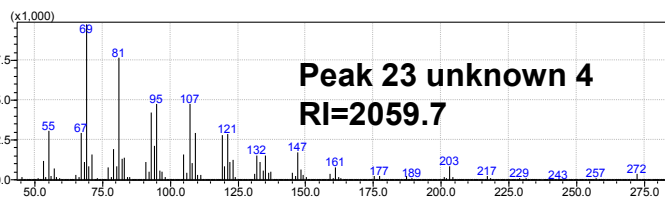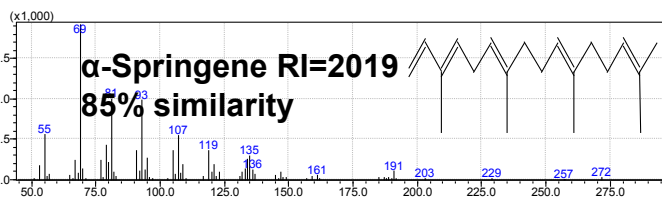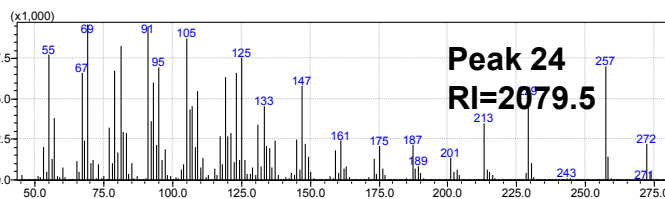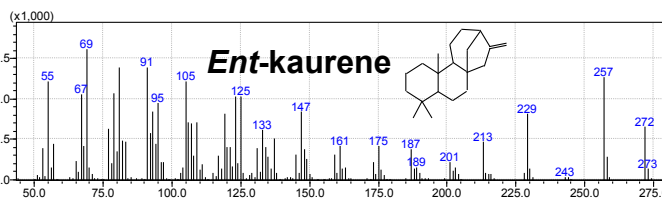

**Fig. S4 GC-MS analysis of elemol and (+)-hedycaryol.** Elemol is the thermal breakdown product of (+)-hedycaryol, which can be detected by lowering the injection port temperature.

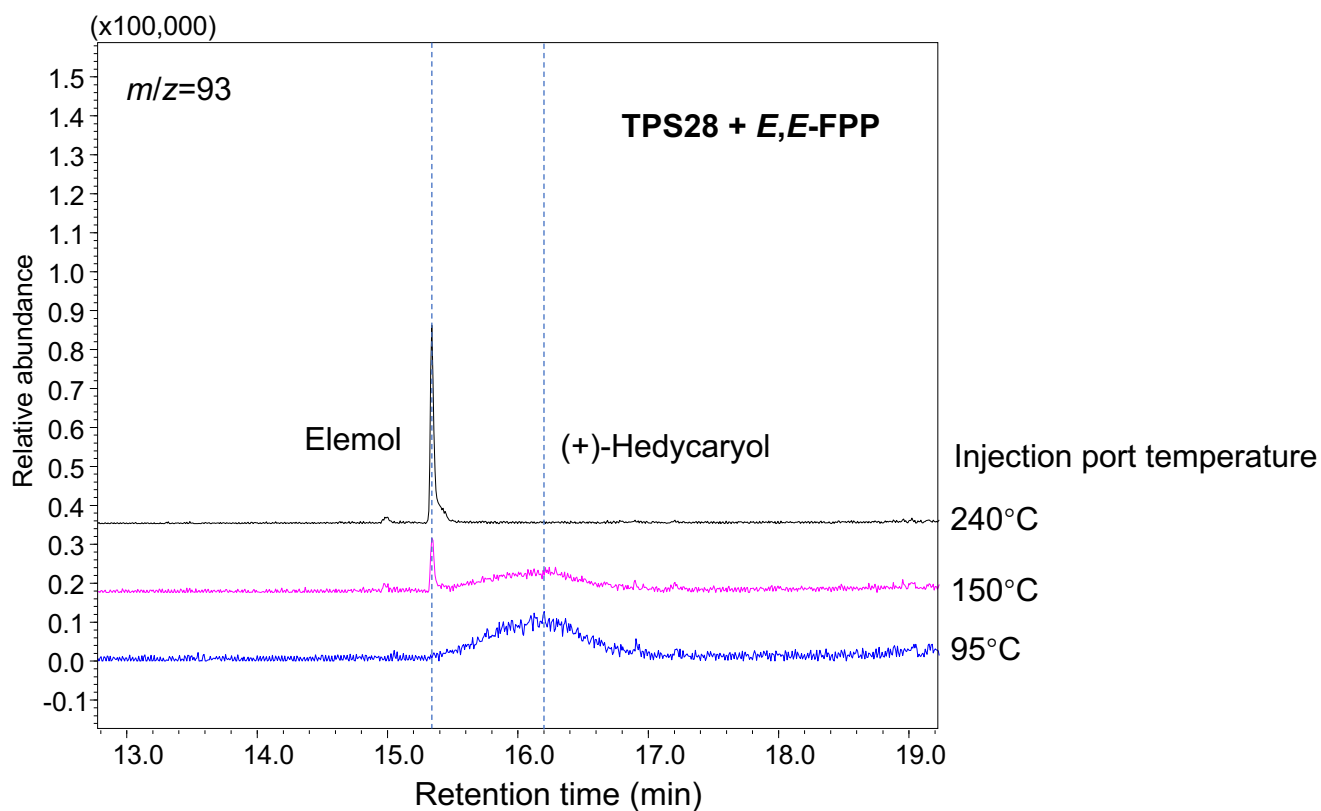

**Fig. S5 GC-MS analysis of the products formed in planta by transiently co-expressing TPS with CPT genes in *Nicotiana benthamiana* leaves.**

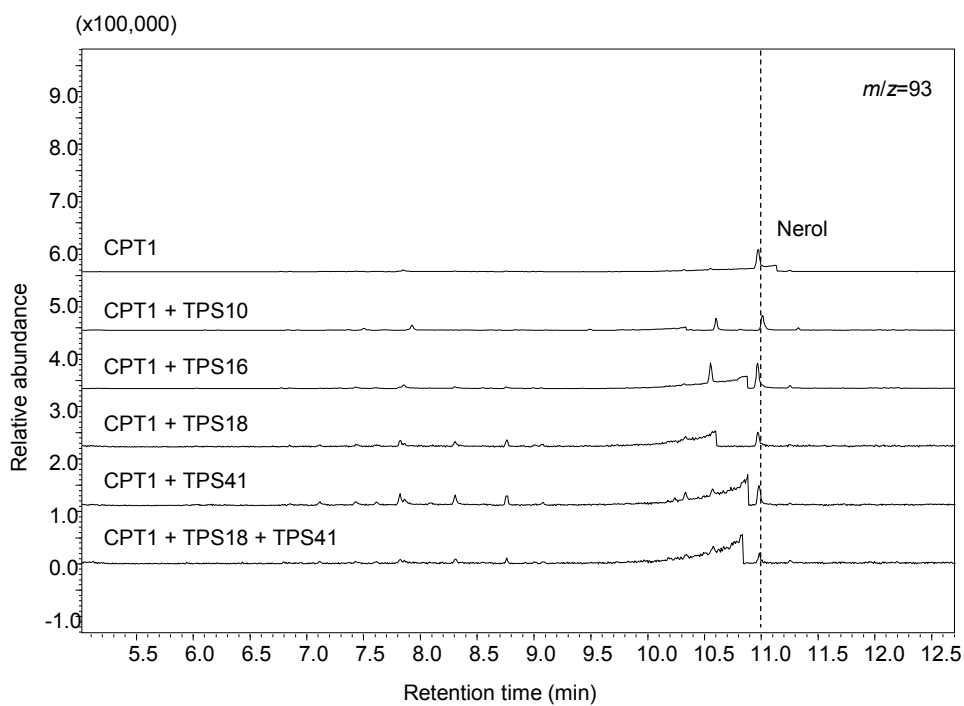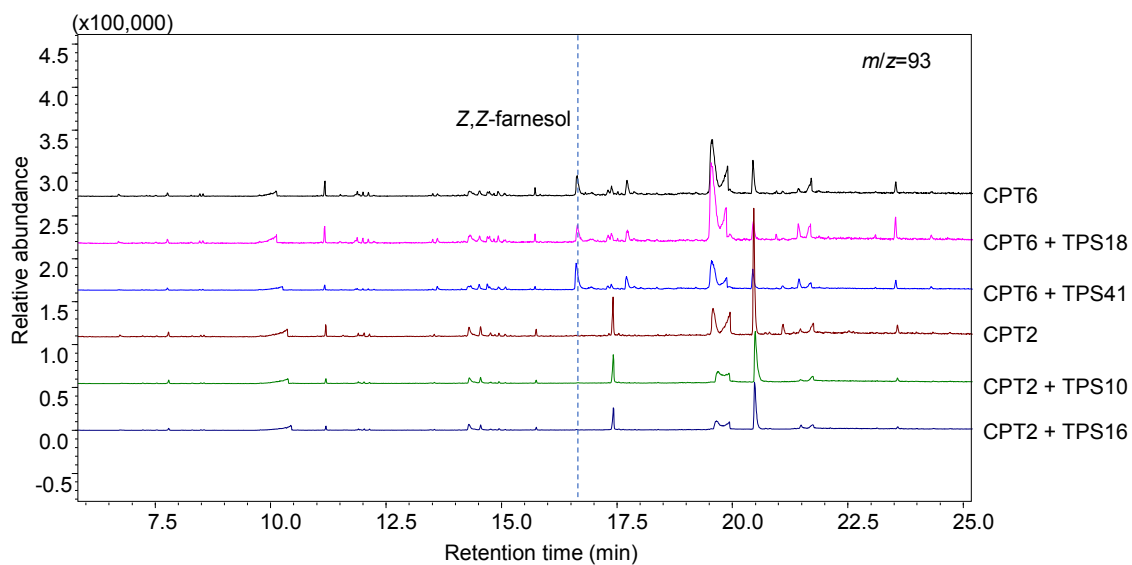

**Fig. S6 Analysis of tomato terpene synthases with isoprene synthases from other plants.** (a) Phylogenetic analysis of 34 tomato TPSs with three functionally characterized isoprene synthases. The three TPSs clustered with known isoprene synthase are shown in bold and shaded in green. (b) Multiple sequence alignment tomato TPSs from TPS-a, TPS-b and TPS-g clades with isoprene synthases. Black shading indicates identical amino acid residues and grey shading are the conserved or semi-conserved substitutions observed and dashes indicate gaps. Amino acids belonging to the ‘isoprene score’ amino acids are shown in red, the calculated “isoprene score” is shown next to each TPS. Among the calculated tomato TPSs, TPS47 has the highest isoprene score and is shown in bold. PalspS, isoprene synthase from *Populus alba* (AB198180); EgIspS, isoprene synthase from *Eucalyptus globulus* (BAF02831.1); PmIspS, isoprene synthase from *Pueraria montana* (AY316691.1).

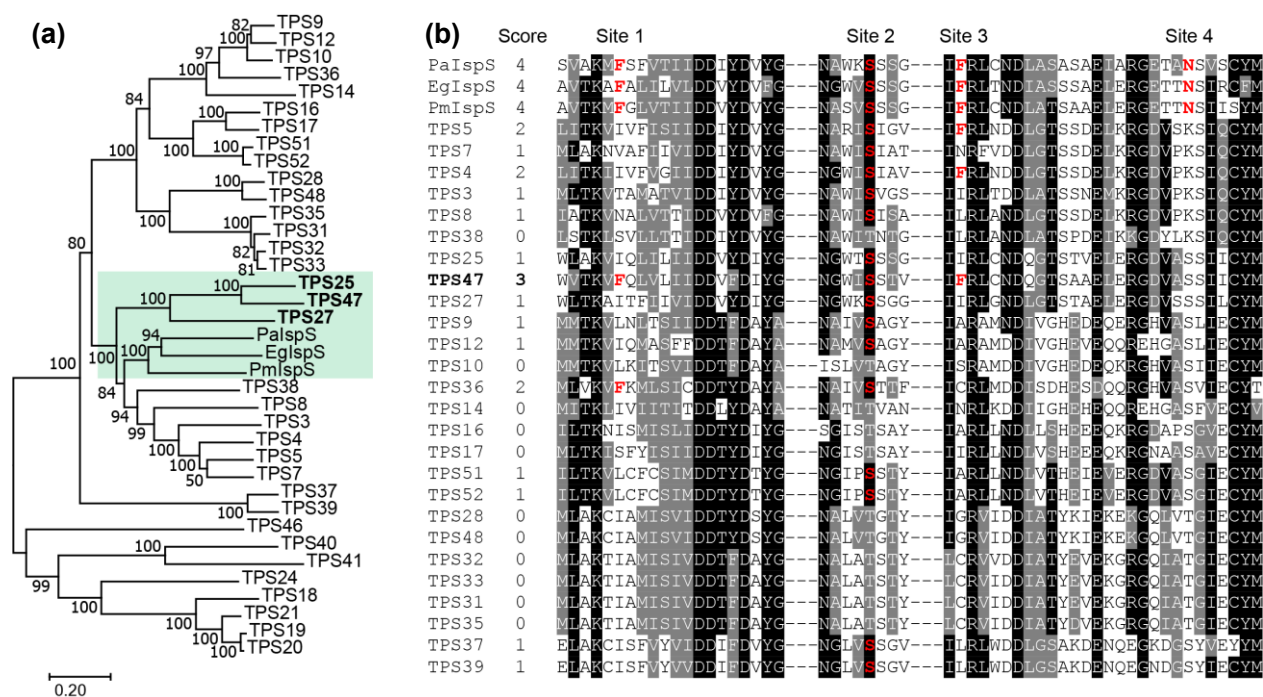

**Fig. S7 Sequence alignment of the proteins encoded by the functional tomato TPS-c genes and CPS genes from other plants.** Black shading indicates identical amino acid residues and grey shading are the conserved or semi-conserved substitutions observed and dashes indicate gaps. The conserved DxDD motif is underlined. The truncation sites for protein expression are indicated with triangle. AtCPS, copalyl diphosphate synthase from *Arabidopsis thaliana* (At4g02780); NtCPS2, 8-hydroxy-copalyl diphosphate from *Nicotiana tabacum* (HE588139.1); OsCPS1<sub>ent</sub>, ent-copalyl diphosphate synthase 1 from *Oryza sativa* (Q6ET36.1); OsCPS2<sub>ent</sub>, ent-copalyl diphosphate synthase 2 from *Oryza sativa* (Q6Z5I0.1); OsCPS3<sub>syn</sub>, syn-copalyl diphosphate synthase 3 from *Oryza sativa* (Q0JF02.1); MtHPS, halimadienyl diphosphate synthase from *Mycobacterium tuberculosis* (NP\_217894); SaCPS, copalyl diphosphate synthase from *Salinispora arenicola* (WP\_012181499.1).

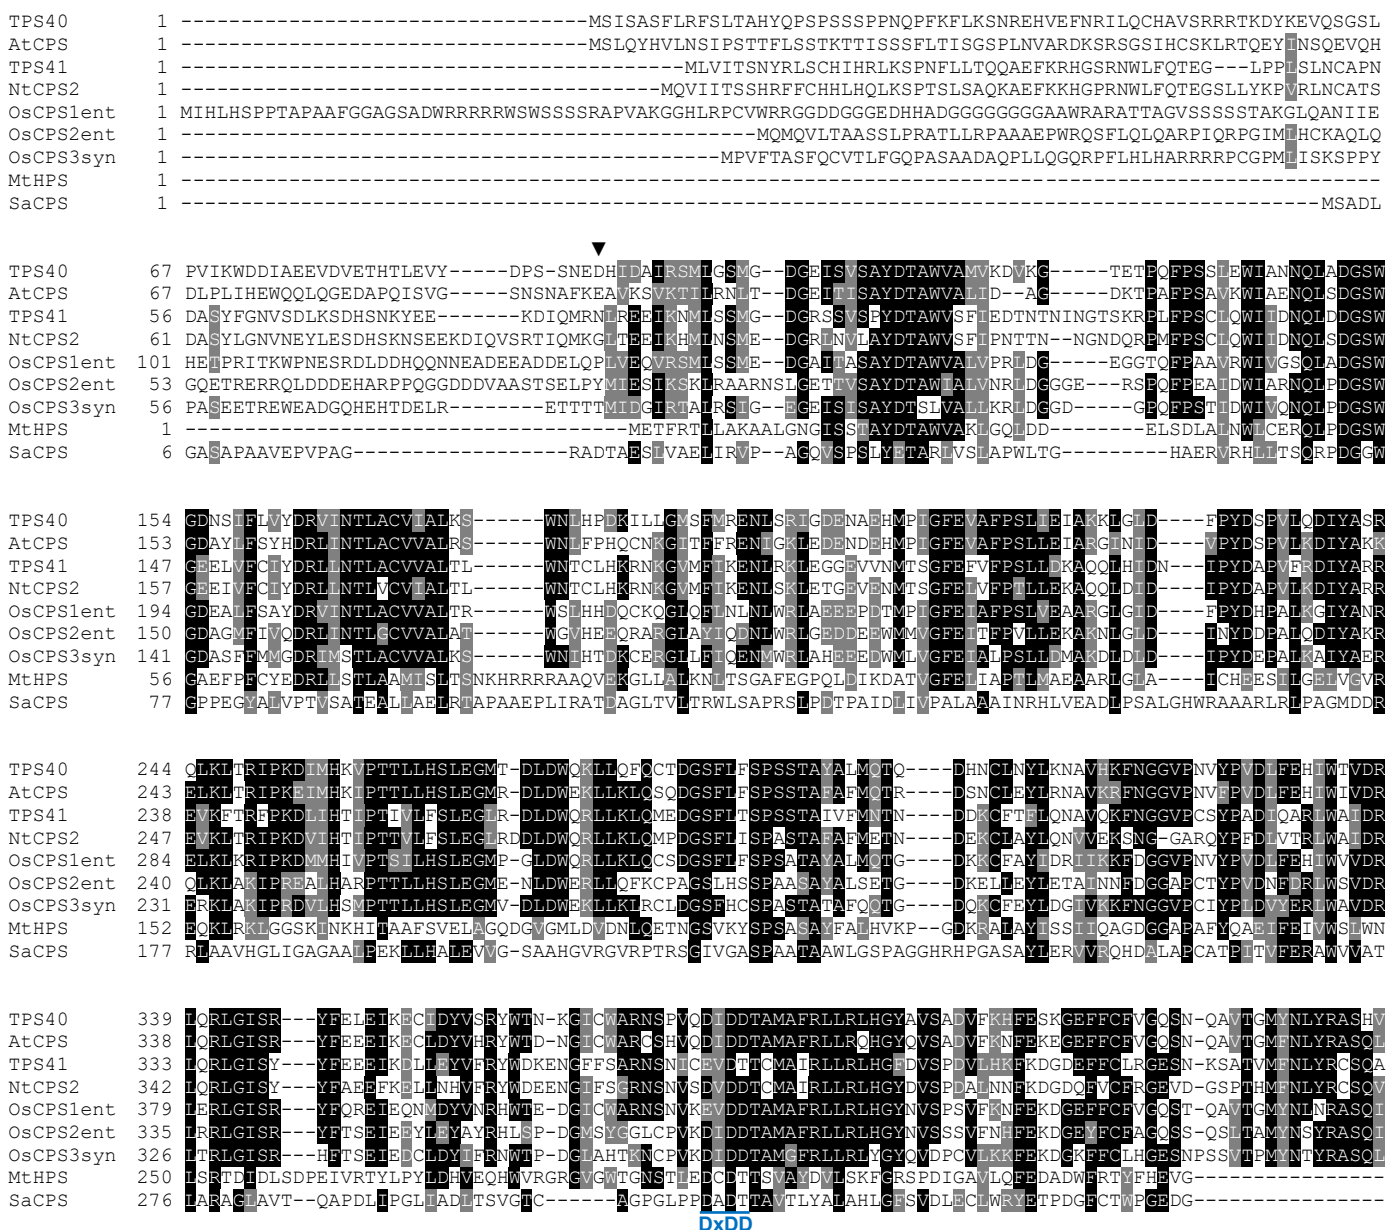



TPS40 434 MFSGEK-ILENAKIFISNYLREKRAQNOILLDKWITTKDLPGEVGYALDVPWYASLPRLEIRFFLEHYGGEEDVWIGKTLYRMPVNNNSIYLELAKSDYNN  
 AtCPS 433 AFRFE-IKNAKEFSYNYLLEKREREREIDKWIIMKDLPEIGFALEIPWYASLPRVEIRFYLDQYGGENDVWIGKTLYRMPVNNNGYLELAKQDYNN  
 TPS41 429 LFPGEI-ICEEAKNFTYNYFLHQYLANNOQSKDKWVIKADIPGEIRYALEFCWYASLPRVEIRLYLDQYGGADETWISKTLYRMPDVSNVYLELAKLDYNN  
 NtCPS2 438 LFPGEK-ILEEAKNFTYNYFLQOCLANNRCLDKWVIKADIPGEIRYALEFCWYASLPRVEIRYLYLDQYGGADETWIGKTLYRMPDVNNNVYLELAKLDYNN  
 OsCPS1ent 474 SFPGED-ILQARNFSEYFLREBAQGTIHDKWIISKDLPGEVGYLDFPWYASLPRVEIRTYLDQYGGNDVWIGKTLYRMPVNNNATYLELAKQDFNR  
 OsCPS2ent 430 VFGDDGLEQIRACRAFLERERATGNIMDKWVIANGLESVEYALDFPWASLPRVEIRVYLEQYGADEDAWIKGLYRMTLVNNDYLELAKADFTN  
 OsCPS3syn 422 KFPGDGVLGRAEVEFCRSFLQDRRCNSRMKDKWVIKADIPGEVGYAMDYPWASLPRLEIRLYLDQYGGSGVWIGKVLFRMTLFCNDYLELAKADESN  
 MthPS 334 -----PSISTNVHVLGALKQAGYDR  
 SaCPS 352 -----FSLSTNAHVLDVGLILTTDPGADRRH

TPS40 533 COALHQEFWRRIKRWIYECGLGEPG----LSEKRLLVYIYLCASIFEAQRSTERMAWVKTAALMDCVRSQFGSPQVSAAAFCEFAHYSSTALNSRYN  
 AtCPS 532 COAQHQLEWDLIHKWWEENRLSEWG----VRRSELLECYLAAATIFESERSHERMVWAKSSVLVKIISSEFGESSDSRRSFSQDFHEYIANARSDHH  
 TPS41 528 CQSQRHFEWLIHQEWEKGNFQKFG----ISKKEVLVSEFLAASSIFEVERSRQLAWAKSCHLCKMITSYINQEATVWN---SFLMEFKNYRDMSIKK  
 NtCPS2 537 CQSQRHFEWLIHQEWEKCNFQOFG----ISKKYLLVSYFLAAASIFEVERSRERLAWAKSRIICCKMITSYINDEATVWTRNSLLMEFKVSHDPTRKN  
 OsCPS1ent 573 COALHQHLELQGLQKWIENGLEAFG----MTPEDVLRAYFLAAACIFEPNRAERLAWARVSVLANTIIRHFYSMDSMKRMERFMWSSLYEENGNVLG  
 OsCPS2ent 530 FORLSRLEWLSIKRWIIRNNLQAHG----VTEQSVLRAYFLAAANIPEPNRAAERLAWARTAILAEIASHLRQYSANGAADGMTERLISGLASHDWDW  
 OsCPS3syn 522 FQKECRVLELNGIRRWILRSNLEKFGGT---DPQTTLMTSYFLASANIPEPNRAAERLAWARVALADAVSSHFRRIGGPKNSTNLEELISLVPFDAYS  
 MthPS 354 CHPRVRKVLFTIRSSKEPGRFCWRDKW---HRSAYYTAHLICAAISNYDDALCSDAIGWILNTQRPDGSGWFFDQQAETAETAYCIQALAHWQRHSG---  
 SaCPS 379 VTAARRLADALRCRQQADGSQDRWHASPHYATMCCALALAGFPGPGTAVTSLARAASWIVDTQRANCSWGRMKGTVEETAYAVQVLATVGRG-----

TPS40 628 TEDR-----LVGVLGTLNHLNLSALLTHG--RDVHHYLRHAWENWLLTVGEGEGEGEGG-----ABELIIRTLNLC  
 AtCPS 627 FNDNRMLDRPGSVQASRLAGVIGTLNQMSFELFMSHG--RDVNNLLYLSGWDWKEKWKLYGDEGE-----LMVKMIILMKN  
 TPS41 620 SNET-----KEIILNNNICQFLHQLIKETYQDLG--KDIHHQLHNVWEWLEENN---TTCQEA-----AVLLVQITNLS  
 NtCPS2 632 GNET-----KEIILNKNRQFLRQLSEETFEDLG--KDIHHQLQNAWETWLVFLREKKNACQEE-----TELLVVRTINLS  
 OsCPS1ent 668 LEGYAKDG-----ILARTICQLDLLSOETPPVREGQKCHHNLIRCAWIEWMMQINMKDGRYDKGRVMHPGSCVHNKETCLLIAQIVEICAGRI  
 OsCPS2ent 625 RESK-----DSAARSLLYALDELIDLHAFGNASDSLREAWKQWLMSTWNE--SQGSTG-----DTALLMVRTIEICS  
 OsCPS3syn 619 G-----SLREAWKQWLMMAWTAKESSQESIEG-----DTAILLMRAIEIFG  
 MthPS 448 -----  
 SaCPS 472 -----

TPS40 692 SVHWISEEILLSHPTQKLEITNRVSHRIR---LYKGHSEKQVGLMTFSEBIEGDMQQLAELVLSHSDASEIDANIKDFTLTVAKSFYYSAYCDDRTIN  
 AtCPS 705 NDLTN---FFTHTHVRLAEIINRICLPRQ---YLKARRNDEK----EKTIKSMKEKMGKMWELALSESDFRVDVSIITFLDVAKAFYYPALCGD-HIQ  
 TPS41 685 S-GHMTHEILS-----KYTNKVCHEMIN---EFCN---DQICNSKARDIELHMQALVKLVFSNTSSNNINQGIEDTFKVVKTFYYTAHVSEETIN  
 NtCPS2 700 G-GYMTHEILFDADVENISNLTNKVCGRLN---ELQN---DKVTGGSKNTNIELDMQALVKLVFGNTSSN-INQDIKQTFFAVVKTFYYSAHVSEETIN  
 OsCPS1ent 759 EEASMINNTEGSWFIQLASSICDSLHAKVYL---LSCDTKKNETTINQIDKIEELGMOELAQYELPRVDDRRINNKTKQTFLSLVKSCYAAANCSPHMLD  
 OsCPS2ent 691 GRHGSAEQSLKNSADVARLEQIASSMCKSLATKILAQ--NGGSMNDVEGIDQEVVDEMKELIQRYVYSS-SNDVSSVTRQTFLDVVKSEFCYVAHCSPETID  
 OsCPS3syn 659 GRHVLTGQRPD-LWEMSQLBQLTSSICCKLISRRVLACENGESTEKEVEEIQQVDIEMQELTRRVLQG--CSAINRLTRBTFLVVKSEFCYVAYCSPETID  
 MthPS 448 -----TSLSAQISRAGGWLSQHCEPPYAPLWIAKTLVYCSATVVVKAAIL  
 SaCPS 472 -----RPGADEAIRRGRAYLTEGTTAHDGPPPLWHDKDLVYRPMIVRAAVV

TPS40 789 FHIAKVLFEERVV--  
 AtCPS 792 THISKVLFQKV---  
 TPS41 770 NHISKVLFQKA---  
 NtCPS2 792 FHISKVLFQQV---  
 OsCPS1ent 856 QHISEVLEEQVI--  
 OsCPS2ent 789 GHISKVLFEDVN--  
 OsCPS3syn 756 SHIDKVLFEQDVI--  
 MthPS 491 SARIRLVDESQ---  
 SaCPS 518 AARHLAGAGPATA

**Fig. S8 Predictions of subcellular localization for TPS and prenyltransferase proteins made by TargetP 1.1 (a) and ChloroP 1.1 (b).**

**(a)** ### targetp v1.1 prediction results #####  
 Number of query sequences: 42  
 Cleavage site predictions not included.  
 Using PLANT networks.

| Name   | Len | cTP   | mTP   | SP    | other | Loc | RC |
|--------|-----|-------|-------|-------|-------|-----|----|
| TPS3   | 607 | 0.781 | 0.218 | 0.044 | 0.036 | C   | 3  |
| TPS4   | 590 | 0.756 | 0.205 | 0.040 | 0.055 | C   | 3  |
| TPS5   | 609 | 0.563 | 0.315 | 0.087 | 0.018 | C   | 4  |
| TPS7   | 592 | 0.499 | 0.155 | 0.233 | 0.054 | C   | 4  |
| TPS8   | 597 | 0.375 | 0.099 | 0.136 | 0.546 | -   | 5  |
| TPS9   | 548 | 0.050 | 0.182 | 0.180 | 0.693 | -   | 3  |
| TPS10  | 556 | 0.166 | 0.244 | 0.083 | 0.313 | -   | 5  |
| TPS12  | 548 | 0.053 | 0.301 | 0.139 | 0.461 | -   | 5  |
| TPS14  | 568 | 0.113 | 0.093 | 0.089 | 0.861 | -   | 2  |
| TPS16  | 553 | 0.075 | 0.144 | 0.059 | 0.858 | -   | 2  |
| TPS17  | 554 | 0.091 | 0.149 | 0.063 | 0.774 | -   | 2  |
| TPS18  | 773 | 0.024 | 0.900 | 0.009 | 0.207 | M   | 2  |
| TPS19  | 778 | 0.612 | 0.323 | 0.014 | 0.133 | C   | 4  |
| TPS20  | 778 | 0.612 | 0.323 | 0.014 | 0.133 | C   | 4  |
| TPS21  | 784 | 0.661 | 0.215 | 0.022 | 0.122 | C   | 3  |
| TPS24  | 820 | 0.930 | 0.035 | 0.075 | 0.070 | C   | 1  |
| TPS25  | 547 | 0.272 | 0.086 | 0.089 | 0.713 | -   | 3  |
| TPS27  | 554 | 0.214 | 0.166 | 0.081 | 0.576 | -   | 4  |
| TPS28  | 554 | 0.169 | 0.129 | 0.125 | 0.725 | -   | 3  |
| TPS31  | 555 | 0.243 | 0.057 | 0.145 | 0.727 | -   | 3  |
| TPS32  | 548 | 0.113 | 0.199 | 0.078 | 0.627 | -   | 3  |
| TPS33  | 552 | 0.171 | 0.123 | 0.193 | 0.514 | -   | 4  |
| TPS35  | 556 | 0.211 | 0.073 | 0.142 | 0.692 | -   | 3  |
| TPS36  | 591 | 0.548 | 0.061 | 0.144 | 0.293 | C   | 4  |
| TPS37  | 560 | 0.547 | 0.206 | 0.055 | 0.092 | C   | 4  |
| TPS38  | 546 | 0.157 | 0.177 | 0.046 | 0.816 | -   | 2  |
| TPS39  | 563 | 0.055 | 0.151 | 0.252 | 0.584 | -   | 4  |
| TPS40  | 800 | 0.921 | 0.093 | 0.038 | 0.044 | C   | 1  |
| TPS41  | 780 | 0.077 | 0.730 | 0.022 | 0.145 | M   | 3  |
| TPS46  | 821 | 0.231 | 0.055 | 0.112 | 0.891 | -   | 2  |
| TPS47  | 562 | 0.096 | 0.239 | 0.083 | 0.649 | -   | 3  |
| TPS48  | 560 | 0.327 | 0.105 | 0.160 | 0.528 | -   | 4  |
| TPS51  | 550 | 0.054 | 0.154 | 0.074 | 0.876 | -   | 2  |
| TPS52  | 551 | 0.038 | 0.359 | 0.059 | 0.720 | -   | 4  |
| FPPS1  | 342 | 0.027 | 0.053 | 0.378 | 0.864 | -   | 3  |
| SSU1   | 315 | 0.019 | 0.278 | 0.057 | 0.600 | -   | 4  |
| SSU2   | 334 | 0.366 | 0.190 | 0.170 | 0.100 | C   | 5  |
| GGPPS3 | 360 | 0.505 | 0.132 | 0.010 | 0.423 | C   | 5  |
| TPT1   | 372 | 0.158 | 0.866 | 0.013 | 0.029 | M   | 2  |
| TPT2   | 373 | 0.178 | 0.785 | 0.009 | 0.053 | M   | 2  |
| GGPPS2 | 363 | 0.322 | 0.082 | 0.028 | 0.170 | C   | 5  |
| GGPPS1 | 365 | 0.823 | 0.085 | 0.074 | 0.119 | C   | 2  |
| cutoff |     | 0.000 | 0.000 | 0.000 | 0.000 |     |    |

**(b)** ### chlorop v1.1 prediction results #####  
 Number of query sequences: 42

| Name   | Length | Score | cTP | CS-score | cTP-length |
|--------|--------|-------|-----|----------|------------|
| TPS3   | 607    | 0.564 | Y   | 2.430    | 28         |
| TPS4   | 590    | 0.550 | Y   | -0.472   | 38         |
| TPS5   | 609    | 0.523 | Y   | -0.094   | 42         |
| TPS7   | 592    | 0.538 | Y   | 5.945    | 45         |
| TPS8   | 597    | 0.443 | -   | -1.415   | 8          |
| TPS9   | 548    | 0.437 | -   | 1.897    | 2          |
| TPS10  | 556    | 0.486 | -   | 1.526    | 4          |
| TPS12  | 548    | 0.446 | -   | 3.181    | 38         |
| TPS14  | 568    | 0.436 | -   | 7.857    | 68         |
| TPS16  | 553    | 0.428 | -   | 7.547    | 9          |
| TPS17  | 554    | 0.427 | -   | 1.932    | 9          |
| TPS18  | 773    | 0.454 | -   | 0.863    | 28         |
| TPS19  | 778    | 0.545 | Y   | 8.925    | 36         |
| TPS20  | 778    | 0.545 | Y   | 8.925    | 36         |
| TPS21  | 784    | 0.528 | Y   | 5.963    | 36         |
| TPS24  | 820    | 0.548 | Y   | 4.184    | 53         |
| TPS25  | 547    | 0.443 | -   | -0.394   | 8          |
| TPS27  | 554    | 0.446 | -   | -0.085   | 33         |
| TPS28  | 554    | 0.433 | -   | -2.312   | 16         |
| TPS31  | 555    | 0.433 | -   | 4.268    | 3          |
| TPS32  | 548    | 0.438 | -   | -0.872   | 12         |
| TPS33  | 552    | 0.442 | -   | 6.280    | 3          |
| TPS35  | 556    | 0.436 | -   | 6.941    | 3          |
| TPS36  | 591    | 0.485 | -   | 3.693    | 41         |
| TPS37  | 560    | 0.505 | Y   | 8.499    | 30         |
| TPS38  | 546    | 0.432 | -   | -2.033   | 13         |
| TPS39  | 563    | 0.444 | -   | -0.156   | 86         |
| TPS40  | 800    | 0.548 | Y   | 2.548    | 46         |
| TPS41  | 780    | 0.462 | -   | -0.630   | 26         |
| TPS46  | 821    | 0.446 | -   | -1.743   | 13         |
| TPS47  | 562    | 0.436 | -   | 5.568    | 61         |
| TPS48  | 560    | 0.469 | -   | 0.624    | 42         |
| TPS51  | 550    | 0.427 | -   | 1.403    | 29         |
| TPS52  | 551    | 0.428 | -   | 2.759    | 34         |
| FPPS1  | 342    | 0.432 | -   | 1.534    | 12         |
| SSU1   | 315    | 0.439 | -   | 7.229    | 22         |
| SSU2   | 334    | 0.512 | Y   | 5.161    | 17         |
| GGPPS3 | 360    | 0.567 | Y   | 5.148    | 65         |
| TPT1   | 372    | 0.506 | Y   | 2.832    | 13         |
| TPT2   | 373    | 0.507 | Y   | 3.003    | 13         |
| GGPPS2 | 363    | 0.528 | Y   | 4.003    | 63         |
| GGPPS1 | 365    | 0.553 | Y   | 3.695    | 43         |

**Fig. S9 Phylogenetic analysis of tomato TPT homologs and TPTs identified in other plants.** The maximum likelihood phylogenetic tree was constructed using MEGA7 with default settings. The first two letters in each of the homologs are abbreviations for the species: Aa, *Artemisia annua*; Ag, *Abies grandis*; At, *Arabidopsis thaliana*; Am, *Antirrhinum majus*; Cb, *Clarkia breweri*; Cr, *Catharanthus roseus*; Hb, *Hevea brasiliensis*; Hl, *Humulus lupulus*; La, *Lupinus albus*; Mi, *Mangifera indica*; Mp, *Mentha piperita*; Nt, *Nicotiana tabacum*; Os, *Oryza sativa*; Pa, *Picea abies*; Sa, *Sinapis alba*; Vv, *Vitis vinifera*; Zm, *Zea mays*. The GenBank accession numbers of the proteins used in the phylogenetic analysis can be found in Methods S1. The tomato TPT homologs are shown in bold. TPT1, TPT2 and the four Arabidopsis GFPP synthases are shaded in red.

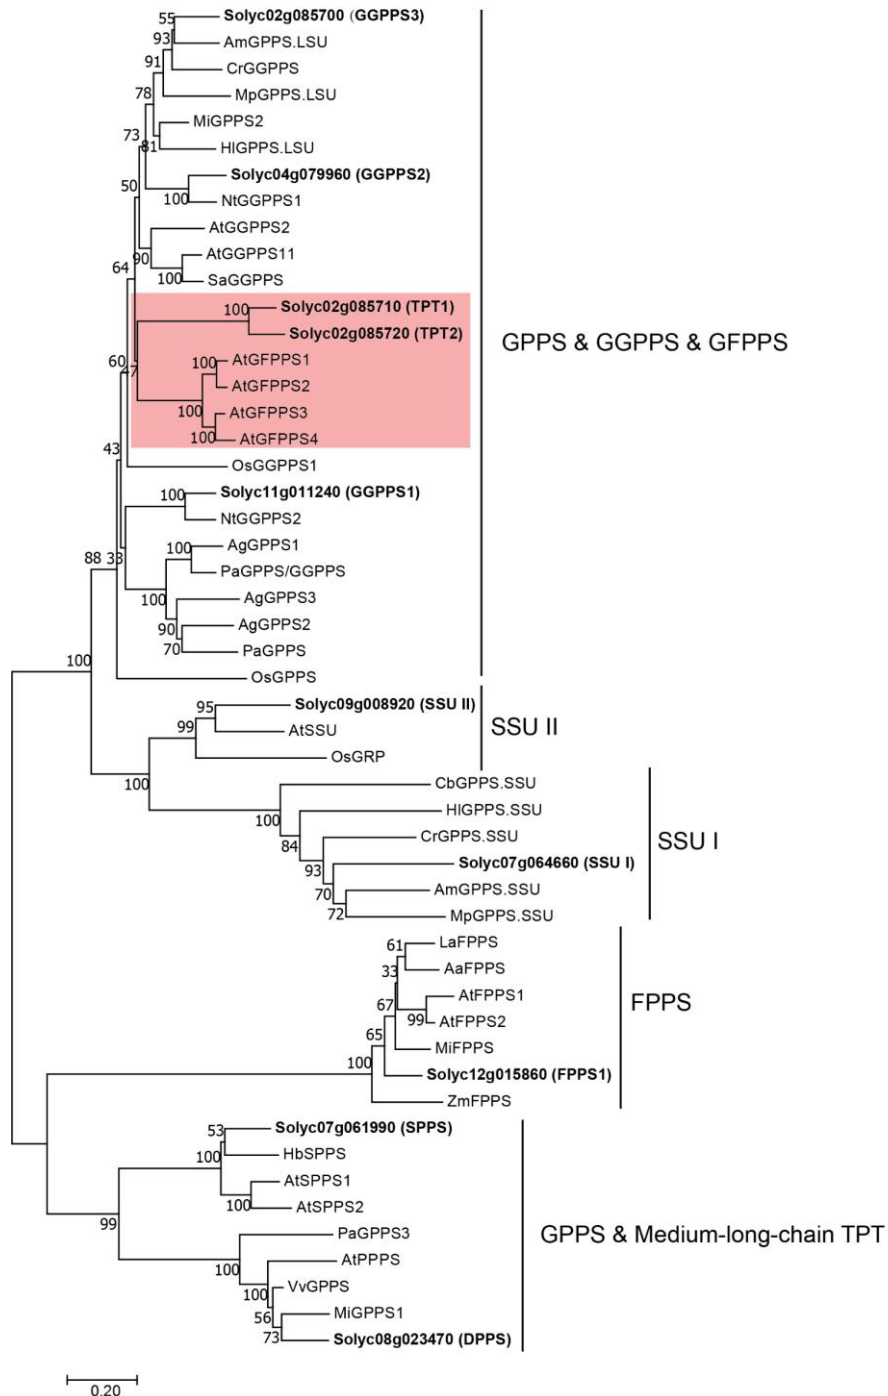

**Fig. S10 GC-MS analysis of the products formed in planta by transiently co-expressing TPS with TPT genes in *Nicotiana benthamiana* leaves.** Transit peptide truncated versions (“d”) of all tested genes were transiently expressed in tobacco cytosol, co-expression of *AtGFPPS2* with *AtTPS19* was used as a positive control to produce the sesterterpene (-)-retigeranin B (Shao *et al.*, 2017).

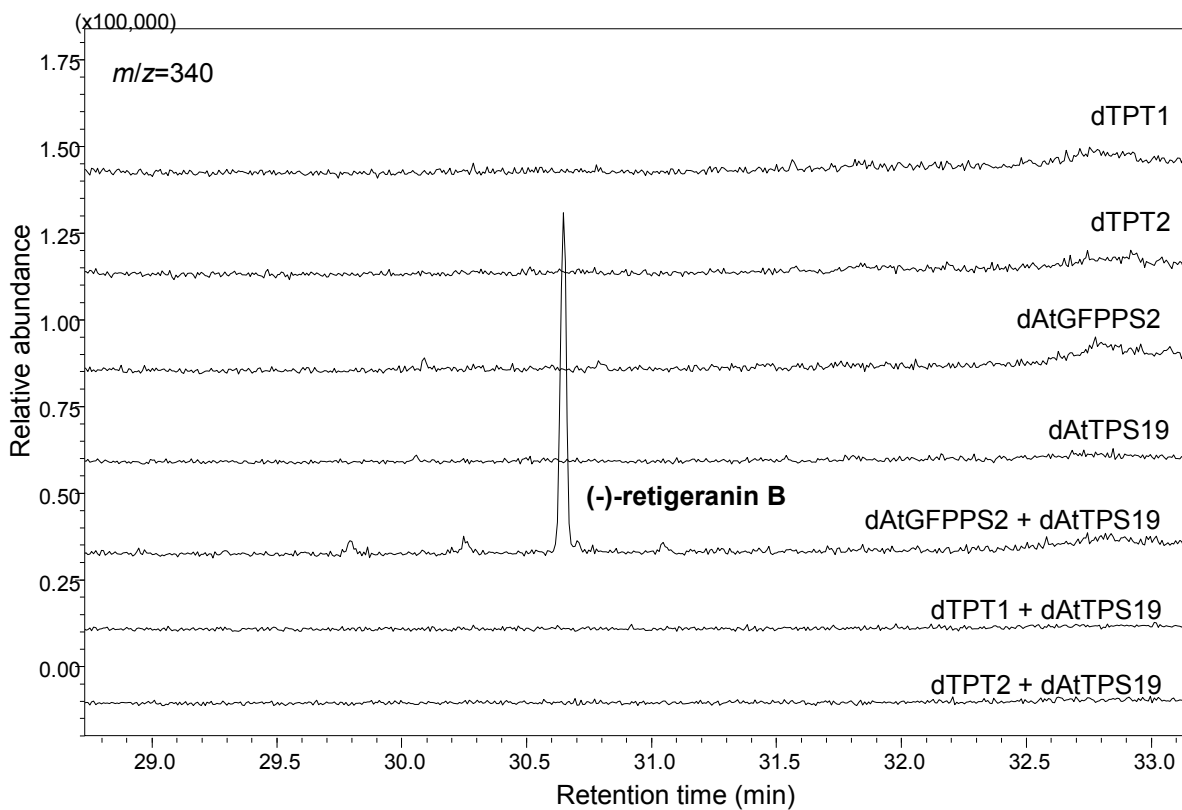

**Fig. S11 Sequence alignment of five Arabidopsis sesterterpene synthases and tomato TPSs from TPS-a, TPS-b and TPS-g clades.** (a) Key residues determining the substrate specificity of sesterterpene synthases are shown in red, the corresponding residues of tomato TPSs are shown in blue. Black shading indicates identical amino acid residues and grey shading are the conserved or semi-conserved substitutions observed and dashes indicate gaps. (b) Amino acids with large side chain (shaded in red) from tomato TPSs. (c) Amino acids with small side chain (shaded in yellow) from Arabidopsis sesterterpene synthases.

|     |         |     |               |                  |
|-----|---------|-----|---------------|------------------|
| (a) | TPS5    | 323 | F-SRDIIVENMF  | FWAVGALFEPQHS    |
|     | TPS7    | 305 | F-SRDRLVEDF   | FWSVGLAFAEPQHS   |
|     | TPS4    | 303 | F-SRNRILVENLF | FWAGTINFEPQHS    |
|     | TPS3    | 315 | F-ARDRIVEAF   | QWITGMIFESQEN    |
|     | TPS8    | 286 | F-ARDRIVENF   | FWITGVNIFLPOYG   |
|     | TPS38   | 259 | F-VRDRIVEGEF  | FWAVGFTPNPQNG    |
|     | TPS25   | 265 | F-TRRIRIVESF  | FWAGTASEGEHG     |
|     | TPS47   | 273 | F-TRDRIVECF   | YAGGIGSKPQOG     |
|     | TPS27   | 269 | F-SRDRIVESF   | LWSVGVAFAEPQHS   |
|     | AtTPS30 | 317 | C-VRDRIVET    | YFPTLGLYFEPRES   |
|     | AtTPS17 | 315 | Y-IRDRIVEV    | YFGALALYFEPQYS   |
|     | AtTPS25 | 316 | Y-SIRERNVET   | YLGGLGVLFEPQYS   |
|     | AtTPS18 | 317 | Y-IRDRIVES    | HLGGLGPFYFEPQYS  |
|     | AtTPS19 | 314 | Y-IRDRSVES    | HLGGLGPFYFEPQYS  |
|     | TPS9    | 261 | Y-ARDRIVE     | CYFWILGVYFEPQYS  |
|     | TPS12   | 260 | Y-ARDRIVE     | CYFWILGVYFEPQYS  |
|     | TPS10   | 266 | Y-ARDRIVE     | CYFWILGVYFEPQYS  |
|     | TPS36   | 301 | Y-ARDKIVE     | GYFWTLGVYFEPQYS  |
|     | TPS14   | 280 | Y-ARDKIVE     | CYFWATGVYFGPQYK  |
|     | TPS16   | 264 | Y-VRDRIAE     | VYFWSLGVYFEPQYS  |
|     | TPS17   | 267 | Y-ARDRIVE     | CYFWCLGPFYFEPQYS |
|     | TPS51   | 262 | F-ARDRVV      | ELYFWSLGVYFEPQYS |
|     | TPS52   | 263 | F-ARDRVV      | ELYFWSLGVYFEPQYS |
|     | TPS28   | 266 | Y-VRDRM       | VCEFWTVGVYFEPQYS |
|     | TPS48   | 272 | Y-VRDRM       | VCEFWAVGVYFEPQYS |
|     | TPS32   | 262 | Y-ARDRAV      | ECYFWTMGVYAEQYS  |
|     | TPS33   | 266 | Y-ARDRAV      | ECYFWTMGVYAEQYS  |
|     | TPS31   | 269 | Y-ARDRAV      | ECYFWTMGVYAEQYS  |
|     | TPS35   | 270 | Y-ARDRAV      | ECYFWTMGVYAEQYS  |
|     | TPS37   | 279 | L-IRDQPL      | KWYFWPMALTDPRKMS |
|     | TPS39   | 280 | L-IRDQPL      | KWYFWPMALTDPRKMS |

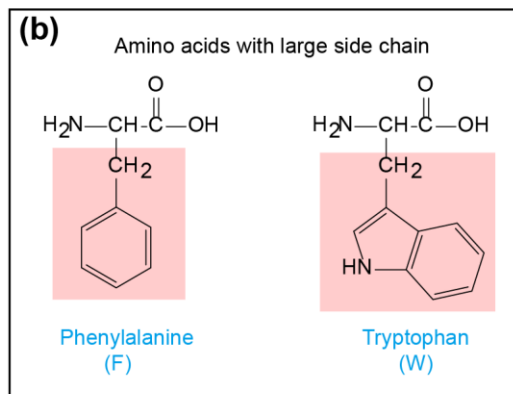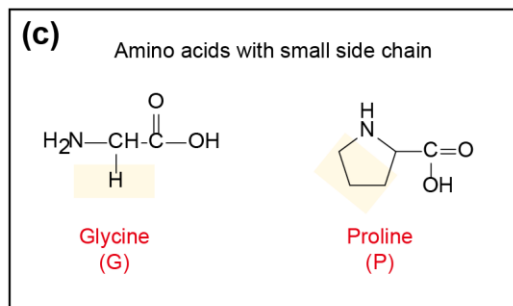

**Fig. S12** Sequence alignment of the proteins encoded by the functional tomato TPS-a genes. Black shading indicates identical amino acid residues and grey shading are the conserved or semi-conserved substitutions observed and dashes indicate gaps. The conserved R(R,P,H,L)(x)<sub>8</sub>W and DDxxD motifs are underlined. The truncation sites for protein expression in *E. coli* are indicated with triangle.

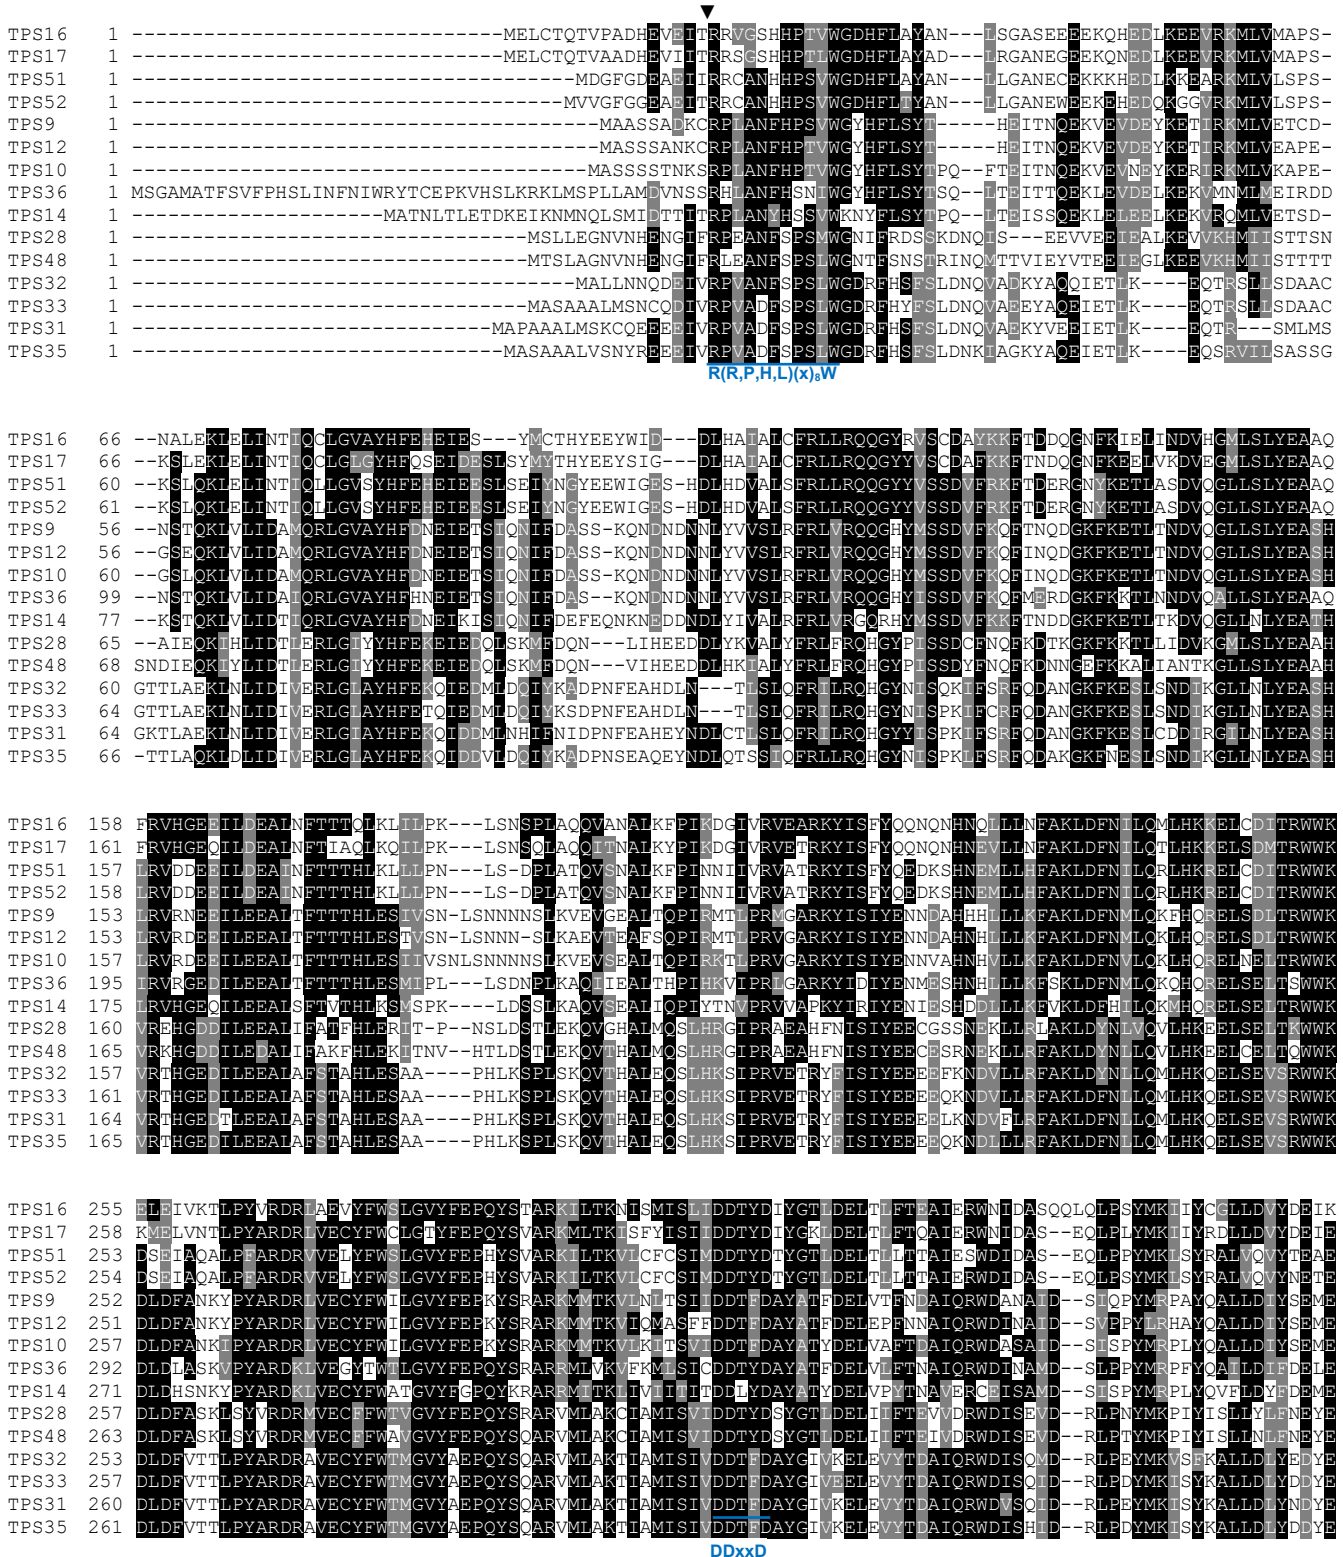

TPS16 355 KDLANE--NKSFLVNSINEMKKVMAYFOEAKWY-GKTI PKMEEYKSGISTSAVQVATTSWLGMGNVATKDSFDWVNEPFIIVASSI IARLINDL  
TPS17 356 KELANE--NKSFLVNSINEMKKVVRGYFOEAKWY-GKKVPTMEQYKNGISTSAVILLTTTSLWLMGNVATKDAFDWVATEPPIIVASCYIIRLINDL  
TPS51 351 RELENLGNKMTFRVKYSINEMKKLIRAYFOEAKWYH-GKDVPTMEQYKNGIPSSITYLLATTSWLGMGDVAIKDAFDWVSNPEFIIVASSI IARLINDL  
TPS52 352 KELENLGNKMTYRVKYSINEMKKLIRAYFOEAKWYH-GKDVPTMEQYKNGIPSSITYLLATTSWLGMGDVAIKDAFDWVSNPEFIIVASSI IARLINDL  
TPS9 350 QVLSKDG--KLDRVVYAKNEMKKLVRAYFKEAQWLNDCDHPKYEEHQENAVSAGYMMISTTCLVGEFEFISHETFEWLMNESVIWRASAI IARANDI  
TPS12 349 QALAKEF--KSDRVVYAKNEMKKLVRAYFKEAQWLNDCDHPKYEEHQENAVSAGYMMGATTCLVGEFEFISKETFEWLINEPLIWRASSI IARAMDDI  
TPS10 355 QVLSNEG--KLDRVVYAKNEMKKLVRAYFKEAQWLNDCDHPKYEEHQENAVSAGYMMGATTCLVGEFEFISKETFEWLMNESVIWRASAI IARANDI  
TPS36 390 EELTKEG--KSDRVVYAKNEMKKLVRAYFKEAQWLNDCDHPKYEEHQENAVSAGYMMGATTCLVGEFEFISKETFEWLMNESVIWRASAI IARANDI  
TPS14 369 EELTKDG--KAHYVYAKNEMKKLVRAYFKEAQWLNDCDHPKYEEHQENAVSAGYMMGATTCLVGEFEFISKETFEWLMNESVIWRASAI IARANDI  
TPS28 355 REINE--QDRFNGVNVYKEMKELVRNYIEAEWFI-EGKIPSEFEYINNAVVTGTYLLAPASLLGMESTS-KRTFDWMMKPKIIVASAI IGRVIDDI  
TPS48 361 IELTELE-QDRFNGVNVYKEMKELVRNYIEAEWFI-EGKIPSEFEYINNAVVTGTYLLAPASLLGMESTS-KRTFDWMMKPKIIVASAI IGRVIDDI  
TPS32 351 KELSK--DGRSDVVQYAKERMKEIVRNYFVEAKWEI-EGYMPVSEYLSNALATSTYYLLTTTSLYLGKVSAT-KEDFEWLAKNPKILBANVTLCRVDDI  
TPS33 355 TELS K--DGRSDVVQYAKERMKEIVRNYFVEAKWEI-EGYMPVSEYLSNALATSTYYLLTTTSLYLGKVSAT-KEDFEWLAKNPKILBANVTLCRVDDI  
TPS31 358 TELS N--DGRSDVVQYAKERMKEIVRNYFVEAKWEI-EGYMPVSEYLSNALATSTYYLLTTTSLYLGKVSAT-KEDFEWLAKNPKILBANVTLCRVDDI  
TPS35 359 TELS K--DGRSDVVQYAKERMKEIVRNYFVEAKWEI-EGYMPVSEYLSNALATSTYYLLTTTSLYLGKVSAN-KEDFEWLAKNPKILBANVTLCRVDDI

TPS16 452 LSHBEEQKRGDAPSGVECYMKEYGVTKEEAHKIRNTIENSWKDLYEEYFVNGTITPRVLLMCHINLARVIEFFIYK-DEDAYTFPKNNLKDVIYRILLD  
TPS17 453 VSHBEEQKRGNAASAVECYMNEYSVTKEEAHKIRNTIENYWKDLYEEYFVNDMIITPRVLLMCHINLARVIEFFIYK-DEDAYTFSKNNLKDVISDILLVD  
TPS51 450 VTHEIEVBERGDVASGIECYMNEYGATKEEAYMETRKTIEENWKLNRGCLKP--ITVPRVLLMPVNLNLRVAEFFYK-DEDAYTFSTNNLKDVISLVLVD  
TPS52 451 VTHEIEVBERGDVASGIECYMNEYGATKEEAYMEIRKLIENWKLNRGCLKP--ITVPRVLLMPVNLNLRVAEFFYK-DEDAYTFSKNNLKDVISMLLVD  
TPS9 448 VGHDEDEQRGHVASTIECYMKDYGASKQETYSKFLKEVINAWKDINKOFFRP--TEVPMFVLERVNLNLRVADTIYK-EKDTYNAKGLKNMINSILIE  
TPS12 447 VGHVEQOREHGASIECYMKDYGVSKQEAAYVKFQKEVINWMDINREFFCPD-VEVPKFVLERVNLNLRVINTIYK-EKDEYTNKSGKFKNMIIISLLVE  
TPS10 453 VGHDEDEQRGHVASTIECYMKEYGASKQEAAYAKFKKEVINWWDINKOFFRP--TEVPMFVLERALNLFARVITDIYQ-EVDGYTNSKGLLKDVLNSSLIE  
TPS36 487 SDHSDQQRGHVASTIECYMKEYGASKQEAAYVKFRKEVKDAWKGNKALLRP--IEVPIFVLRILNLRVARTMDFHQQDEEDGYTNSNSKCKDITVTLILLVD  
TPS14 466 IGHHEQOREHGASIECYMKEYGASKQEAAYVEARRQIANAWKDINTDYLHA--TOVPTFVLPALNLSRLVDIIEQE---DDETDSONFLKDTIKLIFVD  
TPS28 451 ATYKTEKKGQVITGIECYMDENNLSVEKASQALSEIAEAWKDLNKECIKTTSNTIPNEILMRVNLRLRIDVYKNNODGYSNPKNNVKSVEIALLVN  
TPS48 458 ATYKTEKKGQVITGIECYMDENNLSVEEASQALSEIAEAWKDLNKECIKSTDS-MPTEILMRVNLRLRIDVYKNNODGYSDPKNNVKAMIEALLVN  
TPS32 447 ATYVEKGRGQIATGIECYMRDYGVSIOVAMDKFQEAETAWKDVNEGILR--PTPVSTELTRILNLRARIIDVYKNNODGYTHPEKVLKPHIALLVD  
TPS33 451 ATYVEKGRGQIATGIECYMRDYGVSIOVAMDKFQEAETAWKDVNEGILR--PTPVSTELTRILNLRARIIDVYKNNODGYTHPEKVLKPHIALLVD  
TPS31 454 ATYVEKGRGQIATGIECYMRDYGVSIOVAMDKFQEAETAWKDVNEGILR--PTPVSAKILTRILNLRARIIDVYKNNODGYTHPEKVLKPHIALLVD  
TPS35 455 ATYVVEKGRGQIATGIECYMRDYGVSIEAEMKFEAEETAWKDVNEGILR--PTPVSTELTRILNLRARIIDVYKNNODGYTHPEKVLKPHIALLVD

TPS16 551 PII-----  
TPS17 552 PII-----  
TPS51 547 PITT----  
TPS52 548 PIKA----  
TPS9 545 SVKI----  
TPS12 545 SVEI----  
TPS10 550 SVKTSIS-  
TPS36 585 SVTIGRS-  
TPS14 561 SVNSTSCG  
TPS28 551 PINM----  
TPS48 557 SIKL----  
TPS32 545 SIEI----  
TPS33 549 SVEI----  
TPS31 552 SIEI----  
TPS35 553 SIEI----

**Fig. S13 Sequence alignment of the proteins encoded by the functional tomato TPS-b and TPS-g genes.**

Black shading indicates identical amino acid residues and grey shading are the conserved or semi-conserved substitutions observed and dashes indicate gaps. The conserved RR(x)<sub>8</sub>W and DDxxD motifs are underlined. The truncation sites for protein expression in *E. coli* are indicated with triangle.

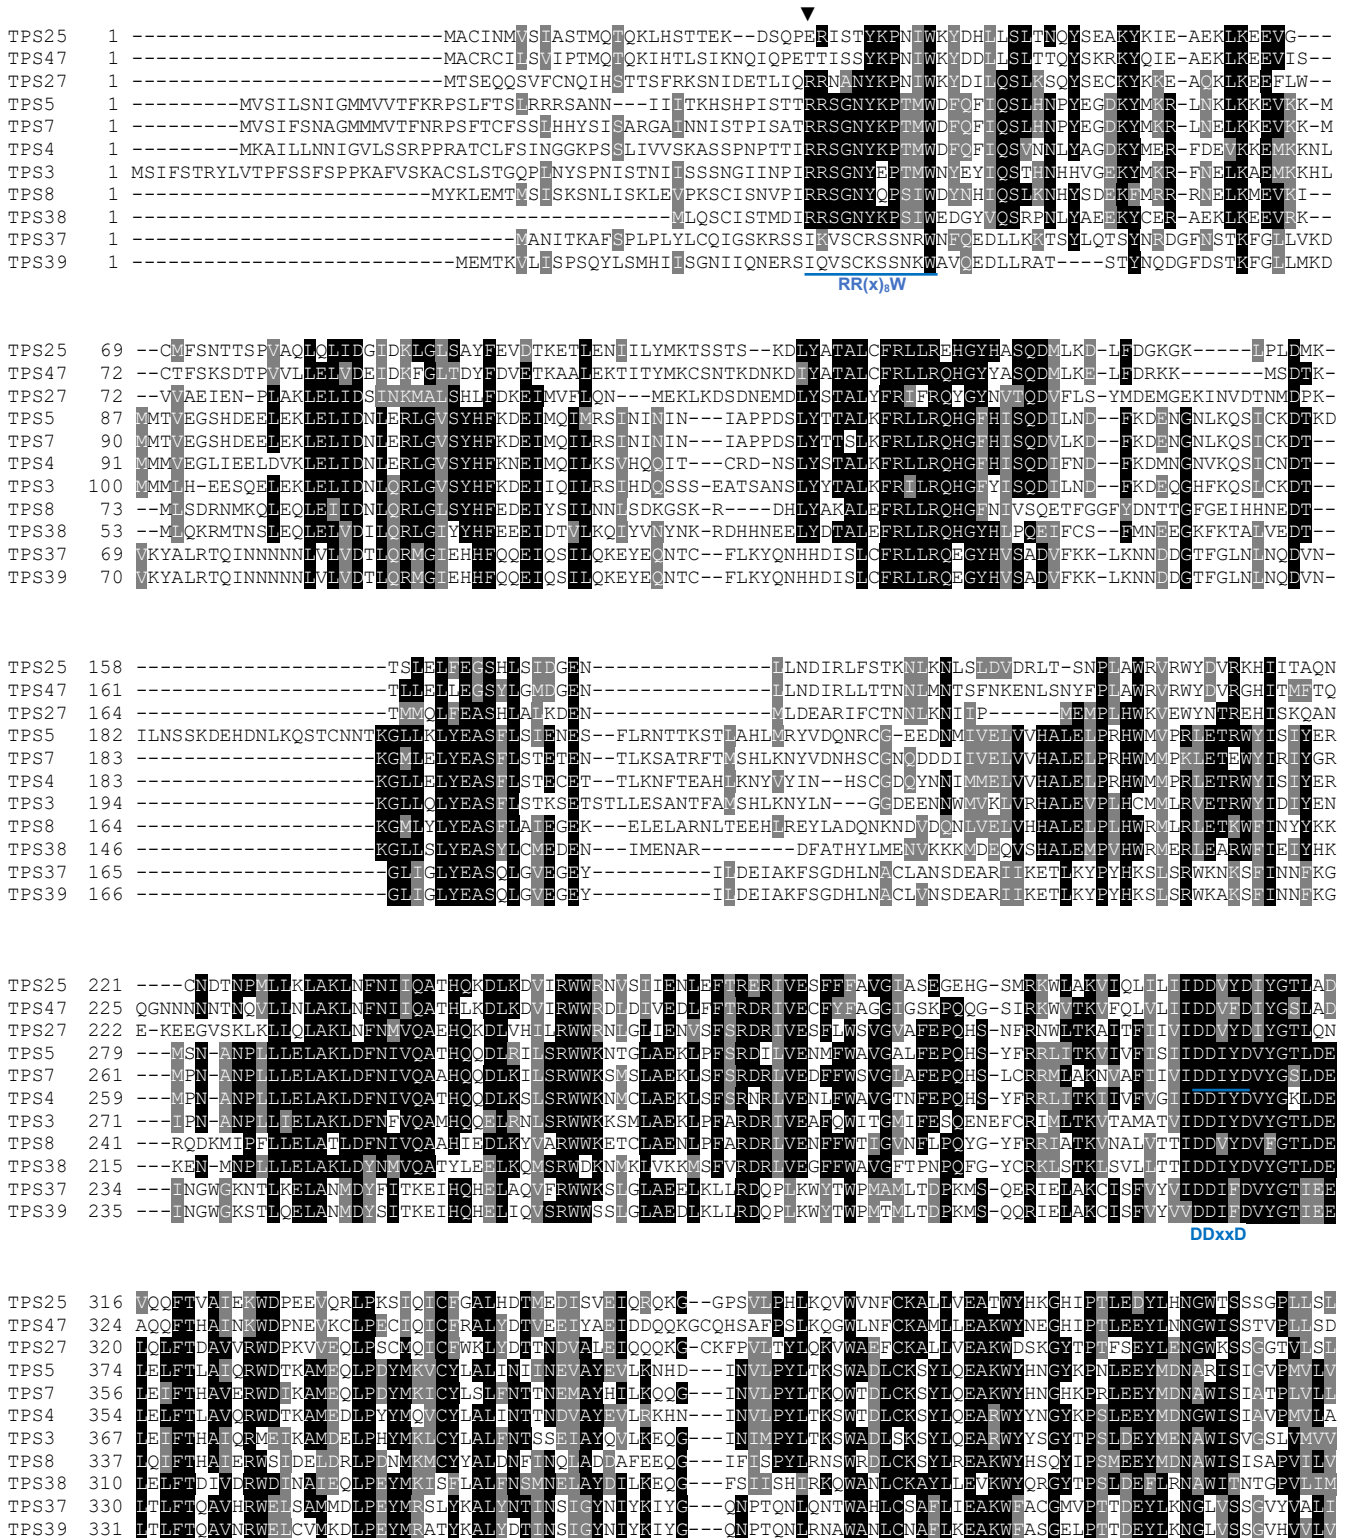



TPS25 414 HVILGLTN----ENLHLCK-NCOEIIYYTSLIIRLCNDQGTSAEELRGRDVASSIICYMH-QENVSEEDVAREHIESIILNSWEKTN-YHFNRLSTSHRK  
TPS47 424 YVIWGLTNNKIITNESLDSSN-NCOEIIYHTSVIFRLCNDQGTSAEELRGRDVASSIICYMQ-QENVSEEDVAREHIESIILDSWKKIN-YHFNTLSMSHRE  
TPS27 419 HVLLGLAODFS--QDYFLE-NERDLIYYSSLIIRLGNLDGTSIAELRGRDVSSSILCYMR-KENVKEDVARKHIEEMVLETWKKMN-RHCFENSS---P  
TPS5 471 HSLFLVTNQITKEALDLSLTN--YPDIIIRWSAIIIRLNDLGTSSDELKRGDVSKSIQCYMN-ENGASEEEAEIHEIEFLIQETWEAMN-TAQSKNSPLSET  
TPS7 453 HAFIFLTNPIITQALESLNN--YPDIIIRRCALINRFVDDLGTSSDELKRGDVPKSIQCYMN-DTGASEEEAREHINLLIREMWEVMNKDQISKQVLFSEE  
TPS4 451 HAFIFLVDPIITKEALESLTN--YPDIIIRCSAIIIRLNDLGTSSDELKRGDVPKSIQCYMN-ENGASEEEAREHIFRLIKETWRKFMNTAHHKEKSLFCET  
TPS3 464 NAFFLVTNPIITKEVLEYLFSNKYPDIIIRWPAIIIRLTDLLATSSNEMKRGDVPKSIQCYMK-ENGASEEEARKHINLMIKETWRKMINTAQHND-SLFCEK  
TPS8 434 HAYFIVANFVNKEALHYLEN-NYHDIIRCSAIIIRLANDLGTSSDELKRGDVPKSIQCYMN-ETQASEEEARQYIRLLISQETWRKLNENAHWLAADPFPKI  
TPS38 407 HAYFCITNPIITKEDELQRIN--HYPAITVSPSIIIRLANDLATSPEDETKKGDYLYKSIQCYMH-DSKSCSEENARNYIKKLIETWKKMNR-DILRDESLSKD  
TPS37 427 HLFYILGLGVS---SMHLQD--ISLMSTSIKIIIRLWDDLGSARDENQEGKDGSYWEYMKENKSSMELAREHYIKLIEDEWRQLNKEHFCLMSQSTRS  
TPS39 428 HMFYILGFGLNQNSIYLED--SSAMASSVAIIIRLWDDLGSARDENQEGNDGSYIECYMKGQKNASIELAREHYVVKLIEDEWRQLNKKHFNLNMGSLGS

TPS25 506 IMKHVINBARMAHVMYLSGDGFGVQDGETQDQVILINLVQSI I-----  
TPS47 521 IAKHVINTARMGHVMYQFGDGFVQDGKTRDQILINLMEPI T-----  
TPS27 511 LTKYIMNLARVTHFTYQNGDGFVQDRETRQQLSSLVQSIPI N-----  
TPS5 567 FIEVAKNITKASHFMYLHSD-----VKSSIISKILFEPIIISNVAFALK-----  
TPS7 550 FIKIVFNFSRTSHCVYQHGDGHGQNSHITNRIISKILFEPII T-----  
TPS4 548 FVEIAKNITATTACHMYLKGDSHGQNTDVKNSISNLLFHPIT I-----  
TPS3 562 FMGCANLARTGQTYQHGDGHGQNYKIQRNRIISKILFEPII T SMP-----  
TPS8 532 FVTCAMNLARMAQCMYQHGDGHGQNSTTKNHIMALLFESVPIGHKHSAAEKEDHSMVNYREKFMI  
TPS38 503 FRRITSMNLARIAQCMYQHGDGFGIIPDRETKDRILSLFFQPIPI T-----  
TPS37 522 FSKASLNSARVSLMYSYDDKQSLPILQEYIKSMVDGNL-----  
TPS39 526 YSKASLNLARMVPLMYNYDDKQSLHVLQEYINTVLYDV-----

**Fig. S14** Sequence alignment of the proteins encoded by the functional tomato TPS-e/f genes. Black shading indicates identical amino acid residues and grey shading are the conserved or semi-conserved substitutions observed and dashes indicate gaps. The truncation sites for protein expression are indicated with triangle.

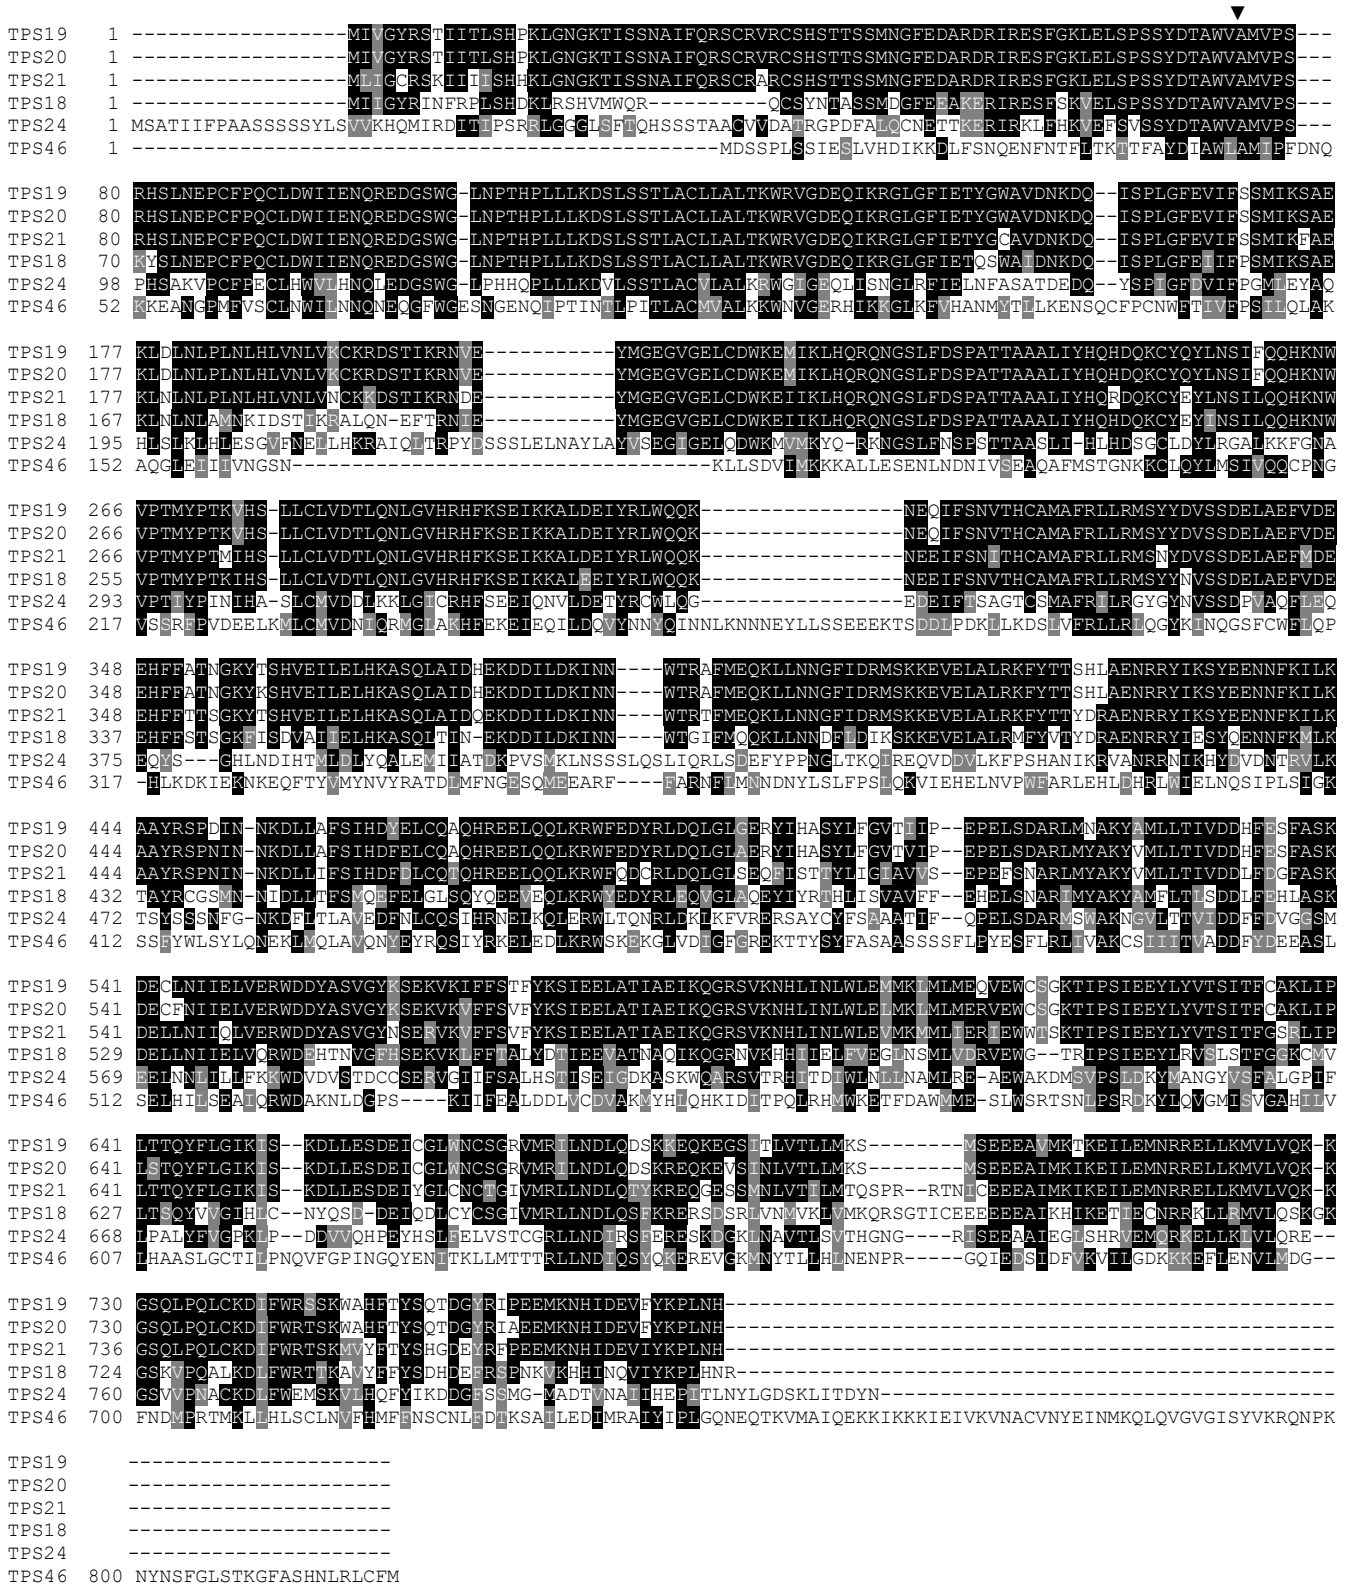

**Fig. S15 Sequence analysis of TPT homologs from tomato and other plants.** Black shading indicates identical amino acid residues and grey shading are the conserved or semi-conserved substitutions observed and dashes indicate gaps. The two aspartate-rich motifs (FARM, first aspartate-rich motif; SARM, second aspartate-rich motif) are underlined, the black arrow indicates the site of truncation of the N-termini for protein expression in this study. AtGGPPS11, geranylgeranyl diphosphate synthase 11 from *Arabidopsis thaliana* (At4g36810); AtGFPPS1, geranylgeranyl diphosphate synthase 1 (At1g49530); OsGGPPS1, geranylgeranyl diphosphate synthase 1 from *Oryza sativa* (Os07g39270); OsGPPS, geranyl diphosphate synthase (Os01g14630); AtSSU, small subunit of geranyl(geranyl) diphosphate synthase (At4g38460); OsGRP, GGPPS recruiting protein (Os02g44780); AmSSU, small subunit of geranyl diphosphate synthase from *Antirrhinum majus* (AAS82859).

```

Solyc07g061990/SPPS 1 -----MMSVTCNLEIGRTPLESLACGCSFSKGV-VLRNVRSRFSGKLLSQRQEFGRISTKASLTGLAVLDLNKSEKPISLTNVFEVADD
Solyc08g023470/DPPS 1 -----MIFSKGLAQISRNRFSRCLWFLSLRIPQLHQSNHIDHPKVLGCRVHISWVSN--ALSGIGQOIHQQSTAVAEQVPPFLWADE
Solyc02g085700/GGPPS3 1 -----MSLSTITITWGYTHHPFSDVGNKGRSR---FRSPGFMPHLKMKFTTNPSSLVSVALTLTKQES---KSKKQAMFFKELYLE
AtGGPPS11 1 -----MASVTGLGSWVIVHHHHHPHSILTKSRSRSCPITLTKPIFRSKRTVSSSSSIVSSSVTKEDNLR---QSEPSSEFMVYIIT
AtGFPPS1 1 -----MATTVHLSSSLFQSRGRDRNSISSVKSRLKRTVLSLSSALTQDAGHIQPEGKS---NDNNSAFPDKLYLIRK
Solyc02g085710/TPT1 1 -----MSMLKRVINYLVKLSRGTTPNRSRSAAGTKLLLSSEETAEVIFRPKARAFCSNSTDLSKNESEVKNHEDILGEAGKTT-SVPLFKSYVLO
Solyc02g085720/TPT2 1 -----MSMRKGVIHNLARLSTRGTPKRFRSAGTKLLLSSEETAEVIFRPKARAFCSNSTDLSKNESEVKNHEDILGEAGKTT-SVPLFKSYVLO
Solyc04g079960/GGPPS2 1 -----MRSMNLDVSWGQACLVINQSLPYNSFNLGKINSKNRKILQQSLSYRTFSSVTVSAIATNEKVVMEKEEFNFKVVYAE
OsGGPPS1 1 -----MAAFPPLAASRVRIISPLIPAAAMAGTAGAAAASYAQRHRRRFAIVATAAASVPVAAAAAATGFNFVAYGE
Solyc11g011240/GGPPS1 1 -----MAFLATISGLDNLFNTNPNNFASRKLPPSQSYFLHKKIHASDVANSFQTFQVKERDVSKAKEFILLPEFQEVYVT
OsGPPS 1 -----MHVLAQSTAVAKVAASGLRRSPNPVSVTFQRSPSLLSFAACRRRCRRGCSVSVDVRCVSLGAMTEPLNGDVGVCVGGSGPFQRYVSA
Solyc09g008920/SSU II 1 -----MVFMSVMFSPSCLPRSRMVMQKAIQCSSSVSTASESVKFLKLYWTTL
AtSSU 1 -----MLFSGSAIFLSSFCSLPEKPHLTPMKISPAAIRSSSSSAPGSLNPLRLRYWTTL
OsGRP 1 -----MALSSFSMSLPPFAKLPSTKSTRFLPIRASSAAAAASPFLRLRYWTTL
Solyc07g064660/SSU I 1 -----MARILYFSSINGSSLSFYRPIEAKMGQNOEYWASI
AmSSU 1 -----MAHGLTHFNKSLGFLPSITKSKTRPSTRFVILAMTRTOYRATI
Solyc12g015860/FPFS1 1 -----MADLKKKFLDVYSVLKSDLLEDTAFFETDSDSRKWVDKMLDYNVPGKLNRLGSLVLSLGLKDG

```

```

Solyc07g061990/SPPS 87 LLTINKNHNHNGAENF--VMSRAEQIFPG---GKVRPFAVFLVSRATHEMSG-----LKELTNHRRAEIEHMIHTASLHDDLDLSDSTR----
Solyc08g023470/DPPS 85 LSLITNIRSRMVAEVP--KASRAEYFFKIGVE---GKRFRPTVLLMATAINVQIPSPASQVDVDSFSGDLRTRQCCIAEITEMIHVASLHDDLDLSDADTR----
Solyc02g085700/GGPPS3 77 AVSNKRALDSAMSEKRP-VMHEISMRYSLLAG---KRIRPVLCAACELVGGVES-----TAMPAACAVEMIHHTMSLHDDLPCMDND----
AtGGPPS11 84 AEIVNKRALDSAMSEKRP-LKHEAMRYSLLAG---KRVRPVLCAACELVGGVES-----TAMPAACAVEMIHHTMSLHDDLPCMDND----
AtGFPPS1 74 AESVNRALDSAMSEKRP-LTQHEAMRYSLLAG---KRVRPVLCAACELVGGDEA-----TAMPAACAVEMIHHTMSLHDDLPCMDND----
Solyc02g085710/TPT1 89 IKSNNALDRAMPSEPK-IKFHEAMRYSLLEG---KRRCVPLCAACELVGGQES-----TAMPAACAVEMIHHTMSLHDDLPCMDND----
Solyc02g085720/TPT2 90 VKSVNALDRAMPSEPK-IKFHEAMRYSLLEG---KRRCVPLCAACELVGGQES-----TAMPAACAVEMIHHTMSLHDDLPCMDND----
Solyc04g079960/GGPPS2 80 AICVNRALDSAMSEKRP-PKHHEAMRYSLLAG---KRVRPVLCAACELVGGQNG---NAMPAAACAVEMIHHTMSLHDDLPCMDND----
OsGGPPS1 74 AAANVNRALDSAMSEKRP-PAAHEAMRYSLLAG---KRVRPVLCAACELVGGREA-----WAMPAAACAVEMIHHTMSLHDDLPCMDND----
AtGFPPS1 83 AIKVNKRALDSAMSEKRP-IKVHEAMRYSLLAG---KRVRPVLCAACELVGGDES-----LAPAAACAVEMIHHTMSLHDDLPCMDND----
OsGPPS 92 ADANVNRALDRAMPSEPK-ERKCEAMRYSLLAG---KRVRPVLCAACELVGGDAA-----AAPAAACAVEMIHHTMSLHDDLPCMDND----
Solyc09g008920/SSU II 51 ISDINOKLDRAMPSEPK-NQIYEAMRYSLAG---AKRSPVPLCAACELVGGNRL-----AAPAAACAVEMIHHTMSLHDDLPCMDND----
AtSSU 55 ITEINOKLDRAMPSEPK-AGIYEAMRYSLLAG---AKRSPVPLCAACELVGGDRL-----AAPAAACAVEMIHHTMSLHDDLPCMDND----
OsGRP 50 IADVEALDRAMPSEPK-ERHSAMRYSLLAG---GNEGTAAPVPLCAACELVGGPRE-----AAPAAACAVEMIHHTMSLHDDLPCMDND----
Solyc07g064660/SSU I 36 ESDIEAHLKKAISERAP-ESVFEPMHLLTFTTP---KSTAPVPLCAACELVGGDRD-----RAMPAASAHIMHVAVNYTHQHMTARTPGPVIE
AmSSU 46 ESDIEAHLKKAISERAP-ESVFEPMHLLTFTTP---KSTAPVPLCAACELVGGDRS-----DAMPAAAVHIMHVAVNYTHQHMTARTPGPVIE
Solyc12g015860/FPFS1 65 KELTADIEKASALGWC---EELWQAEVFLVDD---IMPGSHTRRGGQFVWYLNLEKVG-----MIAINDGILLRNIITRIKKYFRPESYVV----

```

```

Solyc07g061990/SPPS 173 -----RGEIHLQVYCTRVAVLAGEFLFAQSSWYLANLEN-----LEWHLISQIIDFSSGEIKQSNPDCDVG-----LEY
Solyc08g023470/DPPS 184 -----RGTGLNFMGNKRLAVLAGDELRSKCVADASLKN-----TEVYCLEATVVEHIVGETQMOTSSDDEKCS-----EY
Solyc02g085700/GGPPS3 158 -----LRRGKPNHKTIVGEDAVLAGDALSLAFEFHIAATKSG-----VSSDRIVVITGELANCTGACGLVAGQVVDISEG-----ISDVTDKH
AtGGPPS11 165 -----LRRGKPNHKTIVGEDAVLAGDALSLAFEFHIAATKSG-----VVSFVVRVRAVGLANAGCTGGLVAGQVVDISEGGLDLDNVGLBHL
AtGFPPS1 155 -----LRRGKPNHKTIVGEDAVLAGDALSLAFEFHIAATKSG-----LVAPKMIARAVGLARAGCTGGLVAGQVVDISEGGLDLDNVGLBHL
Solyc02g085710/TPT1 170 -----LRRGKPNHKTIVGEDAVLAGDALSLAFEFHIAATKSG-----VHFPTMVARAVGLARLGGPGAAAGQVVDLCCG--NSDITGLEEL
Solyc02g085720/TPT2 171 -----LRRGKPNHKTIVGEDAVLAGDALSLAFEFHIAATKSG-----VHFPTMVARAVGLARLGGPGAAAGQVVDLCCG--NSDITGLEEL
Solyc04g079960/GGPPS2 161 -----LRRGKPNHKTIVGEDAVLAGDALSLAFEFHIAATKSG-----VSPSRILVAVARLARSVGGGLVAGQVVDLCCG--KFNVTGLEML
OsGGPPS1 156 -----LRRGKPNHKTIVGEDAVLAGDALSLAFEFHIAATKSG-----VPPQRVVCAIGELSSAGSGLVAGQVVDLCCG--KQVSLTELE
Solyc11g011240/GGPPS1 164 -----LRRGKPNHKTIVGEDAVLAGDALSLAFEFHIAATKSG-----VPPQRVVCAIGELSSAGSGLVAGQVVDLCCG--KQVSLTELE
OsGPPS 173 -----LRRGKPNHKTIVGEDAVLAGDALSLAFEFHIAATKSG-----VPPQRVVCAIGELSSAGSGLVAGQVVDLCCG--KQVSLTELE
Solyc09g008920/SSU II 133 -----TRRGKPNHKTIVGEDAVLAGDALSLAFEFHIAATKSG-----SDIVPEDRVLRVITETARAVGSGAGAACQFIDIE-----GGPNAV
AtSSU 137 -----LRRGKPNHKTIVGEDAVLAGDALSLAFEFHIAATKSG-----PDLVPRATLRLITEARAVGSGAGAACQVVDIE-----GGPFPL
OsGRP 137 -----TRRGKPNHKTIVGEDAVLAGDALSLAFEFHIAATKSG-----PDLVPRATLRLITEARAVGSGAGAACQFIDIE-----GGPFPL
Solyc07g064660/SSU I 122 HKFGPDGILVESQAKGLGPARNIRIDIEEPEKKGPNIEHLGDSHPPFELVVKAMSPAR-----KNSDKINSVTHETRAEVSSGQEGCYRELEWAQ--SGNDEETF
AmSSU 125 -----PMSISEIQKEDPNIEHLGDSHPPFELVVKAMSPAR-----NNPDRILHRAHIELETRAEVSSGQEGCYRELEWAQ--SGNDEETF
Solyc12g015860/FPFS1 145 -----DLDDLNFVGFQTAGSQMIDPDTTVGKDLRKYK-----LSLRRRIVQIKTAYSYFLVFCALVGVGEN-----LTKH

```

FARM

Solyc07g061990/SPPS 243 LLKSYKTAASLAASTKGAIFSEVGSISEQMFQYGRNLGLSFOVDDILDITCSAAQLGKFAAGSDLAKGNLAFVVFALKEPNLRNIESEFHDAGSLEEAINLVKS  
 Solyc08g023470/DPPS 254 MQKTYKTAASLANSCKAIALLAGHSARVSVLAFYGRNLGLAFQLDDLDITCSATLGRGSLSDIRHGIVTAFILYAMBEFPQLRTLVDGRGFDVNVVEIALDYLK  
 Solyc02g085700/GGPPS3 239 EPIHSHKTAALLESVVIIGAILGGAPDEDVEKLRKFRARCGLLFQVDDILDITKSSQQLGKTACKDILVADKVTYPKLIGLE-----  
 AtGGPPS1 250 EPIHSHKTAALLESVVIIGAILGGAPDEDVEKLRKFRARCGLLFQVDDILDITKSSQQLGKTACKDILVADKVTYPKLIGLE-----  
 AtGFPPS1 239 EPIHSHKTAALLESVVIIGAILGGAPDEDVEKLRKFRARCGLLFQVDDILDITKSSQQLGKTACKDILVADKVTYPKLIGLE-----  
 Solyc02g085710/TPT1 251 EPIHSHKTAALLESVVIIGAILGGAPDEDVEKLRKFRARCGLLFQVDDILDITKSSQQLGKTACKDILVADKVTYPKLIGLE-----  
 Solyc02g085720/TPT2 252 EPIHSHKTAALLESVVIIGAILGGAPDEDVEKLRKFRARCGLLFQVDDILDITKSSQQLGKTACKDILVADKVTYPKLIGLE-----  
 Solyc04g079960/GGPPS2 242 EPIHSHKTAALLESVVIIGAILGGAPDEDVEKLRKFRARCGLLFQVDDILDITKSSQQLGKTACKDILVADKVTYPKLIGLE-----  
 OsGGPPS1 245 EPIHSHKTAALLESVVIIGAILGGAPDEDVEKLRKFRARCGLLFQVDDILDITKSSQQLGKTACKDILVADKVTYPKLIGLE-----  
 Solyc11g011240/GGPPS1 244 EPIHSHKTAALLESVVIIGAILGGAPDEDVEKLRKFRARCGLLFQVDDILDITKSSQQLGKTACKDILVADKVTYPKLIGLE-----  
 OsGPPS 255 EPIHSHKTAALLESVVIIGAILGGAPDEDVEKLRKFRARCGLLFQVDDILDITKSSQQLGKTACKDILVADKVTYPKLIGLE-----  
 Solyc09g008920/SSU II 210 DFVQEKRFEMGFCSAVCGALLGGSDEEIQHMRYGRAGVGLYQVDDILDITKSSQQLGKTACKDILVADKVTYPKLIGLE-----  
 AtSSU 214 SFVQEKRFEMGFCSAVCGALLGGSDEEIQHMRYGRAGVGLYQVDDILDITKSSQQLGKTACKDILVADKVTYPKLIGLE-----  
 OsGRP 219 MKVLTKRFEMGFCSAVCGALLGGSDEEIQHMRYGRAGVGLYQVDDILDITKSSQQLGKTACKDILVADKVTYPKLIGLE-----  
 Solyc07g064660/SSU I 225 EYVCKKRESETHACCAACGAILGGCDEDEKELRRFGLYGTQCGDING-----GRNYNK-----  
 AmSSU 205 EYVCKKRESETHACCAACGAILGGCDEDEKELRRFGLYGTQCGDING-----GRNYNK-----  
 Solyc12g015860/FPSP1 215 VDKKILDMGKLYFQVDDYLDLDFDPEVIEKIGTIDQFKCSHLYKALTELCNEEQKLLFENYKDNAAICAKIKALYND-----

SARM

Solyc07g061990/SPPS 353 CGGIQRAQDLAREKADLQMQLKCLPSSP-----FOALAEIVRYNLERIE-----  
 Solyc08g023470/DPPS 364 SRGIQRTEDARKHASTLSAANDSLPESDDEEVQSRRAVEITHRWITRTK-----  
 Solyc02g085700/GGPPS3 321 ----KSEFAEELNKBAQALVGFQEKI-----APLFAIANYLAYREN-----  
 AtGGPPS1 332 ----KSEFAEELNKBAQALVGFQEKI-----APLFAIANYLAYREN-----  
 AtGFPPS1 321 ----GSEVFAEKLRREBEQLLGFDPSEK-----APLFAIANYLAYREN-----  
 Solyc02g085710/TPT1 353 ----KSEFAEQKLNKBAEQLVGFDPSEK-----APLFAIANYLAYREN-----  
 Solyc02g085720/TPT2 334 ----KSEFAEQKLNKBAEQLVGFDPSEK-----APLFAIANYLAYREN-----  
 Solyc04g079960/GGPPS2 324 ----KSEFAEELNGBAQQLAALFDSHK-----APLFAIANYLAYREN-----  
 OsGGPPS1 327 ----KSEFAEELLSDAEQLSGFQETH-----APLFAIANYLAYREN-----  
 Solyc11g011240/GGPPS1 326 ----KARQVAGELMARQMNESYFDYAK-----APLFAIANYLAYREN-----  
 OsGPPS 337 ----KARQVAGELMARQMNESYFDYAK-----APLFAIANYLAYREN-----  
 Solyc09g008920/SSU II 287 ----KAVVADDLRAQAKRELDELKYG----DKVMPYSFVLYAADRGFSDGQV---  
 AtSSU 279 ----MNEVAPLKEKAKKELQVFNKYGG--DTLVMPYSFVLYAADRGFSLPLPL-  
 OsGRP 291 ----EALGVBELKAQAKMEADRQCDKYE---ERVLPYSFVLYAADRGFELQDAATTP  
 Solyc07g064660/SSU I 279 ----KMEKRVNDRILAMKELNTSFKGRK-----LKKQASLMEES-----  
 AmSSU 257 ----GFEGRIKELKELAVKELESKGGKTI-----ELTRGVFEHSLAGV-----  
 Solyc12g015860/FPSP1 297 ----IKLEEVFTEYEKTSYEKHTTSIAAHP--SKAVQVLLSFLGKLYKQK-----

**Fig. S16 GC-MS analysis of terpenes extracted from tomato leaves.** No significant differences between terpenes were observed from three extraction methods, data present in Fig. 10 was obtained by using MTBE dipping method as described in Methods S1. Terpene signals are identified by comparison of their mass spectra and retention indices with authentic standards and NIST libraries. Monoterpenes and sesquiterpenes are indicated with red and blue dotted lines, respectively. Non-terpene compounds are indicated with asterisks. Terpenes identified from left to right are as follows:  $\alpha$ -thujene,  $\alpha$ -pinene, unknown 5, 1,3,5-cycloheptatriene, 3,7,7-trimethyl-,  $\beta$ -pinene, isolimonene,  $\beta$ -myrcene, (+)-2-carene,  $\alpha$ -phellandrene,  $\alpha$ -terpinene, m-cymene,  $\beta$ -phellandrene,  $\beta$ -ocimene,  $\alpha$ -ocimene,  $\gamma$ -terpinene, terpinolene, unknown 6, *trans*-p-mentha-2,8-dienol,  $\alpha$ -terpineol, nerol, geraniol,  $\delta$ -elemene (germacrene C),  $\beta$ -elemene (germacrene A),  $\beta$ -caryophyllene,  $\alpha$ -humulene, germacrene D, cis-muurolo-3,5-diene,  $\alpha$ -farnesene, E-nerolidol. Mass spectra and retention indices of the terpene compounds can be found in Fig. S3 and Table S2, respectively.

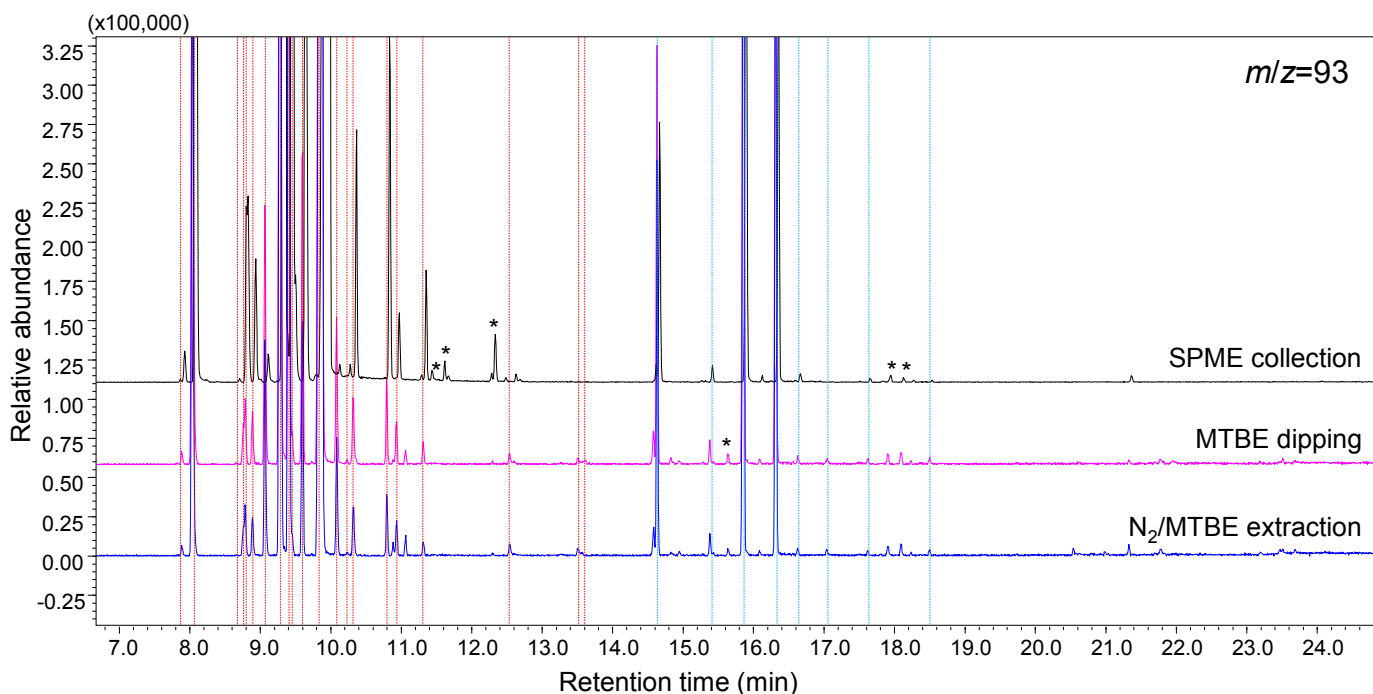

**Fig. S17 Correlation analysis of terpene biosynthesis genes and volatile terpenes from tomato.** The Spearman correlation coefficients were calculated using gene expression data and terpene profiling data as indicated in Fig. 9 and Fig. 10, respectively. Genes characterized in this work are shown in bold. The hierarchical clustering was performed using average linkage method by Cluster 3.0.

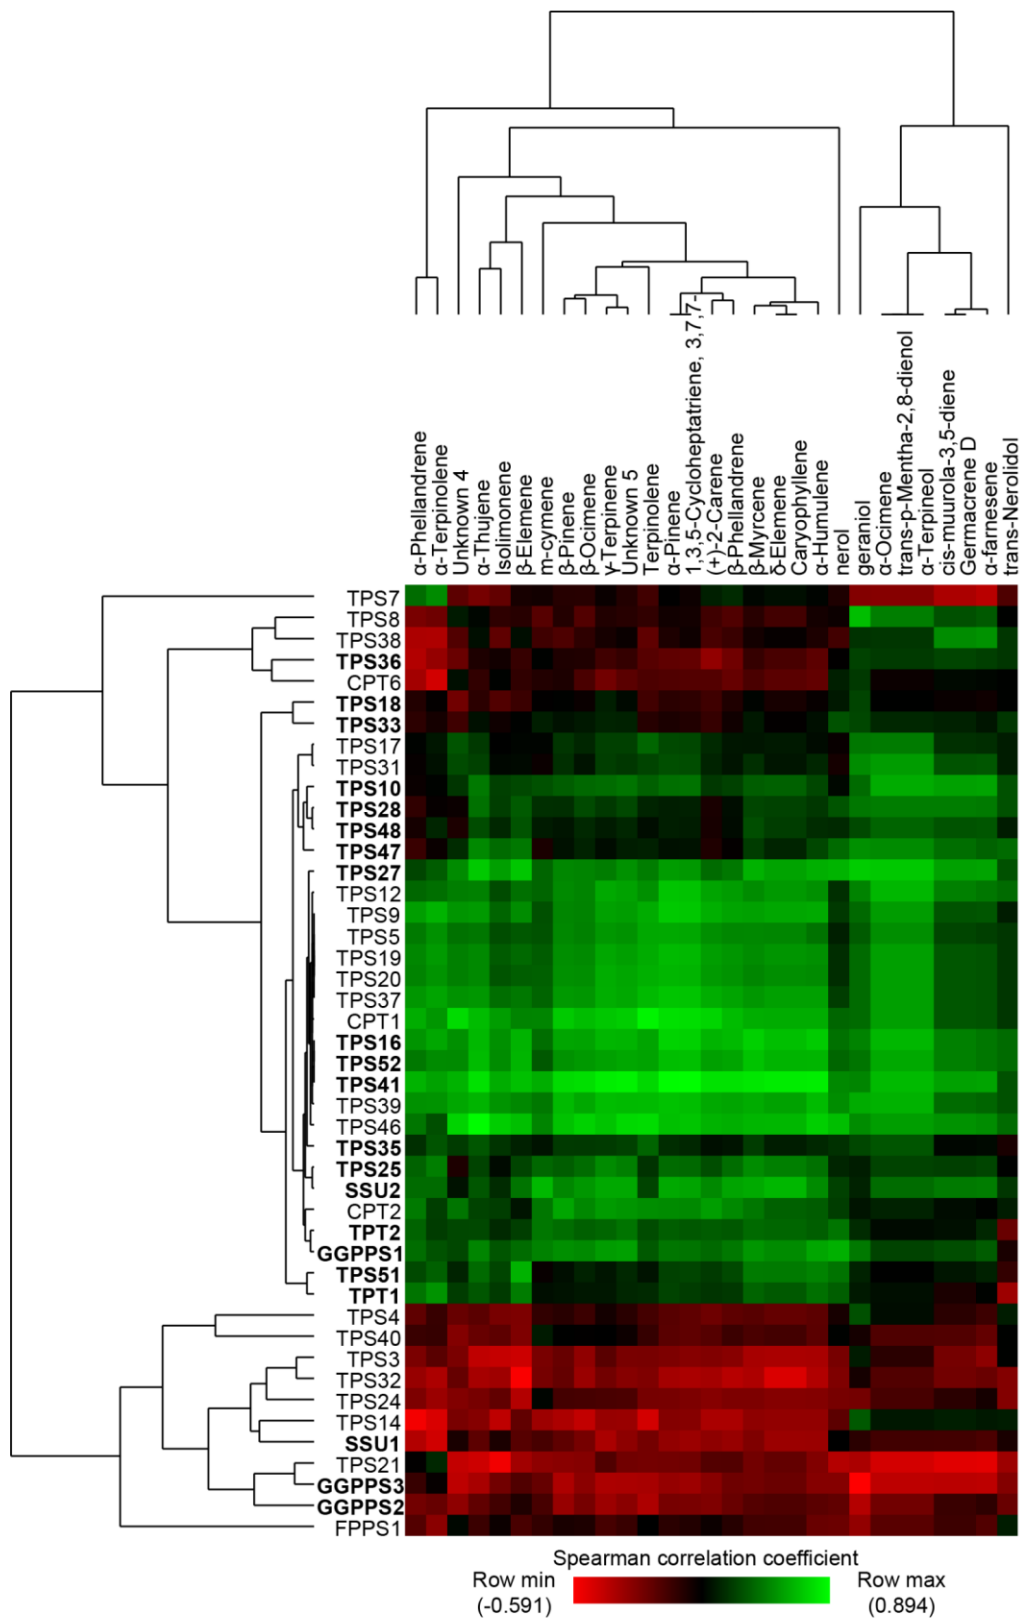

**Fig. S18 Terpene biosynthesis gene clusters identified from tomato genome by plantiSMASH.** The functional TPS genes are shown in bold. The eight clusters (7, 10, 17, 18, 26, 36, 42 and 43; numbered in the analysis of plant secondary metabolite clusters for *Solanum lycopersicum*) are obtained from plantiSMASH website ([http://plantismash.secondarymetabolites.org/precalc/precalc/Solanum\\_lycopersicum/](http://plantismash.secondarymetabolites.org/precalc/precalc/Solanum_lycopersicum/)).

SL2.50ch01 - Gene Cluster 7. Type = terpene. Location: 93839435 - 93979803 nt. [Click on genes for more information.](#)  
[Show pHMM detection rules used](#)

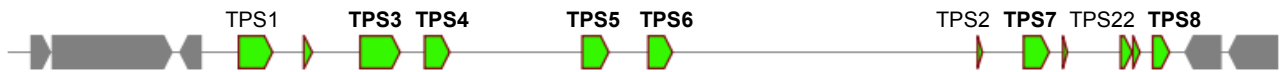

SL2.50ch02 - Gene Cluster 36. Type = terpene. Location: 44246088 - 44308948 nt. [Click on genes for more information.](#)  
[Show pHMM detection rules used](#)

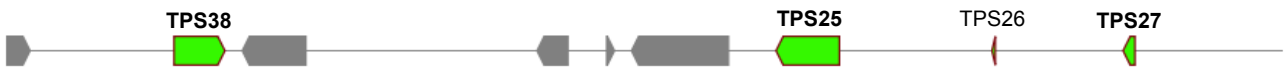

SL2.50ch06 - Gene Cluster 42. Type = terpene. Location: 37803946 - 38001175 nt. [Click on genes for more information.](#)  
[Show pHMM detection rules used](#)

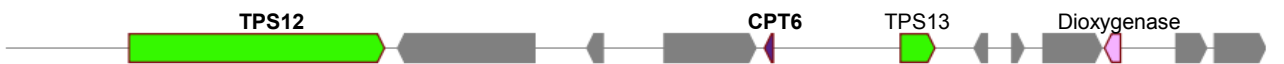

SL2.50ch06 - Gene Cluster 43. Type = terpene. Location: 38130615 - 38191506 nt. [Click on genes for more information.](#)  
[Show pHMM detection rules used](#)

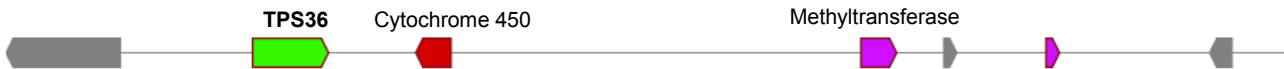

SL2.50ch07 - Gene Cluster 17. Type = lignan-terpene. Location: 60595725 - 60709207 nt. [Click on genes for more information.](#)  
[Show pHMM detection rules used](#)

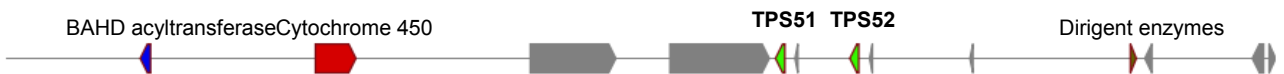

SL2.50ch08 - Gene Cluster 26. Type = terpene. Location: 464459 - 617526 nt. [Click on genes for more information.](#)  
[Show pHMM detection rules used](#)

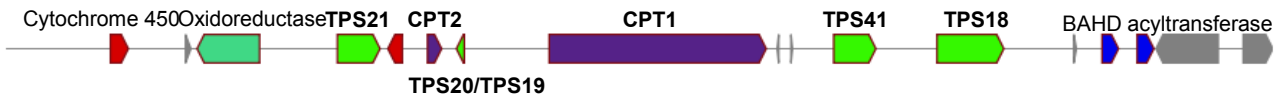

SL2.50ch09 - Gene Cluster 10. Type = saccharide-terpene. Location: 71529135 - 71576652 nt. [Click on genes for more information.](#)  
[Show pHMM detection rules used](#)

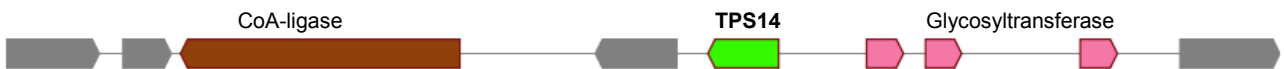

SL2.50ch12 - Gene Cluster 18. Type = saccharide-terpene. Location: 836959 - 1084067 nt. [Click on genes for more information.](#)  
[Show pHMM detection rules used](#)

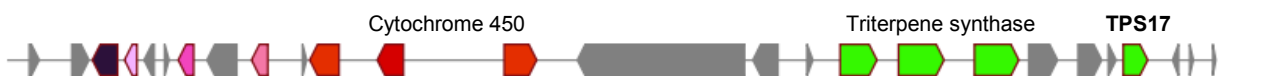

**Legend:**

|                    |                         |                     |                            |             |
|--------------------|-------------------------|---------------------|----------------------------|-------------|
| Cytochrome 450     | Terpene synthase        | Glycosyltransferase | BAHD acyltransferase       | Epimerase   |
| Dioxygenase        | Amino oxidase           | Aminotransferase    | (Other) Biosynthetic Genes | Other Genes |
| biosynthetic genes | transport-related genes | regulatory genes    | other genes                |             |

**Table S1** Primers used in this work.

| Primer name <sup>1</sup>                                                 | Sequence (5'-3') <sup>2</sup>            |
|--------------------------------------------------------------------------|------------------------------------------|
| <i>For cloning of genomic DNA and sequencing</i>                         |                                          |
| TPS47-F                                                                  | CACACTTGATGTACCTTCCAATGTAC               |
| TPS47-R                                                                  | TTATGTAATAGGCTCCATCAAGTTGATTAGG          |
| TPS48-F                                                                  | GTATTATCACAATATAGCAACAATGAC              |
| TPS48-R                                                                  | TTACAGCTTGATGGAGTTGACGAGTAAAGC           |
| TPS49-F                                                                  | ATGGAATACTTAAACAAATATCC                  |
| TPS49-R                                                                  | TAATTGAGACAATATGCATTGAG                  |
| TPS50-F                                                                  | ATGGAGATTAACAATATGAATGTTC                |
| TPS50-R                                                                  | GTCACATTCATACATAAATACATAATG              |
| TPS51-F                                                                  | TGTTGGTTCCTTTCTTTCACC                    |
| TPS51-R                                                                  | TTCATCATTGAGTAATAATTCTTTG                |
| TPS52-F                                                                  | ATGGTCGTTGGATTTGGTGGTGAAGC               |
| TPS52-R                                                                  | CAAGCTTTTAATCTTGACTATATTTTC              |
| TPS53-F                                                                  | CTACTTGGGTTCAATTCTAAGTAATTATTACAC        |
| TPS53-R                                                                  | CTCAAACCTTAATCATTACTCTACCTC              |
| <i>For cloning in pET32b and creating His-tagged recombinant protein</i> |                                          |
| TPS10-opti-NdeIF                                                         | GCTAATCCATATGCGATCCTCCAGTAGTACG          |
| TPS10-opti-XhoIR-                                                        | CCGCTCGAGACTGATGGAAATTTTACGCTC           |
| TPS16-opti-NdeIF                                                         | GCTAATCCATATGCGCCGCGTGGGGTCCCACCAC       |
| TPS16-opti-XhoIR-                                                        | CCGCTCGAGGATAATTGGGTCGATAAGGATACG        |
| TPS25-NdeIF                                                              | GCTAATCCATATGGAAAGGATTTCTACCTATAAACCAAAC |
| TPS25-NotIR-                                                             | TTCACGCGGCCGCTATAATAGACTGTACCAAGTTTATAAG |
| TPS27-NdeIF                                                              | GCTAATCCATATGCGACGAAATGCTAATTACAAGCC     |
| TPS27-XhoIR-                                                             | CCGCTCGAGATTGAGAGGAAGTGATTGAACC          |
| TPS47-opti-NdeIF                                                         | GCTAATCCATATGACTACGATTTTCATCCTATAAGCCC   |
| TPS47-opti-XhoIR-                                                        | CCGCTCGAGAGTAATTGGCTCCATAAGATTAATTAATC   |
| TPS51-opti-NdeIF                                                         | GCTAATCCATATGGACGGCTTCGGGGATGAGG         |
| TPS51-opti-XhoIR-                                                        | CCGCTCGAGGGTTGTGATAGGATCGATTAAG          |
| TPS52-opti-NdeIF                                                         | GCTAATCCATATGGTGGTAGGATTTGGCGGCG         |
| TPS52-opti-XhoIR-                                                        | CCGCTCGAGTGCCTTGATCGGGTCGATAAGTACC       |
| dGGPPS1-NdeIF                                                            | GCTAATCCATATGCCTGAGTTTGTGATTTCAAGAATAC   |
| GGPPS1-XhoIR-                                                            | CCGCTCGAGATTCTGTGATTTGCAATATAAC          |
| dGGPPS2-NdeIF                                                            | GCTAATCCATATGGAAAAAGAAGATTTAATTTTC       |
| GGPPS2-XhoIR-                                                            | CCGCTCGAGATTTTGACGATTAGCAATGTAATC        |
| dGGPPS3-NdeIF                                                            | GCTAATCCATATGGAGTTTAAAGAATACGTTCTTG      |
| GGPPS3-XhoIR-                                                            | CCGCTCGAGATTCTCTCTGTAAGCAATATAATTTGC     |
| dTPT1-XbaIF                                                              | GCTCTAGATGAGTGTCTTTGATTTCAAAGTTAC        |
| TPT1-EcoRIR-                                                             | CGGAATTCATTTTTGCCGATGAAGAACG             |



|                                                                                       |                                             |
|---------------------------------------------------------------------------------------|---------------------------------------------|
| dTPT2-XbaIF                                                                           | GCTCTAGATGAGTGTCTTTGATTTGAAAAGTTAC          |
| TPT2-EcoRIR-                                                                          | CGGAATTCATTTTTGCCGATGAAGAAG                 |
| <i>To create non-tagged protein in pET32b and co-express with pET28a-SSU I/SSU II</i> |                                             |
| GGPPS1-XhoIR+<br>(with dGGPPS1-NdeIF)                                                 | CCGCTCGAGTCAATTCTGTGCGATTTGCAATATAAC        |
| GGPPS2-XhoIR+<br>(with dGGPPS2-NdeIF)                                                 | CCGCTCGAGTTAATTTTGACGATTAGCAATGTAATC        |
| GGPPS3-XhoIR+<br>(with dGGPPS3-NdeIF)                                                 | CCGCTCGAGTTAATTCTCTCTGTAAGCAATATAAATTGC     |
| <i>For cloning in pET28a and creating His-tagged recombinant protein</i>              |                                             |
| TPS28-NcoIF                                                                           | CATGCCATGGTTCGCCAGAGGCTAATTTCTCTC           |
| TPS28-XhoIR-                                                                          | CCGCTCGAGCATATTGATAGGATTCACGAGTAAAG         |
| TPS33-NcoIF                                                                           | CATGCCATGGTTCGCCCTGTTGCTGATTTCTCTCC         |
| TPS33-XhoIR-                                                                          | CCGCTCGAGAATCTCAACAGAATCTACCAACAAGGC        |
| TPS35-NcoIF                                                                           | CATGCCATGGGCCCTGTTGCTGACTTCTCTCC            |
| TPS35-XhoIR-                                                                          | CCGCTCGAGAATTTCAATAGAGTCCACCAACAACGC        |
| TPS36-NheIF                                                                           | TTCACGCTAGCATGGATGTTAACTCTTACGTC            |
| TPS36-NotIR-                                                                          | TTCACGCGGCCGCTTATGATCGTCCTATAGTAAC          |
| TPS48-NcoIF                                                                           | CATGCCATGGACCGTCTAGAGGCTAATTTTCTCCTAG       |
| TPS48-XhoIR-                                                                          | CCGCTCGAGCAGCTTGATGGAGTTGACGAGTAAAG         |
| dSSUI-NdeIF                                                                           | GCTAATCCATATGGGCCAAAATCAATCTTATTG           |
| SSUI-EcoRIR-                                                                          | CGGAATTCAGACTCTTCAACAAGACTAGC               |
| dSSUII-NdeIF                                                                          | GCTAATCCATATGACAGCATCTGAGTCCGTCAAG          |
| SSUII-EcoRIR-                                                                         | CGGAATTCGACTTGCCATCAATGCTAAAAC              |
| <i>For cloning in pEZS-NL and subcellular localization analysis</i>                   |                                             |
| TPS3-XhoIF                                                                            | CCGCTCGAGATGTCAATATTCTCCACAAGATATTTAG       |
| TPS3-BamHIR-                                                                          | CGGGATCCCGACGCCTAATAGGATTAATTATTCATTG       |
| TPS4-EcoRIF                                                                           | CGGAATTCATGAAGGCAATATTATTGAACAACATAGG       |
| TPS4-BamHIR-                                                                          | CGGGATCCCGCATAGTAGGTTTGTAATTTCTGAAACG       |
| TPS5-XhoIF                                                                            | CCGCTCGAGATGGTTTCAATATTGAGTAACATAGGG        |
| TPS5-BamHIR-                                                                          | CGGGATCCCGAGGCTTGTAATTCCTGAACGCCTTG         |
| TPS7-EcoRIF                                                                           | CGGAATTCATGGTTTCAATATTCAGTAACGCAGGG         |
| TPS7-BamHIR-                                                                          | CGGGATCCCGAGGCTTGTAATTCCTCGAACGCCTTG        |
| TPS8-XhoIF                                                                            | CCGCTCGAGATGTATAAACTGGAAATGACAATGTC         |
| TPS8-BamHIR-                                                                          | CGGGATCCCG TTTCTCGTCTGAATAATGATTCTTCAGTG    |
| TPS9-XhoIF                                                                            | CCGCTCGAGATGGCTGCTTCTTCTGCTGATAAGTGTC       |
| TPS9-BamHIR-                                                                          | CGGGATCCCGCAA AAA TGT TTT GAA TGG ATG TTT C |
| TPS10-EcoRIF                                                                          | CGGAATTCATGGCTTCTTCTTCTTCTACTAATAAG         |
| TPS10-BamHIR-                                                                         | CGGGATCCCGCGCGTCGATCAACACAAGCTTTTG          |
| TPS12-XhoIF                                                                           | CCGCTCGAGATGGCTTCTTCTTCTGCTAATAAGTGTCG      |

|               |                                          |
|---------------|------------------------------------------|
| TPS12-BamHIR- | CGGGATCCCGCAAAAATGTTTTGAATGGATGTTTC      |
| TPS16-EcoRIF  | CGGAATTCATGGAGCTGTGCACACAAACCGTTC        |
| TPS16-BamHIR- | CGGGATCCCGGTAACCTCAATCTCATGTTCAAATG      |
| TPS17-XhoIF   | CCGCTCGAGATGGAGTTGTGCACACAAACCGTTGC      |
| TPS17-BamHIR- | CGGGATCCCGGATTCATCAATCTCACTTTGAAAATG     |
| TPS18-EcoRIF  | CGGAATTCATGATAATTGGCTATAGAATCAATTTTC     |
| TPS18-BamHIR- | CGGGATCCAAGGTAGGGTTTAGTCCCAAGATC         |
| TPS19-XhoIF   | CCGCTCGAGATGATAGTTGGCTATAGAAGCACAATC     |
| TPS19-BamHIR- | CGGGATCCCGAGAAAGTGAGTCCTTTAGAAGCAATGG    |
| TPS20-XhoIF   | CCGCTCGAGATGATAGTTGGCTATAGAAGCACAATC     |
| TPS20-BamHIR- | CGGGATCCCGAGAAAGTGAGTCCTTTAGAAGCAATGG    |
| TPS21-XhoIF   | CCGCTCGAGATGCTAATTGGCTGTAGAAGCAAAAATC    |
| TPS21-BamHIR- | CGGGATCCCGAGAAAGTGAGTCCTTTAGAAGCAATGG    |
| TPS24-XhoIF   | CCGCTCGAGATGTCTGCTACCATTATTTTCTG         |
| TPS24-BamHIR- | CGGGATCCCGATCTTCAAGTTGATTATGCAACACCC     |
| TPS25-EcoRIF  | CGGAATTCATGGCTTGCATAAACATGGTGTC          |
| TPS25-BamHIR- | CGGGATCCCTTTGTATCAACCTCAAAGTAAGCAC       |
| TPS27-EcoRIF  | CGGAATTCATGACAAGTGAGCAGCAATCTG           |
| TPS27-BamHIR- | CGGGATCCCGTAGAAACACCATGATTCCTTGTC        |
| TPS28-EcoRIF  | CGGAATTCATGAGTTTATTGGAAGGAAATGTAAACC     |
| TPS28-BamHIR- | CGGGATCCCGCTTGCTTAGTTGATCTTCAATCTCC      |
| TPS31-XhoIF   | CCGCTCGAGATGGCCCCAGCTGCTGCATTGATGAG      |
| TPS31-BamHIR- | CGGGATCCCGTCAACATGTGCTCTATTTGTTTTTC      |
| TPS32-XhoIF   | CCGCTCGAGATGGCCCTACTTAACAACCAAGATGAG     |
| TPS32-BamHIR- | CGGGATCCCGCCAACATGTCCTCTATTTGTTTTTC      |
| TPS33-EcoRIF  | CGGAATTCATGGCCTCAGCTGCTGCATTGATG         |
| TPS33-BamHIR- | CGGGATCCCGGTCTCTATTTGTGTCTCAAAATG        |
| TPS35-EcoRIF  | CGGAATTCATGGCCTCAGCTGCTGCATTGGTG         |
| TPS35-BamHIR- | CGGGATCCCGTTTGTAATTTGATCCAACACATCG       |
| TPS37-XhoIF   | CCGCTCGAGATGGCAAATATTACTAAAGCTTTCTCCC    |
| TPS37-BamHIR- | CGGGATCCCG GCGATTATAGCTCGTTTGAAGATAAGAGG |
| TPS38-XhoIF   | CCGCTCGAGATGCTTCAAAGTTGCATATCAACTATG     |
| TPS38-BamHIR- | CGGGATCCCGAATTCTAAAGCTGTATCATACAACCTC    |
| TPS39-XhoIF   | CCGCTCGAGATGGAAATGACTAAAGTCTTGATTCCC     |
| TPS39-BamHIR- | CGGGATCCCGGTACGTGGAGTTGCTCTGAGAAGATC     |
| TPS40-XhoIF   | CCGCTCGAGATGTCGATCTCAGCTTCTTTTTTAAG      |
| TPS40-BamHIR- | CGGGATCCCGCGATCGAATAGCATCGATATGGTC       |
| TPS41-SalIF   | ACGCGTTCGACATGCTGGTAATTACATCCAATTAC      |
| TPS41-BamHIR- | CGGGATCCAAGTGAATATCCTTTTCTTCATACTTG      |
| TPS46-XhoIF   | CCGCTCGAGATGGATTCCTCACCATTGTCTTCTATTG    |

|                                                               |                                          |
|---------------------------------------------------------------|------------------------------------------|
| TPS46-BamHIR-                                                 | CGGGATCCCGTACCATGCATGCAAGAGTAATAGGGAG    |
| TPS47-XhoIF                                                   | CCGCTCGAGATGGCTTGCAGATGCATATTATCC        |
| TPS47-BamHIR-                                                 | CGGGATCCCGTGGAGTACTCTTTGAAAACGTG         |
| TPS48-XhoIF                                                   | CCGCTCGAGATGACTTCACTGGCTGGAAATG          |
| TPS48-BamHIR-                                                 | CGGGATCCCGCGTCATCTGATTAATCCGAGTAG        |
| TPS51-XhoIF                                                   | CCGCTCGAGATGGATGGATTTGGTGATGAGGCAGAG     |
| TPS51-BamHIR-                                                 | CGGGATCCCGTTATAGATTTCACTCAATGATTCCTC     |
| TPS52-XhoIF                                                   | CCGCTCGAGATGGTCGTTGGATTTGGTGGTGAAGCGGAG  |
| TPS52-BamHIR-                                                 | CGGGATCCCGATTATAGATTTCACTCAATGATTCCTC    |
| FPPS1-XhoIF                                                   | CCGCTCGAGATGGCTGATCTGAAGAAGAAATTTTGG     |
| FPPS1-BamHIR-                                                 | CGGGATCCCGCTTCTGCCTCTTATAAATCTTTCCCAAG   |
| GGPPS1-EcoRIF                                                 | CGGAATTCATGGCATTTTTAGCTACCATTTCTGG       |
| GGPPS1-BamHIR-                                                | CGGGATCCCAATTCTGTCGATTTGCAATATAACTAG     |
| GGPPS2-XhoIF                                                  | CCGCTCGAGATGAGATCTATGAACCTTGTTGATTC      |
| GGPPS2-SalIR-                                                 | ACGCGTCGACTGATTTGACGATTAGCAATGTAATCTGC   |
| GGPPS3-EcoRIF                                                 | CGGAATTCATGAGTCTTCAACAACAATTACAAC        |
| GGPPS3-BamHIR-                                                | CGGGATCCCGATTCTCTCTGTAAGCAATATAATTTGC    |
| SSU I-EcoRIF                                                  | CGGAATTCATGGCAAGAATTTTATATTTTCTCTCC      |
| SSU I-BamHIR-                                                 | CGGGATCCCGAGACTCTTCAACAAGACTAGCAATTTG    |
| SSU II-EcoRIF                                                 | CGGAATTCATGGTTTTCTCCATGGTGATGAGC         |
| SSU II-BamHIR-                                                | CGGGATCCCGGACTTGGCCATCAATGCTAAAACC       |
| TPT1-EcoRIF                                                   | CGGAATTCATGGCCATACTAAGTCAAATAGG          |
| TPT1-BamHIR-                                                  | CGGGATCCCATTTTTGCCGATGAAGAACGAAATC       |
| TPT2-EcoRIF                                                   | CGGAATTCATGTCTATGCGAAAAGGTGTAATC         |
| TPT2-BamHIR-                                                  | CGGGATCCCATTTTTGCCGATGAAGAAGAAAATC       |
| <i>For cloning in pEAQHT and tobacco transient expression</i> |                                          |
| TPS10-NruIF                                                   | CTAGTCGCGAATGGCTTCTTCTTCTACTAATAAG       |
| TPS10-XmaIR                                                   | TCCCCCGGGTATTGATATTTGACAGATTCAATCAG      |
| TPS16-NruIF                                                   | CTAGTCGCGAATGGAGCTGTGCACACAAACCG         |
| TPS16-XhoIR                                                   | CCGCTCGAGCTATATAATAGGATCAATAAGTATCC      |
| TPS18-NruIF                                                   | CTAGTCGCGATGATAATTGGCTATAGAATCAATTC      |
| dTPS18-NruIF                                                  | CTAGTCGCGATGGTCCCTTCAAATATTTCACTAAATG    |
| TPS18-XmaIR                                                   | TCCCCCGGGTTCATCGATTATGGAGTGGTTTGTAATGAC  |
| TPS41-NruIF                                                   | CTAGTCGCGAATGCTGGTAATTACATCCAATTAC       |
| dTPS41-NruIF                                                  | CTAGTCGCGAATGAGGAATTTGAGAGAAGAGATA       |
| TPS41-XmaIR                                                   | TCCCCCGGGGGCTTTCTGAAAAAGAACTTTGG         |
| CPT1-NruIF                                                    | CTAGTCGCGAATGAGTTCTTTGGTTCTTCAATGTTG     |
| CPT1-XmaIR                                                    | TCCCCCGGGATATGTGTGTCCACCAAACGTCTATG      |
| CPT2-NruIF                                                    | CTAGTCGCGATGAACTCTTCAATAGTGTCTCAAC       |
| dCPT2-NruIF                                                   | CTAGTCGCGATGCAAATCTAAAGCTGCCTCTAACAATGTC |

|                    |                                        |
|--------------------|----------------------------------------|
| CPT2-XmaIR         | TCCCCCGGGTCAATATGTGTGTCCACCAAACGTC     |
| CPT6-NruIF         | CTAGTCGCGATGAACTCTTTGTTTGTAGGGAGGCC    |
| CPT6-XmaIR         | TCCCCCGGGTCAATATGTGTGTCCACCAAACGTCTATG |
| CPS-NruIF          | CTAGTCGCGAATGTGCATCTCAGCTTCTTTTTTAAG   |
| dCPS-NruIF         | CTAGTCGCGATGGGTTCGTTGCCGGTTATCAAGTGG   |
| CPS-XmaIR          | TCCCCCGGGAACACTCTTTCAAATAGCACTTTGGC    |
| KS-NruIF           | CTAGTCGCGAATGTCTGCTACCATTATTTTTCTGCC   |
| dKS-NruIF          | CTAGTCGCGATGCGAGGACCGGATTTTGCTCTTCAATG |
| KS-XmaIR           | TCCCCCGGGATTGTAATCAGTAATTAGTTTGAATCCC  |
| GGPS1-NruIF        | CTAGTCGCGAATGAGTCTTTCAACAACAATTACAAC   |
| dGGPS1-NruIF       | CTAGTCGCGATGGAGTTAAAGAATACGTTCTTGAAAAG |
| GGPS1-XmaIR        | TCCCCCGGGATTCTCTCTGTAAGCAATATAATTTG    |
| dTPT1-AgeIF        | CCGACCGGTATGACAGTTTTTCCAAGAATGAAAG     |
| TPT1-XmaIR         | TCCCCCGGGTTTTTGCCGATGAAGAACGAAATC      |
| dTPT2-AgeIF        | CCGACCGGTATGACAGATCTTTCCAAGAATGAATC    |
| TPT2-XmaIR         | TCCCCCGGGTTTTTGCCGATGAAGAAGAAAATC      |
| dAtTPS19-NruIF     | CTAGTCGCGATGCGTCCCTTCGACGTACTTTTC      |
| AtTPS19-XmaIR      | TCCCCCGGGTGAAAGGGTATTGGGTGGACGTAC      |
| dAtGFPS2-NruIF     | CTAGTCGCGAATGATTCCACCAGAGGGAAAATGCAATG |
| AtGFPS2-XmaIR      | TCCCCCGGGTGTGTCTGCAAGCGATGTAG          |
| <i>For qRT-PCR</i> |                                        |
| TPS3-QF            | GTTCATGGGTTGTGCAGTAAAT                 |
| TPS3-QR            | TAGGGCATGGAAATAGTGATGG                 |
| TPS4-QF            | TGCTGTTCAAAGATGGGATACA                 |
| TPS4-QR            | GTAGGGTAGGACGTTGATGTTG                 |
| TPS5-QF            | GAGGTGACGTTTCCAAATCAATAC               |
| TPS5-QR            | GCTTCCCATGTCTCCTGTATC                  |
| TPS7-QF            | AGCAGCACACCAACAAGA                     |
| TPS7-QR            | GCTAATCCCACTGACCAGAAA                  |
| TPS8-QF            | ACCTAGCAAGAATGGCACAA                   |
| TPS8-QR            | CCTAGAGGAACGGATTCAAAGAG                |
| TPS9-QF            | ATCCAGAGATGGGATGCTAATG                 |
| TPS9-QR            | CACGGTCCAGTTTACCTTCTT                  |
| TPS10-QF           | GGTGGGAGCAAGGAAATACATATC               |
| TPS10-QR           | AAGTAACACTCAACCAGTCTGTCC               |
| TPS12-QF           | GAGACAGGTTGGTTGAGTGTTA                 |
| TPS12-QR           | CATCAAAGAAGGAGGCCATTTG                 |
| TPS14-QF           | GATTGTTGCGGGCGAATTTAT                  |
| TPS14-QR           | GCTCTCTTTGTTGTTTCGTGTTT                |
| TPS16-QF           | CAACGACGTGCATGGAATGTTAAG               |

|          |                             |
|----------|-----------------------------|
| TPS16-QR | TTCCTTGCTTCTACCCTCACAAATAC  |
| TPS17-QF | CCACCAATAGTTGTTGCTTCTTG     |
| TPS17-QR | GCTTCTTCCTTTGTAACGCTATATTC  |
| TPS18-QF | GTAATAGAAGAAAGTTGCTAAGGATGG |
| TPS18-QR | ATGACTTGATTGATATGATGCTTGAC  |
| TPS19-QF | TCTTGAAGCTCCACAAAGCATCAC    |
| TPS19-QR | CAAAGCAAGTTCCACCTCCTCT      |
| TPS20-QF | TTCCCACTATGTATCCAACAAAGG    |
| TPS20-QR | TGTTGCCATAGCCTGTATATTTTCATC |
| TPS21-QF | AACTCAAGAGGTGGTTTCAAGATTG   |
| TPS21-QR | CTCAGGTCAGACACAACAGCTATG    |
| TPS24-QF | AGTTTCACCCAGCATTCCAGTTC     |
| TPS24-QR | CAACCCAGGCAGTATCGTATGAAG    |
| TPS25-QF | ATGTTTCAGAGGATGTAGCTCG      |
| TPS25-QR | GACCCCAAATCCATCTCCAG        |
| TPS27-QF | CATGTTCTTCTTGGTTTGGCTCAAG   |
| TPS27-QR | GATGAAGACACGTCACCTCTTTCC    |
| TPS28-QF | CCATGAAGAAGATGATCTATAACAAGG |
| TPS28-QR | CTAACATGTGCTGCTTCATACAAAC   |
| TPS31-QF | GAAGTATCAAGGTGGTGGAAAGA     |
| TPS31-QR | GCCTGAGAGTATTGAGGTTTCAG     |
| TPS32-QF | TTTGGACGATGGGAGTGTATG       |
| TPS32-QR | CGGTGTAAACCTCCAGTTCTT       |
| TPS33-QF | TAGGGATAGAGCAGTGGAGTGTTAC   |
| TPS33-QR | ACCTCTGTATGGCATCGGTATAAAC   |
| TPS35-QF | TCATGGAGAAGATATTTTGAAGAGG   |
| TPS35-QR | TCGTAGATAGAGATGAAGTATCGTGTC |
| TPS36-QF | GGTAAATCAGACCGCGTCTAC       |
| TPS36-QR | GTTGTTCCAAGCGCCATAAAGGTAG   |
| TPS37-QF | GGGCTTGTTAGTTCTGGAGTTT      |
| TPS37-QR | GCTATGGAAGTGGACATGAGTG      |
| TPS38-QF | GCTTCTAGCTCTCTTCAACTC       |
| TPS38-QR | GTTAGCCCACTGCTTCCCTTAT      |
| TPS39-QF | CTGGAGTTCATGTGGTCTTAGTT     |
| TPS39-QR | ATCATCCCAAAGGCGAAGG         |
| TPS40-QF | GGTAGGAGAAGGAGAAGGAGAAGG    |
| TPS40-QR | GGAGTCGGTGAGAACTCTATTGG     |
| TPS41-QF | CACTTTGGATATGTGATTGTTGATTG  |
| TPS41-QR | GCATGTGACAGACTTTATTGGTGTAC  |
| TPS46-QF | AAGGTGGGATGCAAAGAATC        |

|           |                                   |
|-----------|-----------------------------------|
| TPS46-QR  | CATTTTGGCAACATCACCA               |
| TPS47-QF  | TTGGCCTCACTGATTACTTCGACG          |
| TPS47-QR  | CCATGCCCAAATATGACCCTTCC           |
| TPS48-QF  | ATGGAAGGATTTGAACAAAGAGTGC         |
| TPS48-QR  | AAAGCTTCGATTACAGCTTTCACG          |
| TPS51-QF  | ATGGATGGATTTGGTGTATGAGGCAGAG      |
| TPS51-QR  | GATTTGGAAGGAGAAAGCACTAGC          |
| TPS52-QF  | ATGGTCGTTGGATTTGGTGGTG            |
| TPS52-QR  | GATTTGGAAGGAGAAAGCACTAGC          |
| FPPS1-QF  | CGC CGG ATT GTC CAG TAT AAA AC    |
| FPPS1-QR  | GGT CAG CAA AGC AGT CCA GAT AAT C |
| GGPPS1-QF | CAGCGGGTAAGGACCTAATAAC            |
| GGPPS1-QR | TGCCTTTGCATAGTCGAAGTAG            |
| GGPPS2-QF | CGCTACTTGCTTTCGCATTC              |
| GGPPS2-QR | CCAGCTACTAACCCTTCAGTTC            |
| GGPPS3-QF | GGGATGCACTTCTTGCATTAG             |
| GGPPS3-QR | CTACAACCTGACCAGCTACAA             |
| SSU I-QF  | GGACAGCTAGAAGGCCAATATC            |
| SSU I-QR  | GCTCCACATGCATGAATTTCC             |
| SSU II-QF | TCGAGTCCTCCGGGTATTA               |
| SSU II-QR | CACTCACCCATTTACCATATTTTC          |
| TPT1-QF   | GCGTCCGAGAAGGAGATTAATAG           |
| TPT1-QR   | GCTCAGAGGATTTAGTCACATCA           |
| TPT2-QF   | TTCGTGCTGTTGGAGAAGTAG             |
| TPT2-QR   | GCTCTTCCAATCCAGTATCACA            |
| CPT1-QF   | CAAAGGGCAACAAAGGACTTCACC          |
| CPT1-QR   | CAGGATTTGGACACTTGCTTTCAAG         |
| CPT2-QF   | GAACAAGAAGCTTGAAAGCAAGTGTC        |
| CPT2-QR   | CGTCTATGCCTTTGTTGAAAGTTAAG        |
| CPT6-QF   | TACCACCAAGTGTGCTAAATTCCC          |
| CPT6-QR   | ATGAGAGCTTCTTCTCCAAAGTCAG         |
| Ubi-QF    | CAGCTCGCTTTCTCAGTTCC              |
| Ubi-QR    | AGCTCGACAAACAGACTGGA              |

<sup>1</sup>+, has a stop codon in the sequence; -, does not contain a stop codon in the sequence. d, for truncating the N-terminal transit peptide. opti, codon optimized version.

<sup>2</sup>Restriction sites are underlined.

**Table S2** A list of terpene compounds identified from Figs 3-5 and 10.

| Identified terpenes <sup>1</sup>           | MS similarity to NIST library | Identification method | Retention indices <sup>2</sup> | Reference retention indices <sup>3</sup> | Source of reference                        |
|--------------------------------------------|-------------------------------|-----------------------|--------------------------------|------------------------------------------|--------------------------------------------|
| <b>29. Isoprene</b>                        | 99%                           | b, c                  | n.c.                           | n.r.                                     | Standard                                   |
| $\alpha$ -Thujene                          | 97%                           | a, b, c               | 929.7                          | 929.7                                    | Mandarin oil                               |
| $\alpha$ -Pinene                           | 98%                           | a, b, c               | 937.7                          | 937.7                                    | Standard                                   |
| Unknown 5                                  | 81% to 3-carene               | -                     | 971.1                          | 3-carene RI=1011.0                       | Standard                                   |
| 1,3,5-Cycloheptatriene,<br>3,7,7-trimethyl | 97%                           | a, b                  | 977.0                          | 972.6                                    | NIST 2014                                  |
| $\beta$ -Pinene                            | 97%                           | a, b, c               | 981.6                          | 981.6                                    | Standard                                   |
| Isolimonene                                | 95%                           | a, b, c               | 986.1                          | 986.1                                    | Standard                                   |
| <b>25. <math>\beta</math>-Myrcene</b>      | 93%                           | a, b, c               | 990.5                          | 990.5                                    | Standard                                   |
| (+)-2-Carene                               | 96%                           | a, b, c               | 1002.9                         | 1002.9                                   | Standard                                   |
| $\alpha$ -Phellandrene                     | 97%                           | a, b, c               | 1010.5                         | 1010.5                                   | Standard                                   |
| $\alpha$ -Terpinene                        | 96%                           | a, b, c               | 1020.6                         | 1020.6                                   | Standard                                   |
| <i>m</i> -cymene                           | 97%                           | a, b, c               | 1028.1                         | 1028.1                                   | Standard                                   |
| $\beta$ -Phellandrene                      | 95%                           | a, b, c               | 1037.4                         | 1037.4                                   | SIPHS1 (Schillmiller <i>et al.</i> , 2009) |
| <b>26. <math>\beta</math>-cis-Ocimene</b>  | 94%                           | a, b, c               | 1038.8                         | 1038.8                                   | Standard                                   |

|                                                       |                    |         |        |                     |                               |
|-------------------------------------------------------|--------------------|---------|--------|---------------------|-------------------------------|
| <b>27. <math>\beta</math>-trans-Ocimene</b>           | 99%                | a, b, c | 1049.3 | 1049.3              | Standard                      |
| $\alpha$ -Ocimene                                     | 90%                | a, b    | 1057.8 | 1056                | Jordán <i>et al.</i> (2013)   |
| $\gamma$ -Terpinene                                   | 98%                | a, b, c | 1062.8 | 1062.8              | Standard                      |
| Terpinolene                                           | 95%                | a, b, c | 1088.8 | 1088.8              | Standard                      |
| Unknown 6                                             | 87% to phellandral | -       | 1096.1 | Phellandral RI=1273 | Babushok <i>et al.</i> (2011) |
| <b>28. Linalool</b>                                   | 93%                | a, b, c | 1099.6 | 1099.6              | Standard                      |
| <i>trans</i> -p-Mentha-2,8-dienol                     | 95%                | a, b    | 1126.7 | 1127.5              | Babushok <i>et al.</i> (2011) |
| $\alpha$ -Terpineol                                   | 93%                | a, b, c | 1199.5 | 1199.5              | Standard                      |
| nerol                                                 | 95%                | a, b, c | 1230.4 | 1230.4              | Standard                      |
| geraniol                                              | 90%                | a, b, c | 1257.0 | 1257.0              | Standard                      |
| $\delta$ -Elemene                                     | 95%                | a, b    | 1332.9 | 1333.8              | Zizovic <i>et al.</i> (2007)  |
| <b>12. <math>\alpha</math>-Cedrene</b>                | 92%                | a, b, c | 1394.0 | 1394.0              | Standard                      |
| <b>4. <math>\beta</math>-Elemene</b>                  | 96%                | a, b, c | 1395.5 | 1395.5              | Standard                      |
| <b>13. <i>cis</i>-<math>\alpha</math>-Bergamotene</b> | 90%                | a, b    | 1419.6 | 1419.5              | NIST 2014                     |
| <b>20. (<i>Z</i>)-<math>\beta</math>-Farnesene</b>    | 94%                | a, b, c | 1429.6 | 1429.6              | Standard                      |
| $\beta$ -Caryophyllene                                | 95%                | a, b, c | 1432.0 | 1432.0              | Standard                      |
| <b>6. (<i>E</i>)-<math>\beta</math>-Farnesene</b>     | 96%                | a, b, c | 1454.8 | 1454.8              | Standard                      |
| $\alpha$ -Humulene                                    | 95%                | a, b, c | 1468.6 | 1468.6              | Standard                      |



|                                                      |                                                                   |         |        |                                      |                               |
|------------------------------------------------------|-------------------------------------------------------------------|---------|--------|--------------------------------------|-------------------------------|
| <b>14. <math>\beta</math>-Acoradiene</b>             | 91%                                                               | a, b    | 1469.8 | 1466                                 | Babushok <i>et al.</i> (2011) |
| <b>15. Unknown 2</b>                                 | 89% to $\beta$ -acoradiene                                        | -       | 1478.2 | $\beta$ -Acoradiene RI=1466          | Babushok <i>et al.</i> (2011) |
| <b>16. Unknown 3</b>                                 | 88% to trans-Sesquisabinene hydrate                               | -       | 1483.5 | trans-Sesquisabinene hydrate RI=1581 | Babushok <i>et al.</i> (2011) |
| Germacrene D                                         | 90%                                                               | a, b, c | 1493.0 | 1493.0                               | Ginger oil                    |
| <b>18. <i>cis</i>-muurolo-3,5-diene</b>              | 93% to <i>cis</i> -muurolo-3,5-diene<br>92% to $\alpha$ -cubebene | a, b    | 1494.0 | n.r.<br>$\alpha$ -cubebene RI=1351   | Babushok <i>et al.</i> (2011) |
| <b>1. (<i>E,E</i>)-<math>\alpha</math>-Farnesene</b> | 97%                                                               | a, b, c | 1505.3 | 1505.3                               | Standard                      |
| <b>7. <math>\beta</math>-Bisabolene</b>              | 94%                                                               | a, b, c | 1513.3 | 1513.3                               | Ginger oil                    |
| <b>3. Guaia-1(10),11-diene</b>                       | 94%                                                               | a, b    | 1515.3 | 1515                                 | Novak <i>et al.</i> (2010)    |
| <b>17. <math>\beta</math>-Curcumene</b>              | 93%                                                               | a, b    | 1518.6 | 1516                                 | Kahriman <i>et al.</i> (2011) |
| <b>22. <math>\delta</math>-Cadinene</b>              | 92%                                                               | a, b    | 1523.1 | 1524                                 | Novak <i>et al.</i> (2010)    |
| <b>19. <i>Z</i>-Nerolidol</b>                        | 94%                                                               | a, b, c | 1533.1 | 1533.1                               | Standard                      |
| <b>8. Unknown 1</b>                                  | 84% to $\alpha$ -Bergamotene                                      | -       | 1533.8 | $\alpha$ -Bergamotene RI=1434        | Babushok <i>et al.</i> (2011) |
| <b>9. <math>\alpha</math>-Bisabolene</b>             | 90%                                                               | a, b    | 1545.5 | 1541                                 | Babushok <i>et al.</i> (2011) |
| <b>2. Elemol</b>                                     | 96%                                                               | a, b    | 1557.7 | 1557                                 | Pinheiro <i>et al.</i> (2013) |
| <b>5. <i>E</i>-Nerolidol</b>                         | 95%                                                               | a, b, c | 1563.4 | 1563.4                               | Standard                      |

|                                          |                            |         |        |                             |                                       |
|------------------------------------------|----------------------------|---------|--------|-----------------------------|---------------------------------------|
| <b>10. <math>\alpha</math>-Eudesmol</b>  | 90%                        | a, b    | 1663.2 | 1664                        | Watanabe <i>et al.</i> (2005)         |
| <b>11. (Z,Z)-Farnesol</b>                | 95%                        | a, b, c | 1670.6 | 1670.6                      | SICPT6 (Akhtar <i>et al.</i> , 2013)  |
| <b>21. <math>\alpha</math>-Bisabolol</b> | 93%                        | a, b, c | 1694.8 | 1694.8                      | Standard                              |
| <b>23. Unknown 4</b>                     | 85% to $\alpha$ -springene | -       | 2059.7 | $\alpha$ -springene RI=2019 | Setzer <i>et al.</i> (2006)           |
| <b>24. ent-Kaurene</b>                   | 95%                        | a, b, c | 2079.5 | 2079.5                      | SITPS40 (Falara <i>et al.</i> , 2011) |

<sup>1</sup>Compounds listed in order of elution from the Rxi-5Sil MS column, the enzymatic terpene products are shown in bold. <sup>2</sup>Retention indices relative to C<sub>7</sub>-C<sub>40</sub> n-alkanes on the Rxi-5Sil MS column. <sup>3</sup>Reference retention indices were obtained using the similar nonpolar column.

a, identification based on retention index; b, identification based on comparison with mass spectral data; c, identification based on comparison with authentic compounds; n.c. not calculated; n.r. no reference available from the similar column.

**Akhtar TA, Matsuba Y, Schauvinhold I, Yu G, Lees HA, Klein SE, Pichersky E. 2013.** The tomato *cis*-prenyltransferase gene family. *Plant J* **73**(4): 640-652.

**Babushok VI, Linstrom PJ, Zenkevich IG. 2011.** Retention indices for frequently reported compounds of plant essential oils. *J Phys Chem Ref Data* **40**(4).

**Falara V, Akhtar TA, Nguyen TT, Spyropoulou EA, Bleeker PM, Schauvinhold I, Matsuba Y, Bonini ME, Schillmiller AL, Last RL, et al. 2011.** The tomato terpene synthase gene family. *Plant Physiol* **157**(2): 770-789.

**Jordan MJ, Margaria CA, Shaw PE, Goodner KL. 2003.** Volatile components and aroma active compounds in aqueous essence and

fresh pink guava fruit puree (*Psidium guajava* L.) by GC-MS and multidimensional GC/GC-O. *J Agric Food Chem* **51**(5): 1421-1426.

**Kahriman N, Tosun G, Terzioglu S, Karaoglu SA, Yayli N. 2011.** Chemical composition and antimicrobial activity of the essential oils from the flower, leaf, and stem of *Senecio pandurifolius*. *Rec Nat Prod* **5**(2): 82-91.

**Novak J, Novak S, Bitsch C, Franz CM. 2000.** Essential oil composition of underground parts of *Valeriana celtica* ssp from Austria and Italy. *Flavour Frag J* **15**(1): 40-42.

**Pinheiro PF, de Queiroz VT, Rondelli VM, Costa AV, Marcelino TD, Pratisoli D. 2013.** Insecticidal activity of citronella grass essential oil on *Frankliniella schultzei* and *Myzus persicae*. *Cienc Agrotec* **37**(2): 138-144.

**Schillmiller AL, Schauvinhold I, Larson M, Xu R, Charbonneau AL, Schmidt A, Wilkerson C, Last RL, Pichersky E. 2009.** Monoterpenes in the glandular trichomes of tomato are synthesized from a neryl diphosphate precursor rather than geranyl diphosphate. *Proc Natl Acad Sci U S A* **106**(26): 10865-10870.

**Setzer WN, Noletto JA, Lawton RO. 2006.** Chemical composition of the floral essential oil of *Randia matudae* from Monteverde, Costa Rica. *Flavour Frag J* **21**(2): 244-246.

**Watanabe Y, Mihara R, Mitsunaga T, Yoshimura T. 2005.** Termite repellent sesquiterpenoids from *Callitris glaucophylla* heartwood. *J Wood Sci* **51**(5): 514-519.

**Zizovic I, Stamenic M, Ivanovic J, Orlovic A, Ristic M, Djordjevic S, Petrovic SD, Skala D. 2007.** Supercritical carbon dioxide extraction of sesquiterpenes from *Valerian* root. *J Supercrit Fluid* **43**(2): 249-258.

**Table S3** A list of tomato terpene synthase genes, their characteristics, and the enzymes they encode.

| Chromosome | Locus                 | TPS       | TPS-clade | No. of Exons | Full-length cDNA obtained | Protein size (aa) | Subcellular localization   | Substrate                                | Main product                                                                          |
|------------|-----------------------|-----------|-----------|--------------|---------------------------|-------------------|----------------------------|------------------------------------------|---------------------------------------------------------------------------------------|
| 1          | Solyc01g101170        | 31        | a         | 6            | Yes                       | 555               | Cytosol <sup>c</sup>       | <i>E,E</i> -FPP                          | Viridiflorene <sup>a</sup>                                                            |
|            | Solyc01g101180        | 32        | a         | 6            | Yes                       | 548               | Cytosol <sup>c</sup>       | <i>E,E</i> -FPP<br><i>Z,Z</i> -FPP       | Viridiflorene <sup>b</sup><br>Unidentified <sup>b</sup>                               |
|            | <b>Solyc01g101190</b> | <b>33</b> | <b>a</b>  | <b>6</b>     | <b>Yes</b>                | <b>552</b>        | <b>Cytosol<sup>c</sup></b> | <b><i>E,E</i>-FPP<br/><i>Z,Z</i>-FPP</b> | <b>Guaia-1(10),11-diene<sup>c</sup><br/><math>\beta</math>-Acoradiene<sup>c</sup></b> |
|            | <b>Solyc01g101210</b> | <b>35</b> | <b>a</b>  | <b>6</b>     | <b>Yes</b>                | <b>556</b>        | <b>Cytosol<sup>c</sup></b> | <b><i>E,E</i>-FPP<br/><i>Z,Z</i>-FPP</b> | <b>Guaia-1(10),11-diene<sup>c</sup><br/>(<i>Z,Z</i>)-Farnesol<sup>c</sup></b>         |
|            | Solyc01g105870        | 3         | b         | 7            | Yes                       | 607               | Plastid <sup>c</sup>       | GPP                                      | Camphene, tricyclene <sup>b</sup>                                                     |
|            | Solyc01g105880        | 4 (MTS2)  | b         | 7            | Yes                       | 590               | Plastid <sup>c</sup>       | GPP                                      | $\beta$ -Phellandrene <sup>d</sup>                                                    |
|            | Solyc01g105890        | 5 (MTS1)  | b         | 8            | Yes                       | 609               | Plastid <sup>c</sup>       | GPP                                      | Linalool <sup>d</sup>                                                                 |
|            | Solyc01g105920        | 7         | b         | 7            | Yes                       | 592               | Plastid <sup>c</sup>       | GPP                                      | $\beta$ -Myrcene, limonene <sup>b</sup>                                               |
|            | Solyc01g105960        | 8         | b         | 7            | Yes                       | 597               | Cytosol <sup>c</sup>       | GPP<br>NPP                               | 1,8-Cineole <sup>b</sup><br>1,8-Cineole <sup>b</sup>                                  |
| 2          | Solyc02g079840        | 38        | b         | 7            | Yes                       | 546               | Cytosol <sup>c</sup>       | <i>E,E</i> -FPP                          | $\alpha$ -Bergamotene <sup>b</sup>                                                    |
|            | <b>Solyc02g079890</b> | <b>25</b> | <b>b</b>  | <b>7</b>     | <b>Yes</b>                | <b>547</b>        | <b>Cytosol<sup>c</sup></b> | <b>GPP</b>                               | <b><math>\beta</math>-Ocimene<sup>c</sup></b>                                         |
|            | <b>Solyc02g079910</b> | <b>27</b> | <b>b</b>  | <b>7</b>     | <b>Yes</b>                | <b>554</b>        | <b>Cytosol<sup>c</sup></b> | <b><i>E,E</i>-FPP</b>                    | <b><math>\alpha</math>-Farnesene<sup>c</sup></b>                                      |
|            | <b>Solyc00g154480</b> |           |           |              |                           |                   |                            |                                          |                                                                                       |
| 3          | Solyc03g006550        | 46        | e/f       | 11           | Yes                       | 821               | Cytosol <sup>c</sup>       | GGPP                                     | Geranylinalool <sup>e</sup>                                                           |
|            | <b>Solyc03g007730</b> | <b>47</b> | <b>b</b>  | <b>7</b>     | <b>Yes</b>                | <b>562</b>        | <b>Cytosol<sup>c</sup></b> | <b>DMAPP</b>                             | <b>Isoprene<sup>c</sup></b>                                                           |
| 4          | <b>Solyc04g051620</b> | <b>48</b> | <b>a</b>  | <b>8</b>     | <b>Yes</b>                | <b>560</b>        | <b>Cytosol<sup>c</sup></b> | <b><i>E,E</i>-FPP<br/><i>Z,Z</i>-FPP</b> | <b>Hedycaryol (Elemol)<sup>c</sup><br/>Unidentified<sup>c</sup></b>                   |
|            | <b>Solyc04g054380</b> | <b>28</b> | <b>a</b>  | <b>7</b>     | <b>Yes</b>                | <b>554</b>        | <b>Cytosol<sup>c</sup></b> | <b><i>E,E</i>-FPP<br/><i>Z,Z</i>-FPP</b> | <b>Hedycaryol (Elemol)<sup>c</sup><br/>Unidentified<sup>c</sup></b>                   |
| 6          | Solyc06g059885        | 9 (Sst1)  | a         | 7            | Yes                       | 548               | Cytosol <sup>c</sup>       | <i>E,E</i> -FPP                          | Germacrene <sup>f</sup>                                                               |

|    |                                                |           |            |           |            |            |                                 |                                         |                                                                                           |
|----|------------------------------------------------|-----------|------------|-----------|------------|------------|---------------------------------|-----------------------------------------|-------------------------------------------------------------------------------------------|
|    | <b>Solyc06g059910</b><br><b>Solyc06g059920</b> | <b>10</b> | <b>a</b>   | <b>7</b>  | <b>Yes</b> | <b>556</b> | <b>Cytosol<sup>c</sup></b>      | <b>Z,Z-FPP</b>                          | <b><math>\alpha</math>-Bisabolol<sup>c</sup></b>                                          |
|    | Solyc06g059930                                 | 12 (CAHS) | a          | 7         | Yes        | 548        | Cytosol <sup>c</sup>            | <i>E,E</i> -FPP                         | $\beta$ -Caryophyllene, $\alpha$ -humulene <sup>g</sup>                                   |
|    | <b>Solyc06g060180</b>                          | <b>36</b> | <b>a</b>   | <b>7</b>  | <b>Yes</b> | <b>591</b> | <b>Mitochondria<sup>b</sup></b> | <b>Z,Z-FPP</b>                          | <b><i>cis</i>-Muurola-3,5-diene<sup>c</sup></b>                                           |
|    | Solyc06g084240                                 | 40 (CPS1) | c          | 15        | Yes        | 800        | Plastid <sup>c</sup>            | GGPP                                    | Copalyl diphosphate <sup>h</sup>                                                          |
| 7  | <b>Solyc07g008680</b><br><b>Solyc07g008690</b> | <b>16</b> | <b>a</b>   | <b>7</b>  | <b>Yes</b> | <b>553</b> | <b>Cytosol<sup>c</sup></b>      | <b><i>E,E</i>-FPP</b>                   | <b><math>\delta</math>-Cadinene<sup>c</sup></b>                                           |
|    | <b>Solyc07g052120</b><br><b>Solyc07g052130</b> | <b>51</b> | <b>a</b>   | <b>7</b>  | <b>Yes</b> | <b>550</b> | <b>Cytosol<sup>c</sup></b>      | <b><i>E,E</i>-FPP</b><br><b>Z,Z-FPP</b> | <b><i>E</i>-Nerolidol<sup>c</sup></b><br><b><math>\alpha</math>-Bisabolol<sup>c</sup></b> |
|    | <b>Solyc07g052140</b><br><b>Solyc07g052150</b> | <b>52</b> | <b>a</b>   | <b>7</b>  | <b>Yes</b> | <b>551</b> | <b>Cytosol<sup>c</sup></b>      | <b><i>E,E</i>-FPP</b><br><b>Z,Z-FPP</b> | <b><i>E</i>-Nerolidol<sup>c</sup></b><br><b><math>\alpha</math>-Bisabolol<sup>c</sup></b> |
|    | Solyc07g066670<br>Solyc07g066675               | 24 (KS)   | e/f        | 15        | Yes        | 820        | Plastid <sup>c</sup>            | CPP                                     | <i>ent</i> -Kaurene <sup>b</sup>                                                          |
| 8  | Solyc08g005640                                 | 21        | e/f        | 14        | Yes        | 784        | Plastid <sup>c</sup>            | NNPP                                    | Lycosantalene <sup>i</sup>                                                                |
|    | Solyc08g005665                                 | 20 (PHS1) | e/f        | 14        | Yes        | 778        | Plastid <sup>c</sup>            | NPP                                     | $\beta$ -Phellandrene <sup>j</sup>                                                        |
|    | Solyc08g005670                                 | 19        | e/f        | 14        | Yes        | 778        | Plastid <sup>c</sup>            | NPP                                     | $\beta$ -Myrcene, $\beta$ -ocimene <sup>i</sup>                                           |
|    | <b>Solyc08g005710</b>                          | <b>41</b> | <b>c</b>   | <b>15</b> | <b>Yes</b> | <b>780</b> | <b>Mitochondria<sup>c</sup></b> | <b>GGPP</b>                             | <b>Copalyl diphosphate<sup>c</sup></b>                                                    |
|    | <b>Solyc08g005720</b>                          | <b>18</b> | <b>e/f</b> | <b>14</b> | <b>Yes</b> | <b>773</b> | <b>Mitochondria<sup>c</sup></b> | <b>NNPP</b>                             | <b>Unidentified<sup>c</sup></b>                                                           |
| 9  | Solyc09g092470                                 | 14        | a          | 7         | Yes        | 568        | Cytosol <sup>b</sup>            | <i>E,E</i> -FPP<br><i>Z,Z</i> -FPP      | $\beta$ -Bisabolene <sup>b</sup><br>$\alpha$ -Bisabolene <sup>b</sup>                     |
| 10 | Solyc10g005390                                 | 39        | g          | 7         | Yes        | 563        | Cytosol <sup>c</sup>            | GPP<br><i>E,E</i> -FPP                  | Linalool <sup>b</sup><br><i>E</i> -Nerolidol <sup>b</sup>                                 |
|    | Solyc10g005410                                 | 37        | g          | 7         | Yes        | 560        | Cytosol <sup>c</sup>            | GPP<br><i>E,E</i> -FPP                  | Linalool <sup>b</sup><br><i>E</i> -Nerolidol <sup>b</sup>                                 |
| 12 | Solyc12g006570                                 | 17        | a          | 7         | Yes        | 554        | Cytosol <sup>c</sup>            | <i>E,E</i> -FPP                         | Valencene <sup>a</sup>                                                                    |

<sup>a</sup>Bleeker *et al.* (2011). <sup>b</sup>Falara *et al.* (2011). <sup>c</sup>This work. <sup>d</sup>van Schie *et al.* (2007). <sup>e</sup>Falare *et al.* (2014). <sup>f</sup>Colby *et al.* (1998). <sup>g</sup>Schilmiller *et al.* (2010). <sup>h</sup>Bensen and Zeevaart, (1990). <sup>i</sup>Matsuba *et al.* (2013). <sup>j</sup>Schilmiller *et al.* (2009).

TPS gene numbers are adopted from Falara *et al.* (2011), terpene synthases characterized in this work are shown in bold.

**Bensen RJ, Zeevaart JAD. 1990.** Comparison of *ent*-kaurene synthetase A-activity and B-activity in cell-free-extracts from young tomato fruits of wild-type and *gib-1*, *gib-2*, and *gib-3* tomato plants. *Journal of Plant Growth and Regulation* **9**(4): 237-242.

**Bleeker PM, Spyropoulou EA, Diergaarde PJ, Volpin H, De Both MT, Zerbe P, Bohlmann J, Falara V, Matsuba Y, Pichersky E, et al. 2011.** RNA-seq discovery, functional characterization, and comparison of sesquiterpene synthases from *Solanum lycopersicum* and *Solanum habrochaites* trichomes. *Plant Molecular Biology* **77**(4-5): 323-336.

**Colby SM, Crock J, Dowdle-Rizzo B, Lemaux PG, Croteau R. 1998.** Germacrene C synthase from *Lycopersicon esculentum* cv. VFNT cherry tomato: cDNA isolation, characterization, and bacterial expression of the multiple product sesquiterpene cyclase. *Proceedings of the National Academy of Sciences, USA* **95**(5): 2216-2221.

**Falara V, Akhtar TA, Nguyen TT, Spyropoulou EA, Bleeker PM, Schauvinhold I, Matsuba Y, Bonini ME, Schillmiller AL, Last RL, et al. 2011.** The tomato terpene synthase gene family. *Plant Physiology* **157**(2): 770-789.

**Falara V, Alba JM, Kant MR, Schuurink RC, Pichersky E. 2014.** Geranylinalool synthases in solanaceae and other angiosperms constitute an ancient branch of diterpene synthases involved in the synthesis of defensive compounds. *Plant Physiology* **166**(1): 428-441.

**Matsuba Y, Nguyen TT, Wiegert K, Falara V, Gonzales-Vigil E, Leong B, Schafer P, Kudrna D, Wing RA, Bolger AM, et al. 2013.** Evolution of a complex locus for terpene biosynthesis in *Solanum*. *Plant Cell* **25**(6): 2022-2036.

**Schillmiller AL, Miner DP, Larson M, McDowell E, Gang DR, Wilkerson C, Last RL. 2010.** Studies of a biochemical factory: tomato trichome deep expressed sequence tag sequencing and proteomics. *Plant Physiology* **153**(3): 1212-1223.

**Schillmiller AL, Schauvinhold I, Larson M, Xu R, Charbonneau AL, Schmidt A, Wilkerson C, Last RL, Pichersky E. 2009.** Monoterpenes in the glandular trichomes of tomato are synthesized from a neryl diphosphate precursor rather than geranyl diphosphate. *Proceedings of the National Academy of Sciences, USA* **106**(26): 10865-10870.

**van Schie CC, Haring MA, Schuurink RC. 2007.** Tomato linalool synthase is induced in trichomes by jasmonic acid. *Plant Molecular Biology* **64**(3): 251-263.

**Table S4** A list of tomato terpene synthase pseudogenes.

| Chromosome | Locus                                              | TPS       | No. of Exons | Type of mutation                                                                                                    | Putative translated protein (aa)  |
|------------|----------------------------------------------------|-----------|--------------|---------------------------------------------------------------------------------------------------------------------|-----------------------------------|
| 1          | Between Solyc01g101190 and Solyc01g101210          | 34        | (-)3         | Deletion of exons                                                                                                   | No in frame start codon was found |
|            | Solyc01g101220                                     | 30        | (-)3(-)1     | Deletion of exons                                                                                                   | No in frame start codon was found |
|            | Solyc01g105850<br>Solyc01g105860                   | 1         | 7            | Aberrant splicing, incorrect 3' splice sequence at the end of intron 4, cloned cDNAs skip exon 5 and part of exon 6 | 400(-)                            |
|            | Solyc01g105900                                     | 6         | 7            | Deletion of about 80nt in exon 3 to cause frame shift                                                               | 165(-)                            |
|            | Solyc01g105910                                     | 2         | 3(-)         | Deletion of exons and stop codons in frame                                                                          | 131(-)                            |
|            | Solyc01g105930<br>Solyc01g105940<br>Solyc01g105950 | 22        | 7            | Large insertion in exon 2 and numerous stop codons in frame                                                         | 52(-)                             |
| 2          | Solyc02g079900<br>Solyc02g079895                   | 26        | (-)4         | Deletion of exons and mutation of 3' splice site                                                                    | No in frame start codon was found |
| 3          | <b>Solyc03g112175</b>                              | <b>49</b> | <b>(-)2</b>  | <b>Only the last two exons were found.</b>                                                                          | <b>(-)92</b>                      |
| 4          | <b>Between Solyc04g005100 and Solyc04g005120</b>   | <b>50</b> | <b>2(-)2</b> | <b>Deletion of exons</b>                                                                                            | <b>51(-)</b>                      |
| 5          | Solyc05g026590<br>Solyc05g026600                   | 43        | 7            | Insertion of an extra T in first exon to cause frame shift                                                          | 30(-)                             |
| 6          | Between Solyc06g059885 and Solyc06g059880          | 23        | (-)1         | Deletion of exons                                                                                                   | No in frame start codon was found |
|            | Part of Solyc06g059930                             | 11        | 2(-)2(-)     | Deletion of exons                                                                                                   | 50(-)                             |
|            | Solyc06g060010<br>Solyc06g060013                   | 13        | 7            | Insertion in exon 2 to cause frame shift                                                                            | 156(-)                            |
| 7          | Solyc07g051940                                     | 15        | 7            | The end of the first exon has a deletion including                                                                  | 29(-).                            |

|    |                       |           |             |                                                                                              |                                          |
|----|-----------------------|-----------|-------------|----------------------------------------------------------------------------------------------|------------------------------------------|
|    |                       |           |             | the splice site, so the intron is not spliced correctly, cloned cDNA has stop codon in frame |                                          |
| 9  | Solyc09g065230        | 44        | (-)3(-)     | Deletion of exons                                                                            | No in frame start codon was found        |
| 10 | Solyc10g005420        | 42        | (-)4(-)     | Deletion of exons to cause frame shift                                                       | 15(-)                                    |
|    | <b>Solyc10g052745</b> | <b>53</b> | <b>(-)2</b> | <b>Deletion of exons</b>                                                                     | <b>No in frame start codon was found</b> |
| 12 | Solyc12g019240        | 29        | (-)1(g)2(g) | Deletion of exons                                                                            | No in frame start codon was found        |

TPS gene numbers and type of mutation are adopted from Falara *et al.* (2011), the new terpene synthase pseudogenes identified in this work are shown in bold.



**Table S5** A list of the *trans*-prenyltransferase genes in tomato.

| TPT           | Locus          | No. of exons | Predicted product <sup>1</sup> | Main Product         | Subcellular Localization  |
|---------------|----------------|--------------|--------------------------------|----------------------|---------------------------|
| FPPS1         | Solyc12g015860 | 12           | C15                            | FPP <sup>a</sup>     | Cytosol <sup>b</sup>      |
| <b>GGPPS1</b> | Solyc11g011240 | 1            | C20                            | GGPP <sup>b, c</sup> | Plastid <sup>b</sup>      |
| <b>GGPPS2</b> | Solyc04g079960 | 1            | C20                            | GGPP <sup>b, c</sup> | Plastid <sup>b</sup>      |
| SPPS          | Solyc07g061990 | 6            | C20                            | SPP <sup>d</sup>     | Plastid <sup>d</sup>      |
| DPPS          | Solyc08g023470 | 12           | ≥C30                           | DPP <sup>d</sup>     | Cytosol <sup>d</sup>      |
| <b>GGPPS3</b> | Solyc02g085700 | 1            | C20                            | GGPP <sup>b</sup>    | Plastid <sup>b</sup>      |
| <b>TPT1</b>   | Solyc02g085710 | 1            | C20                            | n.d. <sup>b</sup>    | Mitochondria <sup>b</sup> |
| <b>TPT2</b>   | Solyc02g085720 | 1            | C20                            | n.d. <sup>b</sup>    | Mitochondria <sup>b</sup> |
| <b>SSU I</b>  | Solyc07g064660 | 1            | C20                            | n.d. <sup>b</sup>    | Plastid <sup>b</sup>      |
| <b>SSU II</b> | Solyc09g008920 | 2            | C20                            | n.d. <sup>b</sup>    | Plastid <sup>b</sup>      |

<sup>1</sup>Prediction of *trans*-prenyltransferase activity was made by the well-established “three floors” model of TPT product chain-length determination mechanism (Wang *et al.*, 2016).

<sup>a</sup>Gaffe *et al.* (2000). <sup>b</sup>This work. <sup>c</sup>Ament *et al.* (2006). <sup>d</sup>Jones *et al.* (2013). n.d., not detected. Enzymes characterized in this work are shown in bold.

**Ament K, Van Schie CC, Bouwmeester HJ, Haring MA, Schuurink RC. 2006.** Induction of a leaf specific geranylgeranyl pyrophosphate synthase and emission of (*E,E*)-4,8,12-trimethyltrideca-1,3,7,11-tetraene in tomato are dependent on both jasmonic acid and salicylic acid signaling pathways. *Planta* **224**(5): 1197-1208.

**Gaffe J, Bru JP, Causse M, Vidal A, Stamitti-Bert L, Carde JP, Gallusci P. 2000.** *LeFPPS1*, a tomato farnesyl pyrophosphate gene highly expressed during early fruit development. *Plant Physiology* **123**(4): 1351-1362.

**Jones MO, Perez-Fons L, Robertson FP, Bramley PM, Fraser PD. 2013.** Functional characterization of long-chain prenyl diphosphate synthases from tomato. *Biochemical Journal* **449**(3): 729-740.

**Wang CY, Chen QW, Fan DJ, Li JX, Wang GD, Zhang P. 2016.** Structural analyses of short-chain prenyltransferases identify an evolutionarily conserved GFPPS clade in Brassicaceae plants. *Molecular Plant* **9**(2): 195-204.

**Table S6** A list of terpene compounds produced by all the functional tomato terpene synthases.

| TPS | Substrate                                 | Products                                                                                                                                                                                                                                                                                                                                                                                                                                    | Reference                                                                                  |
|-----|-------------------------------------------|---------------------------------------------------------------------------------------------------------------------------------------------------------------------------------------------------------------------------------------------------------------------------------------------------------------------------------------------------------------------------------------------------------------------------------------------|--------------------------------------------------------------------------------------------|
| 3   | <b>GPP</b>                                | <b>Camphene</b> , tricyclene, $\beta$ -Myrcene, limonene, $\alpha$ -pinene, sabinene, $\beta$ -pinene, unidentified                                                                                                                                                                                                                                                                                                                         | Falara <i>et al.</i> (2011)                                                                |
| 4   | <b>GPP</b>                                | <b><math>\beta</math>-Phellandrene</b> , $\beta$ -myrcene, sabinene                                                                                                                                                                                                                                                                                                                                                                         | Van Schie <i>et al.</i> (2007)                                                             |
| 5   | <b>GPP</b><br><i>E,E</i> -FPP             | <b>Linalool</b><br><b><i>E</i>-Nerolidol</b>                                                                                                                                                                                                                                                                                                                                                                                                | Van Schie <i>et al.</i> (2007)                                                             |
| 7   | <b>GPP</b>                                | <b><math>\beta</math>-Myrcene</b> , limonene, $\alpha$ -pinene, $\beta$ -pinene, linalool, sabinene                                                                                                                                                                                                                                                                                                                                         | Falara <i>et al.</i> (2011)                                                                |
| 8   | <b>GPP</b><br><b>NPP</b>                  | <b>1,8-Cineole</b> , $\alpha$ -pinene<br><b>1,8-Cineole</b> , $\alpha$ -pinene                                                                                                                                                                                                                                                                                                                                                              | Falara <i>et al.</i> (2011)                                                                |
| 9   | GPP<br><i>E,E</i> -FPP<br><i>Z,Z</i> -FPP | <b><math>\beta</math>-Myrcene</b> , limonene, $\alpha$ -pinene, (+)-2-carene, $\alpha$ -terpinene, terpinolene<br><b>Germacrene C</b> , germacrene A, germacrene B, germacrene D<br><b>Germacrene C</b> , $\alpha$ -humulene, $\beta$ -bisabolene, germacrene A, germacrene B                                                                                                                                                               | Bleeker <i>et al.</i> (2011)<br>Colby <i>et al.</i> (1998)<br>Bleeker <i>et al.</i> (2011) |
| 10  | <i>Z,Z</i> -FPP                           | <b><math>\alpha</math>-Bisabolol</b>                                                                                                                                                                                                                                                                                                                                                                                                        | This work                                                                                  |
| 12  | GPP<br><i>E,E</i> -FPP<br><i>Z,Z</i> -FPP | <b><math>\beta</math>-Myrcene</b> , limonene, terpinolene, <i>E</i> - $\beta$ -ocimene<br><b><math>\beta</math>-Caryophyllene</b> , <b><math>\alpha</math>-humulene</b><br><b><math>\gamma</math>-Curcumene</b> , <b><math>\beta</math>-bisabolene</b> , <i>Z</i> - $\gamma$ -bisabolene                                                                                                                                                    | Bleeker <i>et al.</i> (2011)<br>Schilmiller <i>et al.</i> (2010)                           |
| 14  | <i>E,E</i> -FPP<br><i>Z,Z</i> -FPP        | <b><math>\beta</math>-Bisabolene</b> , <i>E</i> -nerolidol, <i>E</i> - $\gamma$ -bisabolene, <i>Z</i> - $\gamma$ -bisabolene, <i>E</i> - $\alpha$ -bisabolene<br><b><i>E</i>-<math>\alpha</math>-Bisabolene</b> , $\beta$ -bisabolene, <i>E</i> - $\gamma$ -bisabolene, <i>Z</i> - $\gamma$ -bisabolene,                                                                                                                                    | Falara <i>et al.</i> (2011)                                                                |
| 16  | <i>E,E</i> -FPP                           | <b><math>\delta</math>-Cadinene</b>                                                                                                                                                                                                                                                                                                                                                                                                         | This work                                                                                  |
| 17  | GPP<br><i>E,E</i> -FPP<br><i>Z,Z</i> -FPP | <b><math>\beta</math>-Myrcene</b> , (+)-2-carene, limonene, terpinolene, <i>E</i> - $\beta$ -ocimene, <i>Z</i> - $\beta$ -ocimene, $\gamma$ -terpinene, linalool<br><b>Valencene</b> , $\gamma$ -gurjunene, <i>E</i> - $\beta$ -farnesene, $\alpha$ -farnesene<br><b><i>Z</i>-<math>\gamma</math>-bisabolene</b> , <i>E</i> - $\alpha$ -bergamotene, <i>Z</i> - $\alpha$ -bergamotene, <i>E</i> - $\gamma$ -bisabolene, $\beta$ -bisabolene | Bleeker <i>et al.</i> (2011)                                                               |
| 18  | <b>NNPP</b>                               | <b>Unidentified</b>                                                                                                                                                                                                                                                                                                                                                                                                                         | This work                                                                                  |
| 19  | <b>NPP</b>                                | <b><math>\beta</math>-Ocimene</b> , $\beta$ -myrcene                                                                                                                                                                                                                                                                                                                                                                                        | Matsuba <i>et al.</i> (2013)                                                               |
| 20  | <b>NPP</b>                                | <b><math>\beta</math>-Phellandrene</b> , (+)-2-carene, limonene, $\alpha$ -phellandrene, $\alpha$ -terpinene                                                                                                                                                                                                                                                                                                                                | Schilmiller <i>et al.</i> (2009)                                                           |
| 21  | <b>NNPP</b>                               | <b>Lycosantalene</b>                                                                                                                                                                                                                                                                                                                                                                                                                        | Matsuba <i>et al.</i> (2013)                                                               |
| 24  | <b>CPP</b>                                | <b><i>Ent</i>-Kaurene</b>                                                                                                                                                                                                                                                                                                                                                                                                                   | Falara <i>et al.</i> (2011)                                                                |
| 25  | <b>GPP</b>                                | <b><i>E</i>-<math>\beta</math>-ocimene</b> , <i>Z</i> - $\beta$ -ocimene, linalool, $\beta$ -Myrcene                                                                                                                                                                                                                                                                                                                                        | This work                                                                                  |
| 27  | <i>E,E</i> -FPP                           | <b><math>\alpha</math>-Farnesene</b>                                                                                                                                                                                                                                                                                                                                                                                                        | This work                                                                                  |
| 28  | <i>E,E</i> -FPP<br><i>Z,Z</i> -FPP        | <b>Elemol (hedycaryol)</b><br><b>Unidentified</b> , $\beta$ -bisabolene, <i>E</i> - $\alpha$ -bisabolene, $\alpha$ -eudesmol, <i>Z,Z</i> -farnesol                                                                                                                                                                                                                                                                                          | This work                                                                                  |
| 31  | <i>E,E</i> -FPP                           | <b>Viridiflorene</b>                                                                                                                                                                                                                                                                                                                                                                                                                        | Bleeker <i>et al.</i> (2011)                                                               |
| 32  | <i>E,E</i> -FPP<br><i>Z,Z</i> -FPP        | <b>Viridiflorene</b><br><b>Unidentified</b>                                                                                                                                                                                                                                                                                                                                                                                                 | Falara <i>et al.</i> (2011)                                                                |
| 33  | <i>E,E</i> -FPP<br><i>Z,Z</i> -FPP        | <b>Guaia-1(10),11-diene</b><br><b><math>\beta</math>-Acoradiene</b> , $\beta$ -curcumene, $\alpha$ -cedrene, <i>Z</i> - $\alpha$ -bergamotene, unidentified                                                                                                                                                                                                                                                                                 | This work                                                                                  |
| 35  | <i>E,E</i> -FPP<br><i>Z,Z</i> -FPP        | <b>Guaia-1(10),11-diene</b> , $\beta$ -elemene (germacrene A)<br><b><i>Z,Z</i>-Farnesol</b> , $\beta$ -acoradiene                                                                                                                                                                                                                                                                                                                           | This work                                                                                  |
| 36  | <i>Z,Z</i> -FPP                           | <b><i>cis</i>-Muurolo-3,5-diene</b> , $\beta$ -acoradiene                                                                                                                                                                                                                                                                                                                                                                                   | This work                                                                                  |

|    |                                    |                                                                                                                                                                                     |                             |
|----|------------------------------------|-------------------------------------------------------------------------------------------------------------------------------------------------------------------------------------|-----------------------------|
| 37 | GPP<br><i>E,E</i> -FPP             | <b>Linalool</b><br><i>E</i> -Nerolidol                                                                                                                                              | Falara <i>et al.</i> (2011) |
| 38 | <i>E,E</i> -FPP                    | <i>E</i> - $\alpha$ -Bergamotene                                                                                                                                                    | Falara <i>et al.</i> (2011) |
| 39 | GPP<br><i>E,E</i> -FPP             | <b>Linalool</b><br><i>E</i> -Nerolidol                                                                                                                                              | Falara <i>et al.</i> (2011) |
| 40 | <b>GGPP</b>                        | <b>Copalyl diphosphate</b>                                                                                                                                                          | Bensen and Zeevaart, (1990) |
| 41 | <b>GGPP</b>                        | <b>Copalyl diphosphate</b>                                                                                                                                                          | This work                   |
| 46 | <b>GGPP</b>                        | <b>Geranylinalool</b>                                                                                                                                                               | Falara <i>et al.</i> (2014) |
| 47 | <b>DMAPP</b>                       | <b>Isoprene</b>                                                                                                                                                                     | This work                   |
| 48 | <i>E,E</i> -FPP<br><i>Z,Z</i> -FPP | <b>Elemol (hedycaryol)</b><br>Unidentified                                                                                                                                          | This work                   |
| 51 | <i>E,E</i> -FPP<br><i>Z,Z</i> -FPP | <i>E</i> -Nerolidol, <i>E</i> - $\beta$ -farnesene<br>$\alpha$ -Bisabolol, <i>Z</i> -nerolidol, <i>E</i> - $\alpha$ -bisabolene, $\beta$ -bisabolene, <i>Z</i> - $\beta$ -farnesene | This work                   |
| 52 | <i>E,E</i> -FPP<br><i>Z,Z</i> -FPP | <i>E</i> -Nerolidol, <i>E</i> - $\beta$ -farnesene<br>$\alpha$ -Bisabolol, <i>Z</i> -nerolidol, <i>E</i> - $\alpha$ -bisabolene, $\beta$ -bisabolene, <i>Z</i> - $\beta$ -farnesene | This work                   |

The main product of each TPS enzyme using the corresponding substrate is shown in bold. The preferred substrates are shown in bold, considering their subcellular localizations. Structures of terpene compounds can be found in Fig. 11. TPS enzymes characterized in this work are shown in bold. Elemol is the thermal breakdown product of (+)-hedycaryol (Hattan *et al.*, 2016);  $\beta$ -elemene and  $\delta$ -elemene are the thermal rearrangement of germacrene A and germacrene C, respectively (Colby *et al.*, 1998). References can be found in Table S3.

**Table S7** A list of Arabidopsis terpene synthase genes, their characteristics, and the enzymes they encode.

| Chromosome | AGI No.       | TPS | TPS-clade | No. of Exons | Protein size (aa) | Subcellular localization | Substrate       | Main product                                             | Reference                                                      |
|------------|---------------|-----|-----------|--------------|-------------------|--------------------------|-----------------|----------------------------------------------------------|----------------------------------------------------------------|
| 1          | At1g31950     | 29  | a         | 7            | 607               | M/P                      | Unknown         | -                                                        | -                                                              |
|            | At1g33750     | 22  | a         | 6            | 603               | M/P                      | <i>E,E</i> -FPP | ( <i>E</i> )- $\beta$ -Farnesene,<br>$\alpha$ -farnesene | Wang <i>et al.</i> (2016)                                      |
|            | At1g48800     | 28  | a         | 7            | 603               | M/P                      | Unknown         | -                                                        | -                                                              |
|            | At1g61120     | 4   | e/f       | 12           | 877               | <u>C</u>                 | GGPP            | Geranylinalool                                           | Herde <i>et al.</i> (2008)                                     |
|            | At1g61680     | 14  | g         | 7            | 569               | <u>P</u>                 | GPP             | Linalool                                                 | Chen <i>et al.</i> (2003)                                      |
|            | At1g66020     | 26  | a         | 7            | 598               | M/P                      | GGPP            | Unknown diterpenes                                       | Wang <i>et al.</i> (2016)                                      |
|            | At1g70080     | 6   | a         | 7            | 611               | M/P                      | GGPP            | Dolabelladienol                                          | Wang <i>et al.</i> (2016)                                      |
|            | At1g79460-KS1 | 32  | e/f       | 14           | 785               | <u>P</u>                 | <i>Ent</i> -CPP | <i>Ent</i> -kaurene                                      | Yamaguchi <i>et al.</i> (1998); Helliwell <i>et al.</i> (2001) |
| 2          | At2g23230     | 5   | a         | 7            | 606               | M/P                      | Unknown         | -                                                        | -                                                              |
|            | At2g24210     | 10  | b         | 7            | 591               | <u>P</u>                 | GPP             | ( <i>E</i> )- $\beta$ -ocimene, myrcene                  | Bohlmann <i>et al.</i> (2000)                                  |
| 3          | At3g14490     | 17  | a         | 7            | 601               | P                        | GFPP            | Sesquiterpene blend                                      | Huang <i>et al.</i> (2017)                                     |
|            | At3g14520     | 18  | a         | 7            | 605               | <u>P</u>                 | GFPP            | (+)-thalianatriene                                       | Shao <i>et al.</i> (2017); Chen <i>et al.</i> (2019)           |
|            | At3g14540     | 19  | a         | 7            | 602               | <u>P</u>                 | GFPP            | (-)-retigeranin B                                        | Shao <i>et al.</i> (2017); Chen <i>et al.</i> (2019)           |
|            | At3g25810     | 24  | b         | 7            | 598               | P                        | GPP             | Monoterpene blend                                        | Chen <i>et al.</i> (2003)                                      |
|            | At3g25820     | 27  | b         | 7            | 600               | <u>P</u>                 | GPP             | 1,8-Cineole                                              | Chen <i>et al.</i> (2004); Roos <i>et al.</i> (2015)           |
|            | At3g25830     | 23  | b         | 7            | 600               | <u>P</u>                 | GPP             | 1,8-Cineole                                              | Chen <i>et al.</i> (2004)                                      |
|            | At3g29110     | 16  | a         | 7            | 595               | P                        | Unknown         | -                                                        | -                                                              |
|            | At3g29190     | 15  | a         | 7            | 601               | P                        | Unknown         | -                                                        | -                                                              |
|            | At3g29410     | 25  | a         | 7            | 603               | <u>P</u>                 | GFPP            | (-)-ent-quiannulatene,<br>(-)-variculatriene A           | Huang <i>et al.</i> (2017); Chen <i>et al.</i> (2019)          |
|            | At3g32030     | 30  | a         | 7            | 604               | <u>P</u>                 | GFPP            | (+)-Astallatene                                          | Huang <i>et al.</i> (2017); Chen <i>et al.</i> (2019)          |
| 4          | At4g02780-CPS | 31  | c         | 15           | 802               | <u>P</u>                 | GGPP            | <i>Ent</i> -CPP                                          | Sun and Kamlya, 1997; Helliwell <i>et al.</i> (2001)           |

|   |               |    |   |   |     |          |                        |                                                              |                              |
|---|---------------|----|---|---|-----|----------|------------------------|--------------------------------------------------------------|------------------------------|
|   | At4g13280     | 12 | a | 8 | 524 | C        | <i>E,E</i> -FPP        | (Z)- $\gamma$ -bisabolene                                    | Ro <i>et al.</i> (2006)      |
|   | At4g13300     | 13 | a | 7 | 554 | C        | <i>E,E</i> -FPP        | (Z)- $\gamma$ -bisabolene                                    | Ro <i>et al.</i> (2006)      |
|   | At4g15870     | 1  | a | 7 | 598 | P        | Unknown                | -                                                            | -                            |
|   | At4g16730-Ws  | 2  | b | 7 | 589 | <u>P</u> | GPP<br><i>E,E</i> -FPP | (E)- $\beta$ -ocimene, myrcene<br>(E,E)- $\alpha$ -farnesene | Huang <i>et al.</i> (2010)   |
|   | At4g16740     | 3  | b | 7 | 565 | <u>P</u> | GPP<br><i>E,E</i> -FPP | (E)- $\beta$ -ocimene, myrcene<br>(E,E)- $\alpha$ -farnesene | Fäldt <i>et al.</i> (2003)   |
|   | At4g20210     | 8  | a | 7 | 600 | <u>P</u> | GGPP                   | Rhizathalene A                                               | Vaughan <i>et al.</i> (2013) |
|   | At4g20230     | 9  | a | 7 | 607 | M/P      | GGPP                   | Unidentified diterpene                                       | Wang <i>et al.</i> (2016)    |
|   | At4g20200     | 7  | a | 7 | 603 | P        | Unknown                | -                                                            | -                            |
| 5 | At5g23960     | 21 | a | 7 | 547 | C        | <i>E,E</i> -FPP        | (E)- $\beta$ -caryophyllene                                  | Chen <i>et al.</i> (2003)    |
|   | At5g44630     | 11 | a | 7 | 557 | C        | <i>E,E</i> -FPP        | Several sesquiterpenes                                       | Tholl <i>et al.</i> (2005)   |
|   | At5g48110-Cvi | 20 | a | 8 | 592 | <u>P</u> | GGPP                   | Dolathaliatriene,<br>dolabelladienol                         | Wang <i>et al.</i> (2016)    |

TPS gene numbers are adopted from Aubourg *et al.* (2002). Underlined letters indicate the experimentally proved subcellular localizations and the other localizations were predicted by the TargetP and ChloroP programs. Ws, *Arabidopsis thaliana* Wassilewskija ecotype; Cvi, *A. thaliana* Cape Verde Islands ecotype. P, plastid; M, mitochondria; C, cytosol.

**Aubourg S, Lecharny A, Bohlmann J. 2002.** Genomic analysis of the terpenoid synthase (AtTPS) gene family of *Arabidopsis thaliana*. *Molecular Genetics and Genomics* **267**(6): 730-745.

**Bensen RJ, Zeevaart JAD. 1990.** Comparison of *ent*-kaurene synthetase A-activity and B-activity in cell-free-extracts from young tomato fruits of wild-type and *gib-1*, *gib-2*, and *gib-3* tomato plants. *Journal of Plant Growth Regulation* **9**(4): 237-242.

**Bohlmann J, Martin D, Oldham NJ, Gershenzon J. 2000.** Terpenoid secondary metabolism in *Arabidopsis thaliana*: cDNA cloning, characterization, and functional expression of a myrcene/(E)-beta-ocimene synthase. *Archives of Biochemistry and Biophysics* **375**(2): 261-269.

**Chen F, Ro DK, Petri J, Gershenzon J, Bohlmann J, Pichersky E, Tholl D. 2004.** Characterization of a root-specific *Arabidopsis*

terpene synthase responsible for the formation of the volatile monoterpene 1,8-cineole. *Plant Physiology* **135**(4): 1956-1966.

**Chen F, Tholl D, D'Auria JC, Farooq A, Pichersky E, Gershenzon J. 2003.** Biosynthesis and emission of terpenoid volatiles from *Arabidopsis* flowers. *Plant Cell* **15**(2): 481-494.

**Chen QW, Jiang T, Liu YX, Liu HL, Zhao T, Liu ZX, Gan XC, Hallab A, Wang XM, He J, et al. 2019.** Recently duplicated sesterterpene (C25) gene clusters in *Arabidopsis thaliana* modulate root microbiota. *Science China-Life Sciences* **62**(7): 947-958.

**Faldt J, Arimura G, Gershenzon J, Takabayashi J, Bohlmann J. 2003.** Functional identification of AtTPS03 as (*E*)-beta-ocimene synthase: a monoterpene synthase catalyzing jasmonate- and wound-induced volatile formation in *Arabidopsis thaliana*. *Planta* **216**(5): 745-751.

**Helliwell CA, Sullivan JA, Mould RM, Gray JC, Peacock WJ, Dennis ES. 2001.** A plastid envelope location of *Arabidopsis entkaurene* oxidase links the plastid and endoplasmic reticulum steps of the gibberellin biosynthesis pathway. *Plant Journal* **28**(2): 201-208.

**Herde M, Gartner K, Kollner TG, Fode B, Boland W, Gershenzon J, Gatz C, Tholl D. 2008.** Identification and regulation of TPS04/GES, an *Arabidopsis* geranylinalool synthase catalyzing the first step in the formation of the insect-induced volatile C(16)-homoterpene TMTT. *Plant Cell* **20**(4): 1152-1168.

**Huang AC, Kautsar SA, Hong YJ, Medema MH, Bond AD, Tantillo DJ, Osbourn A. 2017.** Unearthing a sesterterpene biosynthetic repertoire in the Brassicaceae through genome mining reveals convergent evolution. *Proceedings of the National Academy of Sciences, USA* **114**(29): E6005-E6014.

**Huang MS, Abel C, Sohrabi R, Petri J, Haupt I, Cosimano J, Gershenzon J, Tholl D. 2010.** Variation of herbivore-induced volatile terpenes among *Arabidopsis* ecotypes depends on allelic differences and subcellular targeting of two terpene synthases, TPS02 and TPS03. *Plant Physiology* **153**(3): 1293-1310.

**Ro DK, Ehling J, Keeling CI, Lin R, Mattheus N, Bohlmann J. 2006.** Microarray expression profiling and functional characterization of AtTPS genes: Duplicated *Arabidopsis thaliana* sesquiterpene synthase genes At4g13280 and At4g13300 encode root-specific and wound-inducible (*Z*)-gamma-bisabolene synthases. *Archives of Biochemistry and Biophysics* **448**(1-2): 104-116.

**Roos J, Bejai S, Mozuraitis R, Dixelius C. 2015.** Susceptibility to *Verticillium longisporum* is linked to monoterpene production by TPS23/27 in *Arabidopsis*. *Plant Journal* **81**(4): 572-585.

**Shao J, Chen QW, Lv HJ, He J, Liu ZF, Lu YN, Liu HL, Wang GD, Wang Y. 2017.** (+)-Thalianatriene and (-)-retigeranin B catalyzed by sesterterpene synthases from *Arabidopsis thaliana*. *Organic Letters* **19**(7): 1816-1819.

**Tholl D, Chen F, Petri J, Gershenzon J, Pichersky E. 2005.** Two sesquiterpene synthases are responsible for the complex mixture of sesquiterpenes emitted from *Arabidopsis* flowers. *Plant Journal* **42**(5): 757-771.

**Vaughan MM, Wang Q, Webster FX, Kiemle D, Hong YJ, Tantillo DJ, Coates RM, Wray AT, Askew W, O'Donnell C, et al. 2013.** Formation of the unusual semivolatile diterpene rhizathalene by the *Arabidopsis* class I terpene synthase TPS08 in the root stele is involved in defense against belowground herbivory. *Plant Cell* **25**(3): 1108-1125.

**Wang Q, Jia MR, Huh JH, Muchlinski A, Peters RJ, Tholl D. 2016.** Identification of a dolabellane type diterpene synthase and other root-expressed diterpene synthases in *Arabidopsis*. *Frontiers in Plant Science* **7**.

**Yamaguchi S, Sun TP, Kawaide H, Kamiya Y. 1998.** The *GA2* locus of *Arabidopsis thaliana* encodes *ent*-kaurene synthase of gibberellin biosynthesis. *Plant Physiology* **116**(4): 1271-1278.

1 **Methods S1 Details on experimental procedures.**

2 **Plant growth conditions**

3 Tomato seeds were germinated on moistened filter paper. After germination, the  
4 seedlings were transplanted and grown in soil in a controlled growth room maintained  
5 under 16 h of light ( $300 \mu\text{E m}^{-2}\text{S}^{-1}$ ; Valoya LED grow lights, Helsinki, Finland) at  $28^\circ\text{C}$   
6 and 8 h of dark at  $20^\circ\text{C}$ . *Nicotiana benthamiana* and *Arabidopsis thaliana* (Col-0  
7 ecotype) seeds were sown in potting soil, after germination the seedlings were transferred  
8 and grown in soil in a growth chamber under controlled conditions of light intensity of  
9  $200 \mu\text{E m}^{-2}\text{S}^{-1}$  (mixed cool-white and incandescent bulbs) for 16 h light period, and  
10 day/night temperature of  $25/20^\circ\text{C}$ .

11

12 **RNA isolation, cDNA synthesis and quantitative real-time PCR**

13 Total RNA was isolated using the E.Z.N.A Plant RNA Kit (Omega Bio-tek, Norcross,  
14 GA, USA) and incubated with DNase I (Promega, Madison, WI, USA) to avoid genomic  
15 DNA contamination according to the manufacture's protocol. One microgram of total  
16 RNA was used to synthesize cDNA by using the High Capacity cDNA Reverse  
17 Transcription Kit (Thermo Fisher, Waltham, MA, USA). For quantitative real-time PCR  
18 (RT-qPCR),  $1 \mu\text{L}$  of the 10-fold diluted cDNA and gene-specific primers were applied to  
19  $10 \mu\text{L}$  SYBR Green reactions (PowerUp SYBR Green Master Mix, Thermo Fisher),  
20 which were run on a Real-Time PCR System (StepOnePlus, Thermo Fisher) with the  
21 following cycles:  $95^\circ\text{C}$  for 10 min, followed by 40 cycles of  $95^\circ\text{C}$  for 15 s and  $60^\circ\text{C}$  for 1  
22 min, and a melting curve analysis. Gene expression values were calculated according to  
23 the previously described comparative  $C_T$  method (Schmittgen & Livak, 2008). For  
24 normalizing gene expressions, *Ubiquitin (Solyc11g071260)* was used as a control. Three  
25 biological replicates were used for each point with three or more technical replicates.  
26 Primers used are listed in Table S1.



27

## 28 **Protein expression in *Escherichia coli* and purification**

29 For enzymatic assays, TPS genes without their fragments corresponding to putative  
30 transit peptides were cloned upstream and in-frame of the (His)<sub>6</sub>-tag sequences in  
31 pET32b to express TPS-His recombinant proteins. Restriction sites and primers used are  
32 detailed in Table S1. The resulting recombinant plasmids were sequence verified and  
33 transformed into *E. coli* Rosetta2(DE3)pLysS cells (Novagen, Burlington, MA, USA).  
34 Single positive colonies were used to inoculate 4 mL LB medium containing 34 ng  $\mu\text{L}^{-1}$   
35 chloramphenicol and 100 ng  $\mu\text{L}^{-1}$  ampicillin. One mL of the overnight culture was  
36 transferred to 100 mL of the same medium and continued to grow at 37°C to reach an  
37 OD<sub>600</sub> of approximately 0.3. Protein expression was induced by adding isopropyl  $\beta$ -  
38 thiogalactopyranoside (IPTG) to a final concentration of 1 mM. After 16 h incubation at  
39 16°C, cells were harvested by centrifugation and stored at -80°C until use. The  
40 recombinant His-tagged proteins were affinity purified using nickel-nitrilotriacetic acid  
41 (Ni-NTA) agarose (Qiagen, Hilden, Germany) according to the manufacturer's manuals.  
42 Protein concentration was determined using the Bradford method (Bradford, 1976) with  
43 BSA as a standard.

44

## 45 **GC-MS analysis of terpenes**

46 The analysis of terpene products (C<sub>10</sub>-C<sub>25</sub>) was performed as described previously (Falara  
47 *et al.*, 2011). One microliter of sample was auto-injected onto a Shimadzu (Kyoto, Japan)  
48 QP-2010 SE GC-MS system equipped with the Rxi-5Sil column (30 m length, 0.25 mm  
49 i.d., and 0.25  $\mu\text{m}$  film thickness; Restek, Bellefonte, PA, USA). The injection port was  
50 set to 240°C in splitless mode, and the flow rate of the He carrier gas was set at 1.4 mL  
51 min<sup>-1</sup>. The GC oven temperature was programmed as follows: 45°C for 2 min, 10°C min<sup>-1</sup>  
52 <sup>1</sup> up to 250°C and hold for 3 min, 20°C min<sup>-1</sup> up to 320°C and hold for 5 min. The

53 analysis of prenyltransferase assay products was performed using an EC-WAX column  
54 (30 m length, 0.32 mm i.d., and 0.25  $\mu\text{m}$  film thickness; Grace, Columbia, MD, USA).  
55 The injection port was set to 220°C in splitless mode, and the flow rate of the He carrier  
56 gas was set at 1.5 mL  $\text{min}^{-1}$ . The GC oven temperature was programmed as follows: 45°C  
57 for 2 min, 10°C  $\text{min}^{-1}$  up to 260°C and hold for 5 min. Interface temperature was 280°C  
58 and ion source temperature was set to 260°C. The detector was activated after a 4.5-min  
59 solvent delay. Mass spectra were obtained using the scan mode (total ion count, 45-450  
60  $mz^{-1}$ ). The Kováts retention indices (Babushok *et al.*, 2011) of each terpene compounds  
61 were determined based on a comparison with (C<sub>7</sub>-C<sub>40</sub>) n-alkanes. Products were  
62 identified using the mass spectra database NIST11 and their mass spectra and retention  
63 indices were compared with authentic compounds or the literature (Table S2).

64

65 Analysis of isoprene was performed by directly injecting the SPME fiber into the  
66 Shimadzu QP-2010 SE GC-MS system equipped with the Rxi-5Sil column (30 m length,  
67 0.25 mm i.d., and 0.25  $\mu\text{m}$  film thickness; Restek). The injection port was set to 220°C in  
68 splitless mode, and the flow rate of the He carrier gas was set at 1.0 mL  $\text{min}^{-1}$ . The GC  
69 oven temperature was programmed as follows: 40°C for 3 min, 10°C  $\text{min}^{-1}$  up to 100°C  
70 and hold for 3 min, 20°C  $\text{min}^{-1}$  up to 260°C and hold for 3 min. Isoprene was identified  
71 by comparison with the authentic standard.

72

### 73 **Correlation analysis of tomato terpene synthase genes and terpene volatiles**

74 The Spearman correlation coefficients were calculated by GraphPad Prism 6 using gene  
75 expression data and terpene profiling data as indicated in Fig. 9 and Fig. 10, respectively.  
76 Based on the Spearman correlation coefficient, the hierarchical clustering was performed  
77 using average linkage method by Cluster 3.0 and a heatmap was built using TreeView  
78 3.0.

79

80 **Accession numbers**

81 The GenBank accession numbers of the proteins used in the phylogenetic analysis (Fig.  
82 S9) are as follows: AgGPPS1, AF513111; AgGPPS2, AF513112; AgGPPS3, AF513113;  
83 PaGPPS, EU432047; PaGPPS/GGPPS, GQ369788; PaGPPS3, EU432048; MiGPPS1,  
84 JN035297; MiGPPS2, JN035298; MiFPPS, JN035296; AmGPPS.LSU, AAS82860;  
85 AmGPPS.SSU, AAS82859; CbGPPS.SSU, AY534745; CrGGPPS, JX417183;  
86 CrGPPS.SSU, JX417184; HIGPPS.LSU, FJ455407; HIGPPS.SSU, ACQ90681;  
87 MpGPPS.LSU, AF182828; MpGPPS.SSU, AF182827; VvGPPS, AAR08151; LaFPPS,  
88 U15777; AaFPPS, U36376; ZmFPPS, L39789; NtGGPPS1, GQ911583; NtGGPPS2,  
89 GQ911584; SaGGPPS, CAA67330; HbSPPS, DQ437520; OsGGPPS1, Os07g39270;  
90 OsGPPS, Os01g14630; OsGRP; Os02g44780. AGI numbers for *A. thaliana* TPTs are as  
91 follows: AtPPPS, At2g434630; AtFPPS1, At5g47770; AtFPPS2, At4g17190; AtSPPS1,  
92 At1g78510; AtSPPS2, At1g17050; AtGGPPS11, At4g36810; AtGGPPS2, At2g18620;  
93 AtSSU, At4g38460. Tomato TPT homologs are listed in Table S5.

94

95 **References**

- 96 **Babushok VI, Linstrom PJ, Zenkevich IG. 2011.** Retention indices for frequently  
97 reported compounds of plant essential oils. *Journal of Physical and Chemical Reference*  
98 *Data* **40**(4).
- 99 **Bradford MM. 1976.** A rapid and sensitive method for the quantitation of microgram  
100 quantities of protein utilizing the principle of protein-dye binding. *Analytical*  
101 *Biochemistry* **72**: 248-254.
- 102 **Falara V, Akhtar TA, Nguyen TT, Spyropoulou EA, Bleeker PM, Schauvinhold I,**  
103 **Matsuba Y, Bonini ME, Schillmiller AL, Last RL, et al. 2011.** The tomato terpene  
104 synthase gene family. *Plant Physiology* **157**(2): 770-789.

105 **Schmittgen TD, Livak KJ. 2008.** Analyzing real-time PCR data by the comparative  $C_T$   
106 method. *Nature Protocol* **3**(6): 1101-1108.
